# Supplementary material for: Discovery of cytotoxic indolo[1,2-c]quinazoline derivatives through scaffold-based design
Source: publisher site journal article supplement (doi:10.3762/bjoc.21.161), 2025-10-13
Supplement: Additional file 1 [file 1860-5397-21-161-S1.pdf]

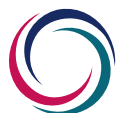

## Supporting Information

for

### Discovery of cytotoxic indolo[1,2-c]quinazoline derivatives through scaffold-based design

Daniil V. Khabarov, Valeria A. Litvinova, Lyubov G. Dezhenkova, Dmitry N. Kaluzhny, Alexander S. Tikhomirov and Andrey E. Shchekotikhin

*Beilstein J. Org. Chem.* **2025**, 21, 2062–2071. doi:10.3762/bjoc.21.161

## Experimental section

### *Instruments, general information and synthetic procedures*

NMR spectra were recorded on a Varian Mercury 400 Plus instrument operated at 400 MHz ( $^1\text{H}$  NMR) and 100 MHz ( $^{13}\text{C}$  NMR). Chemical shifts were measured in  $\text{CDCl}_3$ ,  $\text{CD}_3\text{OD}$  or  $\text{DMSO}-d_6$  using the residual solvent peak as a standard. High-resolution mass spectra were recorded with electron spray ionization on a Bruker Daltonics microOTOF-QII instrument. Melting points were determined using a Büchi SMP-20 apparatus and are given uncorrected. Analytical TLC was performed on Silica Gel F254 plates (Merck). Column chromatography was performed using SilicaGel Merck 60. Analysis of the purity was performed by HPLC on a Shimadzu LC-20 AD chromatograph, Kromasil-100-5- $\mu\text{m}$  C-18 column ( $4.6 \times 250$  mm), LW = 210 nm using the system: A: 0.01 M  $\text{H}_3\text{PO}_4$ , pH 2.6; B: MeCN. All solutions were dried over  $\text{Na}_2\text{SO}_4$  and evaporated at a reduced pressure using IKA RV 10 rotary evaporator at  $<45^\circ\text{C}$ . All products were vacuum-dried at room temperature. All solvents, chemicals and reagents were obtained from Sigma-Aldrich, St. Louis, MO unless specified otherwise, and used without purification.

#### *6-Oxo-5,6-dihydroindolo[1,2-*c*]quinazoline-12-carbaldehyde (2)*

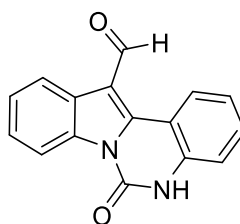

$\text{POCl}_3$  (0.25 mL, 2.68 mmol) was added dropwise to DMF (0.65 mL) at  $0^\circ\text{C}$  and the mixture was stirred for 30 min. A solution of indolo[1,2-*c*]quinazolin-6(5*H*)-one (**1**) [1] (0.10 g, 0.43 mmol) in DMF (2.0 mL) was added to the generated Vilsmeier reagent and the reaction mixture was stirred at room temperature for 1 h. The mixture was poured into crushed ice and quenched with 20% aqueous NaOH solution to pH 8. The resulting precipitate was filtered off and dried under reduced pressure. Yield of **2** is 0.10 g (92%) as a yellow solid, mp  $273\text{--}274^\circ\text{C}$ . HPLC: gradient B 30/70% (30 min)  $t_R = 21.1$  min, purity 97%.  $^1\text{H}$  NMR (400 MHz,  $\text{DMSO}-d_6$ )  $\delta$ , ppm: 11.78 (s, 1H, NH), 10.78 (s, 1H, CHO), 8.71 (d,  $J = 8.2$  Hz, 1H, CH), 8.66–8.57 (m, 1H, CH), 8.37

(dd,  $J = 6.5, 2.4$  Hz, 1H, CH), 7.59 (t,  $J = 7.7$  Hz, 1H, CH), 7.48–7.36 (m, 2H, CH), 7.33 (d,  $J = 8.2$  Hz, 1H, CH), 7.29 (t,  $J = 7.7$  Hz, 1H, CH).  $^{13}\text{C}$  NMR (100 MHz, DMSO- $d_6$ )  $\delta$ , ppm: 186.4, 146.9, 140.5, 136.7, 133.4, 132.5, 128.1, 127.6, 125.7, 125.2, 123.9, 120.9, 116.4, 116.4, 113.7, 112.9. HRMS (ESI) calcd for  $\text{C}_{16}\text{H}_{11}\text{N}_2\text{O}_2$ , 263.0815  $[\text{M}+\text{H}]^+$ ; found, 263.0829.

*6-Oxo-5,6-dihydroindolo[1,2-c]quinazoline-12-carboxylic acid (3)*

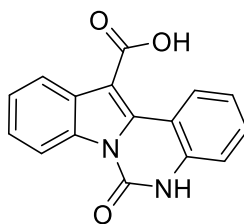

Method A. A solution of  $\text{K}_2\text{Cr}_2\text{O}_7$  (10 mg, 3.4 mmol) and conc.  $\text{H}_2\text{SO}_4$  (8 mL, 14.7 mmol) in  $\text{H}_2\text{O}$  (1.0 mL) was added dropwise to a solution of compound **2** (0.10 g, 0.38 mmol) in AcOH (28.0 mL). The reaction mixture was stirred at room temperature for 3 h, the resulting green precipitate was filtered off, washed with water ( $3 \times 5$  mL), and dried under reduced pressure. Yield of **3** is 11% (0.12 mg).

Method B. Aqueous solution of NaOH (10 mass %, 15.0 mL) was added to a solution of compound **3** (0.60 g, 1.82 mmol) in dioxane (18.0 mL). The reaction mixture was stirred at 60 °C for 6 h. The solution was cooled and neutralized with 5% aqueous HCl to pH 6, the precipitate was filtered off and dried under reduced pressure. Yield of **3** is 0.45g (90%) as a yellow solid, mp 284-286 °C. HPLC: gradient B 30/70% (30 min)  $t_R = 14.9$  min, purity 96%.  $^1\text{H}$  NMR (400 MHz, DMSO- $d_6$ )  $\delta$ , ppm: 11.80 (s, 1H, NH), 9.25–9.12 (m, 1H, CH), 8.70 (dd,  $J = 6.7, 2.5$  Hz, 1H, CH), 8.21–8.09 (m, 1H, CH), 7.57–7.47 (m, 1H, CH), 7.45–7.38 (m, 2H, CH), 7.35–7.19 (m, 2H, CH).  $^{13}\text{C}$  NMR (100 MHz, DMSO- $d_6$ )  $\delta$ , ppm: 167.1, 147.2, 136.7, 136.0, 133.0, 131.4, 128.9, 127.9, 124.8, 124.4, 123.0, 121.7, 116.3, 115.9, 113.1, 107.1. HRMS (ESI) calcd for  $\text{C}_{16}\text{H}_{11}\text{N}_2\text{O}_3$ , 279.0764  $[\text{M}+\text{H}]^+$ ; found, 279.0780.

*6-Oxo-5,6-dihydroindolo[1,2-c]quinazolin-12-yl formate (4)*

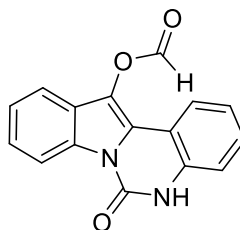

To a solution of compound **2** (50 mg, 0.20 mmol) in DMF (2.0 mL) was added Oxone (0.10 g, 0.60 mmol) and the reaction mixture was stirred at room temperature for 18 h. The reaction mixture was diluted with H<sub>2</sub>O (5.0 mL), the resulted precipitate was filtrated off and dried under reduced pressure. Yield of **4** is 43 mg (77%) as a white solid, mp 237-239 °C. HPLC: gradient B 30/70% (30 min)  $t_R$  = 22.1 min, purity 97%. <sup>1</sup>H NMR (400 MHz, DMSO-*d*<sub>6</sub>)  $\delta$ , ppm: 11.47 (s, 1H, NH), 8.83 (s, 1H, CH), 8.63–8.56 (m, 1H, CH), 8.09–8.03 (m, 1H, CH), 7.60–7.52 (m, 1H, CH), 7.49–7.32 (m, 3H, CH), 7.32–7.19 (m, 2H, CH). <sup>13</sup>C NMR (100 MHz, DMSO-*d*<sub>6</sub>)  $\delta$ , ppm: 161.0, 147.1, 134.8, 130.7, 130.1, 125.6, 124.6, 124.1, 124.1, 123.6, 123.5, 122.5, 117.7, 116.1, 115.8, 112.6. HRMS (ESI) calcd for C<sub>16</sub>H<sub>11</sub>N<sub>2</sub>O<sub>3</sub>, 279.0764 [M+H]<sup>+</sup>; found, 279.0772.

*5,12a-Dihydroindolo[1,2-c]quinazoline-6,12-dione (5)*

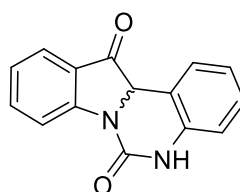

To a solution of compound **4** (0.53 g, 1.9 mmol) in THF (35 mL) was added saturated aqueous NaHCO<sub>3</sub> (11 mL) and refluxed for 3 h. The solution was concentrated under reduced pressure, diluted with EtOAc (20 mL), organic layer washed with water (2 × 10 mL), dried and concentrated under reduced pressure. The crude residue was purified by column chromatography, using a toluene/EtOAc 6:1 gradient as eluent. Yield of **5** is 110 mg (23%) as a white solid, mp 160-163 °C (decomp.). HPLC: gradient B 30/70% (30 min)  $t_R$  = 12.1 min, purity 99%. <sup>1</sup>H NMR (400 MHz, DMSO-*d*<sub>6</sub>)  $\delta$ , ppm:  $\delta$  10.41 (s, 1H, NH), 8.13–8.02 (m, 1H, CH), 7.92-7.90 (m, 1H, CH), 7.79–7.67 (m, 2H, 2CH), 7.65 (s, 1H, CH), 7.34-7.30 (m, 1H, CH), 7.27–7.10 (m, 2H, 2CH), 7.08–



6.98 (m, 2H, 2CH).  $^{13}\text{C}$  NMR (100 MHz,  $\text{DMSO}-d_6$ )  $\delta$ , ppm: 196.2, 151.9, 149.4, 138.6, 138.1, 130.3, 125.2 (2C), 124.0, 122.3, 120.2, 119.5, 116.1, 115.4, 82.7. HRMS (ESI) calcd for  $\text{C}_{15}\text{H}_{11}\text{N}_2\text{O}_2$ , 251.0815  $[\text{M}+\text{H}]^+$ ; found, 251.0802.

*12-(2,2,2-Trifluoroacetyl)indolo[1,2-*c*]quinazolin-6(5H)-one (6)*

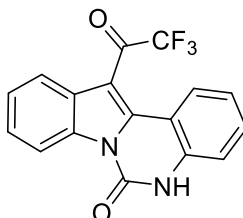

A solution of compound **1** (0.10 g, 0.43 mmol) in TFA (2.0 mL) and TFAA (0.40 mL, 1.42 mmol) was boiled for 40 min, cooled to room temperature, and concentrated under reduced pressure. Yield of **6** is 0.14 g (98%) as a yellow solid, mp 239-240 °C. HPLC: gradient B 50/90% (30 min)  $t_R$  = 18.8 min, purity 95%.  $^1\text{H}$  NMR (400 MHz,  $\text{DMSO}-d_6$ )  $\delta$ , ppm: 12.13 (s, 1H, NH), 8.77–8.69 (m, 1H, CH), 8.18 (d,  $J$  = 8.3 Hz, 1H, CH), 7.77 (d,  $J$  = 7.3 Hz, 1H, CH), 7.59 (t,  $J$  = 7.6 Hz, 1H, CH), 7.51–7.43 (m, 2H, CH), 7.34 (d,  $J$  = 8.2 Hz, 1H, CH), 7.24 (t,  $J$  = 7.8 Hz, 1H, CH).  $^{13}\text{C}$  NMR (100 MHz,  $\text{DMSO}-d_6$ )  $\delta$ , ppm: 180.8 (d,  $J$  = 36.0 Hz), 146.5, 140.5, 136.8, 133.2, 133.0, 126.8, 126.1, 125.7, 125.2, 123.2, 119.4 (d,  $J$  = 3.8 Hz), 117.0, 116.8 (q,  $J$  = 292.2 Hz), 116.4, 112.0, 106.7. HRMS (ESI) calcd for  $\text{C}_{17}\text{H}_{10}\text{F}_3\text{N}_2\text{O}_2$ , 331.0689  $[\text{M}+\text{H}]^+$ ; found, 331.0693.

*N-(2-Aminoethyl)-6-oxo-5,6-dihydroindolo[1,2-*c*]quinazoline-12-carboxamide (7a)*

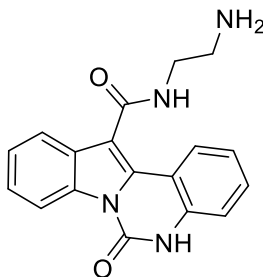

To a solution of compound **3** (50 mg, 0.19 mmol) and DIPEA (66  $\mu\text{L}$ , 0.38 mmol) in DMSO (3.0 mL) were added PyBOP (148 mg, 0.38 mmol) and *tert*-butyl (2-aminoethyl)carbamate (61 mg, 0.38 mmol). The reaction mixture was stirred at room temperature for 1 h, diluted with

EtOAc (15 mL), organic layer washed with 5% aqueous HCl (5 mL), with saturated aqueous NaCl ( $2 \times 5$  mL), dried and concentrated under reduced pressure. The crude residue was purified by flash chromatography, eluent toluene/EtOAc 3:1. The Boc-protected intermediate was dissolved in TFA (1.0 mL, 19.6 mmol) and the solution stirred for 2 h at room temperature. The mixture concentrated under reduced pressure and the residue was dried. Yield of **7a** is 30 mg (58%) as a brown solid, mp 255-256 °C. HPLC: gradient B 10/50% (30 min)  $t_R$  = 14.1 min, purity 97%.  $^1\text{H}$  NMR (400 MHz, DMSO- $d_6$ )  $\delta$ , ppm: 11.59 (s, 1H, NH), 8.80 (t,  $J$  = 5.6 Hz, 1H, CH), 8.68–8.59 (m, 1H, CH), 8.30 (d,  $J$  = 8.1 Hz, 1H, CH), 8.01 (s, 3H, NH<sub>3</sub>), 7.83–7.79 (m, 1H, NH), 7.50–7.45 (m, 1H, CH), 7.44–7.40 (m,  $J$  = 7.3, 3.7 Hz, 2H, CH), 7.31 (d,  $J$  = 8.1 Hz, 1H, CH), 7.22 (t,  $J$  = 7.7 Hz, 1H, CH), 3.66 (q,  $J$  = 6.4 Hz, 2H, CH<sub>2</sub>), 3.09 (t,  $J$  = 6.8 Hz, 2H, CH<sub>2</sub>).  $^{13}\text{C}$  NMR (100 MHz, DMSO- $d_6$ )  $\delta$ , ppm: 165.7, 147.3, 135.4, 132.7, 131.7, 130.7, 128.2, 125.9, 124.4, 124.3, 123.3, 120.1, 116.2, 116.0, 113.1, 110.5, 38.9, 37.6. HRMS (ESI) calcd for C<sub>18</sub>H<sub>17</sub>N<sub>4</sub>O<sub>2</sub>, 321.1346 [M+H]<sup>+</sup>; found, 321.1335.

*N*-(3-Aminopropyl)-6-oxo-5,6-dihydroindolo[1,2-*c*]quinazoline-12-carboxamide (**7b**)

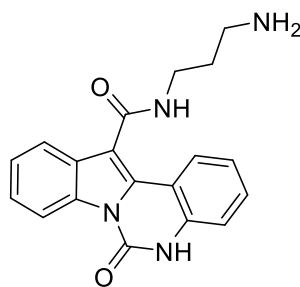

Compound **7b** was prepared from compound **3** as described for derivative **7a**. Yield of **7b** is 34 mg (65%) as a brown solid, mp 258-259 °C. HPLC: gradient B 10/50% (30 min)  $t_R$  = 14.5 min, purity 96%  $^1\text{H}$  NMR (400 MHz, DMSO- $d_6$ )  $\delta$ , ppm: 11.63 (s, 1H, NH), 8.84 (t,  $J$  = 5.7 Hz, 1H, CH), 8.63–8.60 (m, 1H, CH), 8.19 (d,  $J$  = 8.1 Hz, 1H, CH), 7.91 (s, 3H, NH<sub>2</sub>), 7.71-7.68 (m,  $J$  = 6.2, 3.1 Hz 1H, NH), 7.52 – 7.40 (m, 2H, CH), 7.41 (d,  $J$  = 3.3 Hz, 1H, CH), 7.31 (d,  $J$  = 8.1 Hz, 1H, CH), 7.23 (t,  $J$  = 7.6 Hz, 1H, CH), 3.47 (d,  $J$  = 6.1 Hz, 2H, CH<sub>2</sub>), 2.92 (t,  $J$  = 7.6 Hz, 2H, CH<sub>2</sub>), 1.91 (p,  $J$  = 6.9 Hz, 2H, CH<sub>2</sub>).  $^{13}\text{C}$  NMR (100 MHz, DMSO- $d_6$ )  $\delta$ , ppm: 165.5, 147.3, 135.2,

132.6, 131.1, 130.6, 128.4, 125.4, 124.4 (2C), 123.4, 119.6, 116.2, 116.1, 113.2, 110.9, 37.5, 36.8, 27.8. HRMS (ESI) calcd for C<sub>19</sub>H<sub>19</sub>N<sub>4</sub>O<sub>2</sub> 335.1503 [M+H]<sup>+</sup>; found, 335.1486.

*N*-(4-Aminobutyl)-6-oxo-5,6-dihydroindolo[1,2-*c*]quinazoline-12-carboxamide (**7c**)

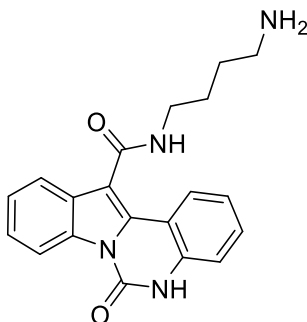

Compound **7c** was prepared from compound **3** as described for derivative **7a**. Yield of **7c** is 57 mg (62%) as a brown solid, mp 260-262 °C. HPLC: gradient B 10/50% (30 min) *t*<sub>R</sub> = 14.8 min, purity 97%. <sup>1</sup>H NMR (400 MHz, DMSO-*d*<sub>6</sub>) δ, ppm: 8.76 (t, *J* = 5.7 Hz, 1H, CH), 8.64-8.60 (m, 1H, CH), 8.22 (d, *J* = 8.0 Hz, 1H, CH), 7.89 (s, 3H, NH<sub>2</sub>), 7.72-7.68 (m, 1H, NH), 7.51-7.43 (m, 1H, CH), 7.46-7.37 (m, 2H, CH), 7.31 (d, *J* = 8.1 Hz, 1H, CH), 7.24 (t, *J* = 7.7 Hz, 1H, CH), 3.41 (d, *J* = 5.6 Hz, 2H, CH), 2.87 (s, 2H, CH<sub>2</sub>), 1.71-1.63 (m, 4H, CH<sub>2</sub>). <sup>13</sup>C NMR (100 MHz, DMSO-*d*<sub>6</sub>) δ, ppm: 165.1, 147.3, 135.2, 132.6, 131.0, 130.5, 128.5, 125.5, 124.3 (2C), 123.3, 119.7, 116.2, 116.0, 113.3, 111.3, 39.1, 39.0, 26.6, 25.2. HRMS (ESI) calcd for C<sub>20</sub>H<sub>21</sub>N<sub>4</sub>O<sub>2</sub> 349.1659 [M+H]<sup>+</sup>; found, 349.1673.

12-((Dimethylamino)methyl)indolo[1,2-*c*]quinazolin-6(5*H*)-one (**9a**)

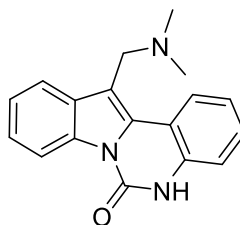

To a solution of compound **1** (0.10 g, 0.43 mmol) in DMF (2.0 mL) was added *N,N*-dimethylmethyleiminium chloride (88 mg, 0.99 mmol). The mixture was stirred at 80 °C for 6 h, cooled to room temperature and carefully quenched with saturated aqueous NaHCO<sub>3</sub> (8 mL). The white precipitate was filtered off, washed with water (3 × 5 mL), and dried under reduced

pressure. Yield of **9a** is 93 mg (75%) as a white solid, mp 279-280 °C. HPLC: gradient B 10/50% (30 min)  $t_R$  = 16.8 min, purity 100%.  $^1\text{H}$  NMR (400 MHz, DMSO- $d_6$ )  $\delta$ , ppm: 11.74 (s, 1H, NH), 10.34 (s, 1H, NH), 8.67–8.58 (m, 1H, CH), 8.37 (d,  $J$  = 8.1 Hz, 1H, CH), 8.12–8.05 (m, 1H, CH), 7.50 (t,  $J$  = 7.7 Hz, 1H, CH), 7.47–7.34 (m, 3H, CH), 7.28 (t,  $J$  = 7.6 Hz, 1H, CH), 4.99 (s, 2H, CH<sub>2</sub>), 2.88–2.83 (m, 6H, CH<sub>3</sub>).  $^{13}\text{C}$  NMR (100 MHz, DMSO- $d_6$ )  $\delta$ , ppm: 147.2, 135.7, 133.8, 132.9, 130.6, 130.5, 125.8, 124.5, 124.1, 123.5, 119.4, 116.2, 116.2, 113.4, 50.3, 42.6 (2C), 34.4. HRMS (ESI) calcd for C<sub>18</sub>H<sub>18</sub>N<sub>3</sub>O, 292.1444 [M+H]<sup>+</sup>; found, 292.1453.

*12-((Diethylamino)methyl)indolo[1,2-c]quinazolin-6(5H)-one (9b)*

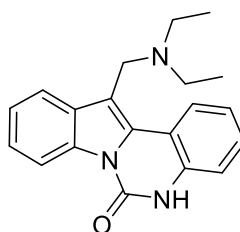

To a solution of compound **1** (50 mg, 0.21 mmol) in acetic acid (10 mL) were added diethylamine (0.1 mL, 1.28 mmol) and 37% aqueous formaldehyde (25  $\mu\text{L}$ , 0.32 mmol). The reaction mixture was stirred at room temperature for 24 h, and concentrated under reduced pressure. The residue was diluted with saturated aqueous NaHCO<sub>3</sub> (10.0 mL), the residue was filtered off, washed with water (1  $\times$  5 mL), and dried under reduced pressure. Yield of **9b** is 20 mg (30%) as a white solid, mp 264-265 °C (decomp.). HPLC: gradient B 10/50% (30 min)  $t_R$  = 19.1 min, purity 95%.  $^1\text{H}$  NMR (400 MHz, DMSO- $d_6$ )  $\delta$ , ppm: 11.77 (s, 1H, NH), 9.76 (s, 1H, NH), 8.69–8.60 (m, 1H, CH), 8.28 (d,  $J$  = 8.2 Hz, 1H), 8.07–7.99 (m, 1H, CH), 7.57–7.35 (m, 4H, CH), 7.31 (t,  $J$  = 7.7 Hz, 1H, CH), 5.01 (d,  $J$  = 5.4 Hz, 2H, CH), 3.39–3.27 (m, 2H, CH<sub>2</sub>), 3.27–3.16 (m, 2H, CH<sub>2</sub>), 1.31 (t,  $J$  = 7.1 Hz, 6H, CH<sub>3</sub>).  $^{13}\text{C}$  NMR (100 MHz, DMSO- $d_6$ )  $\delta$ , ppm: 147.2, 135.7, 133.8, 132.9, 130.6 (2C), 125.6, 124.6, 124.2, 123.4, 119.3, 116.3, 116.3, 113.5, 102.6, 47.3, 47.0 (2C), 9.2 (2C). HRMS (ESI) calcd for C<sub>20</sub>H<sub>22</sub>N<sub>3</sub>O, 320.1757 [M+H]<sup>+</sup>; found, 320.1773.

*12-(Pyrrolidin-1-ylmethyl)indolo[1,2-c]quinazolin-6(5H)-one (9c)*

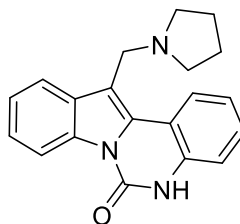

Compound **9c** was prepared from compound **1** as described for derivative **9b**. Yield of **9c** is 53 mg (78%) as a white solid, mp 258-260 °C. HPLC: gradient B 30/70% (30 min)  $t_R$  = 4.8 min, purity 98%.  $^1\text{H}$  NMR (400 MHz, DMSO- $d_6$ )  $\delta$ , ppm: 11.37 (s, 1H, NH), 8.63–8.54 (m, 1H, CH), 8.32–8.25 (m, 1H, CH), 7.90–7.82 (m, 1H, CH), 7.44–7.34 (m, 2H, CH), 7.34 (d,  $J$  = 4.2 Hz, 1H, CH), 7.24 (dd,  $J$  = 8.0, 5.7 Hz, 2H, CH), 4.01 (s, 2H, CH<sub>2</sub>), 2.52 (d,  $J$  = 5.6 Hz, 4H, CH<sub>2</sub>), 1.65 (q,  $J$  = 3.3 Hz, 4H, CH<sub>2</sub>).  $^{13}\text{C}$  NMR (100 MHz, DMSO- $d_6$ )  $\delta$ , ppm: 147.6, 135.1, 132.6, 131.1, 130.9, 129.3 (C), 126.6, 123.7, 123.6, 123.3, 118.7, 116.0, 115.5, 114.8, 111.8, 54.0 (2C), 49.2, 23.6 (2C). HRMS (ESI) calcd for C<sub>20</sub>H<sub>20</sub>N<sub>3</sub>O, 318.1601 [M+H]<sup>+</sup>; found, 318.1613.

*12-(Piperidin-1-ylmethyl)indolo[1,2-c]quinazolin-6(5H)-one (9d)*

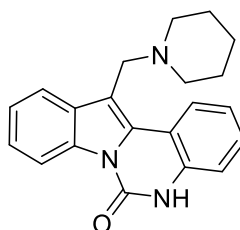

Compound **9d** was prepared from compound **1** as described for derivative **9b**. Yield of **9d** is 50 mg (73%) as a white solid, mp 254-256 °C. HPLC: gradient B 30/70% (30 min)  $t_R$  = 5.9 min, purity 97%.  $^1\text{H}$  NMR (400 MHz, DMSO- $d_6$ )  $\delta$ , ppm: 11.35 (s, 1H, NH), 8.61–8.54 (m, 1H, CH), 8.30 (d,  $J$  = 7.9 Hz, 1H, CH), 7.81 (d,  $J$  = 7.0 Hz, 1H, CH), 7.44–7.30 (m, 3H, CH), 7.24 (t,  $J$  = 7.8 Hz, 2H, CH), 3.84 (s, 2H, CH<sub>2</sub>), 2.45 (s, 4H, CH<sub>2</sub>), 1.46–1.35 (m, 6H, CH<sub>2</sub>).  $^{13}\text{C}$  NMR (100 MHz, DMSO- $d_6$ )  $\delta$ , ppm: 147.6, 135.2, 132.6, 131.6, 131.3 (C), 129.4, 126.8, 123.7, 123.7, 123.2, 118.8, 116.0, 115.5, 114.7, 110.9, 54.3 (2C), 52.6, 26.1 (2C), 24.5. HRMS (ESI) calcd for C<sub>21</sub>H<sub>22</sub>N<sub>3</sub>O, 332.1757 [M+H]<sup>+</sup>; found, 332.1743.

*12-((4-Methylpiperazin-1-yl)methyl)indolo[1,2-c]quinazolin-6(5H)-one (9e)*

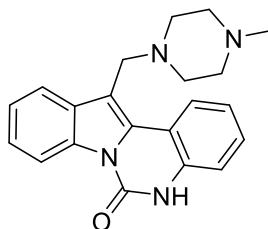

Compound **9e** was prepared from compound **1** as described for **9b**. Yield of **9e** is 55 mg (75%) as a white solid, mp 260 °C (decomp.). HPLC: gradient B 30/70% (30 min)  $t_R$  = 4.8 min, purity 96%.  $^1\text{H}$  NMR (400 MHz, DMSO- $d_6$ )  $\delta$ , ppm: 11.42 (s, 1H, NH), 8.61–8.55 (m, 1H, CH), 8.28 (d,  $J$  = 8.0 Hz, 1H, CH), 7.86–7.79 (m, 1H, CH), 7.40 (t,  $J$  = 7.7 Hz, 1H, CH), 7.36–7.30 (m,  $J$  = 8.2, 4.0 Hz, 2H, CH), 7.24 (dd,  $J$  = 16.5, 8.1 Hz, 2H, CH), 3.88 (s, 2H, CH<sub>2</sub>), 2.25 (s, 4H, CH<sub>2</sub>), 2.09 (s, 3H, CH<sub>2</sub>), 1.83 (s, 3H, CH<sub>3</sub>).  $^{13}\text{C}$  NMR (100 MHz, DMSO- $d_6$ )  $\delta$ , ppm: 173.4, 147.6, 135.2, 132.6, 131.5, 131.4, 129.4, 126.8, 123.7, 123.7, 123.2, 118.7, 116.0, 115.5, 114.7, 110.4, 55.2, 52.9, 51.8, 46.1, 22.7. HRMS (ESI) calcd for C<sub>21</sub>H<sub>23</sub>N<sub>4</sub>O, 347.1866 [M+H]<sup>+</sup>; found, 347.1881.

*12-([1,4'-Bipiperidin]-1'-ylmethyl)indolo[1,2-c]quinazolin-6(5H)-one (9f)*

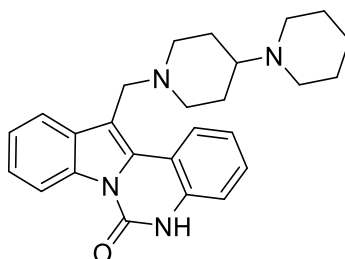

Compound **9f** was prepared from compound **1** as described for **9b**. Yield of **9f** is 53 mg (61%) as a white solid, mp 273-274 °C. HPLC: gradient B 10/50% (30 min)  $t_R$  = 12.2 min, purity 98%.  $^1\text{H}$  NMR (400 MHz, DMSO- $d_6$ )  $\delta$ , ppm: 8.64–8.57 (m, 1H, CH), 8.31 (d,  $J$  = 8.0 Hz, 1H, CH), 7.84–7.78 (m, 1H, CH), 7.43–7.18 (m, 5H, CH), 3.88 (s, 2H, CH<sub>2</sub>), 2.93 – 2.89 (m, 1H, CH), 2.36 (t,  $J$  = 5.1 Hz, 4H, CH<sub>2</sub>), 2.22–2.04 (m, 4H, CH<sub>2</sub>), 1.67–1.60 (m, 2H, CH<sub>2</sub>), 1.44–1.29 (m, 8H, CH<sub>2</sub>).  $^{13}\text{C}$  NMR (100 MHz, DMSO- $d_6$ )  $\delta$ , ppm: 132.7, 131.6, 129.2, 126.7, 123.6, 123.5, 122.9, 118.7, 116.1, 62.5, 53.3 (3C), 52.0, 50.2 (3C), 28.3 (4C), 26.6 (4C), 25.0. HRMS (ESI) calcd for C<sub>26</sub>H<sub>31</sub>N<sub>4</sub>O, 415.2492 [M+H]<sup>+</sup>; found, 415.2498.

*N,N*-Dimethyl-1-(6-methylindolo[1,2-*c*]quinazolin-12-yl)methanamine (**10a**)

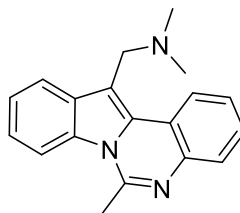

Compound **8** (0.2 g, 0.86 mmol) [2] was dissolved in acetic acid (20.0 mL), followed by the addition of 33% aqueous dimethylamine (40  $\mu$ L, 0.28 mmol) and 37% aqueous formaldehyde (25  $\mu$ L, 0.32 mmol). The reaction mixture was stirred for 24 h at room temperature. After completion, the mixture was concentrated under reduced pressure. Saturated aqueous  $\text{NaHCO}_3$  (10.0 mL) was then added, and the resulting precipitate was collected by filtration. The residue was purified by column chromatography, eluent toluene/EtOAc 3:1. Yield of **10a** is 71 mg (30%) as a brown solid, mp 213-215  $^{\circ}\text{C}$ . HPLC (Gradient B 10/50% (30 min))  $t_{\text{R}}$  = 16.0 min, purity 96%.  $^1\text{H}$  NMR (400 MHz,  $\text{CD}_3\text{OD}$ )  $\delta$  8.70–8.63 (m, 1H, CH), 8.46 (d,  $J$  = 8.3 Hz, 1H, CH), 8.27 (dd,  $J$  = 7.6, 1.6 Hz, 1H, CH), 7.97–7.85 (m, 3H, CH), 7.85–7.72 (m, 2H, CH), 5.30 (s, 2H,  $\text{CH}_2$ ), 3.55 (d,  $J$  = 4.9 Hz, 3H,  $\text{CH}_3$ ), 3.09 (s, 6H,  $\text{CH}_3$ ).  $^{13}\text{C}$  NMR (100 MHz,  $\text{CD}_3\text{OD}$ )  $\delta$  156.5, 132.2, 131.7, 131.6, 131.3, 129.9, 129.8, 127.1, 126.2, 124.7, 119.6, 119.4, 117.8, 116.5, 106.0, 50.1, 42.3 (2C), 20.8. HRMS (ESI) calcd for  $\text{C}_{19}\text{H}_{20}\text{N}_3$ , 290.1652  $[\text{M}+\text{H}]^+$ ; found, 290.1664.

*6*-Methyl-12-(pyrrolidin-1-ylmethyl)indolo[1,2-*c*]quinazoline (**10b**)

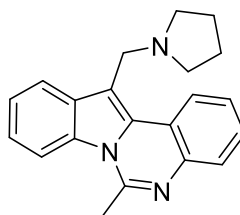

Compound **10b** was prepared from compound **8** as described for **10a**. Yield of **10b** is 45 mg (76%) as a brown solid, mp 133-135  $^{\circ}\text{C}$ . HPLC: gradient B 30/70% (30 min)  $t_{\text{R}}$  = 4.8 min, purity 96%.  $^1\text{H}$  NMR (400 MHz,  $\text{DMSO}-d_6$ )  $\delta$ , ppm: 8.47–8.38 (m, 1H, CH), 8.19 (d,  $J$  = 8.2 Hz, 1H, CH), 7.95 (d,  $J$  = 7.8 Hz, 1H, CH), 7.67–7.59 (m, 1H, CH), 7.55–7.48 (m, 2H, CH), 7.46–7.34 (m, 2H, CH), 4.06 (s, 2H,  $\text{CH}_2$ ), 3.06 (s, 3H,  $\text{CH}_3$ ), 2.54 (d,  $J$  = 5.7 Hz, 4H,  $\text{CH}_2$ ), 1.65 (q,  $J$  = 3.3 Hz,

4H, CH<sub>2</sub>). <sup>13</sup>C NMR (100 MHz, DMSO-*d*<sub>6</sub>) δ, ppm: 149.0, 139.8, 131.2, 131.0, 130.4, 129.0, 127.0, 126.7, 126.0, 123.4, 122.7, 120.9, 118.8, 115.8, 109.0, 54.0 (2C), 49.3, 25.6, 23.6 (2C). HRMS (ESI) calcd for C<sub>21</sub>H<sub>22</sub>N<sub>3</sub>, 316.1808 [M+H]<sup>+</sup>; found, 316.1819.

*4-((6-Methylindolo[1,2-*c*]quinazolin-12-yl)methyl)morpholine (10c)*

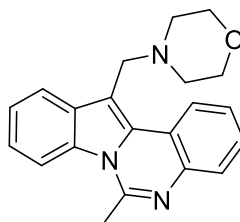

Compound **10c** was prepared from compound **8** as described for **10a**. Yield of **10c** is 40 mg (58%) as a brown solid, mp 174-175 °C. HPLC: gradient B 10/50% (30 min) *t*<sub>R</sub> = 16.6 min, purity 97%. <sup>1</sup>H NMR (400 MHz, DMSO-*d*<sub>6</sub>) δ, ppm: 8.46–8.43 (m, *J* = 8.0, 3.1 Hz, 1H, CH), 8.19 (d, *J* = 8.3 Hz, 1H, CH), 7.99–7.92 (m, 1H, CH), 7.69–7.61 (m, 1H, CH), 7.58–7.34 (m, 4H, CH), 3.95 (s, 2H, CH<sub>2</sub>), 3.49 (t, *J* = 4.6 Hz, 4H, CH<sub>2</sub>), 3.05 (s, 3H, CH<sub>3</sub>), 2.52–2.45 (m, 4H, CH<sub>2</sub>). <sup>13</sup>C NMR (100 MHz, DMSO-*d*<sub>6</sub>) δ, ppm: 149.0, 139.9, 131.7, 131.5, 130.4, 129.1, 127.1, 126.8, 126.1, 123.6, 122.8, 120.8, 118.8, 115.9, 107.1, 66.7 (2C), 53.5 (2C), 52.3, 25.7. HRMS (ESI) calcd for C<sub>21</sub>H<sub>22</sub>N<sub>3</sub>O, 332.1757 [M+H]<sup>+</sup>; found, 332.1748.

*5-(3-Chloropropyl)indolo[1,2-*c*]quinazolin-6(5H)-one (11)*

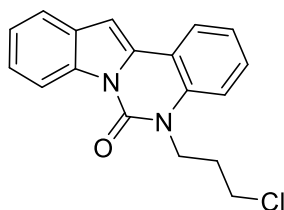

To a solution of compound **1** (0.15 g, 0.64 mmol) in DMA were added anhydrous potassium carbonate (0.16 g, 1.26 mmol) and 1-bromo-3-chloropropane (70 μL, 0.70 mmol). The reaction mixture was stirred at room temperature for 30 min, then quenched with 5% aqueous HCl solution. The product was extracted with ethyl acetate (2 × 20 mL), the combined organic layer was washed with saturated NaCl solution (3 × 20 mL), water (20 mL), dried over Na<sub>2</sub>SO<sub>4</sub>, and concentrated



under reduced pressure. The crude product was purified by column chromatography, using CHCl<sub>3</sub>/MeOH (30:0.5) as eluent, followed by precipitation from DCM with petroleum ether (1:3). Yield of **11** is 0.15 g (77%) as a white solid, mp 120-124 °C. <sup>1</sup>H NMR (400 MHz, CDCl<sub>3</sub>) δ, ppm: 8.71–8.63 (m, 1H), 7.93 (dd, *J* = 7.8, 1.5 Hz, 1H), 7.72–7.63 (m, 1H), 7.46–7.43 (m, 1H), 7.40–7.36 (m, 2H), 7.32–7.19 (m, 2H), 7.02 (s, 1H), 4.41 (dd, *J* = 8.6, 6.4 Hz, 2H), 3.74 (t, *J* = 6.2 Hz, 2H), 2.33–2.26 (m, 2H). <sup>13</sup>C NMR (100 MHz, CDCl<sub>3</sub>) δ, ppm: 147.8, 134.5, 134.2, 133.0, 129.9, 129.4, 124.1, 123.8, 123.5, 123.2, 120.1, 116.2, 115.6, 114.1, 98.1, 42.6, 40.9, 30.3. HRMS (ESI) calcd for C<sub>18</sub>H<sub>15</sub>ClN<sub>2</sub>O, 311.0946 [M+H]<sup>+</sup>; found 311.0955.

*5-(3-(Pyrrolidin-1-yl)propyl)indolo[1,2-*c*]quinazolin-6(5*H*)-one hydrochloride (12a)*

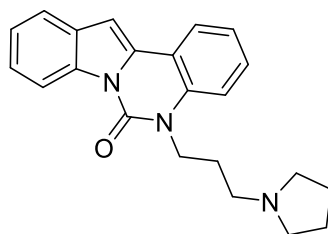

To a solution of compound **11** (50 mg, 0.16 mmol) in THF (10 mL) was added pyrrolidine (0.16 mL, 1.6 mmol) and was stirred 60 °C for 2 h. The reaction mixture was concentrated under reduced pressure. The crude residue was purified by column chromatography, using CHCl<sub>3</sub>/MeOH 20:5 as eluent, followed by precipitation from DCM with petroleum ether (1:3). Yield of **12a** is 44 mg (72%) as a beige solid, mp 150-151 °C. HPLC (LW = 265 nm, gradient B 40/95% (30 min)) *t<sub>R</sub>* = 8.0 min, purity 99%. <sup>1</sup>H NMR (400 MHz, CDCl<sub>3</sub>) δ 8.70 – 8.63 (m, 1H, CH), 7.94-7.92 (m, 1H, CH), 7.69-7.66 (m, 1H, CH), 7.42 (t, *J* = 7.9 Hz, 1H, CH), 7.39–7.28 (m, 3H, CH), 7.24–7.20 (m, 1H, CH), 7.03 (d, *J* = 3.0 Hz, 1H, CH), 4.39–4.30 (m, 2H, CH<sub>2</sub>), 2.80 (t, *J* = 7.5 Hz, 2H, CH<sub>2</sub>), 2.73 (d, *J* = 6.2 Hz, 6H, CH<sub>2</sub>), 2.14 (br s, 2H, CH<sub>2</sub>), 1.26 (d, *J* = 11.9 Hz, 2H, CH<sub>2</sub>). <sup>13</sup>C NMR (100 MHz, CDCl<sub>3</sub>) δ 147.9, 134.6, 134.2, 133.1, 129.9, 129.4, 124.0, 123.8, 123.4, 123.1, 120.1, 116.3, 115.5, 114.5, 98.0, 54.0 (2C), 53.4, 41.3, 26.3, 23.4 (2C). HRMS (ESI) calcd for C<sub>22</sub>H<sub>24</sub>N<sub>3</sub>O, 346.1914 [M+H]<sup>+</sup>; found, 346.1925.

*5-(3-(Piperidin-1-yl)propyl)indolo[1,2-c]quinazolin-6(5H)-one hydrochloride (12b)*

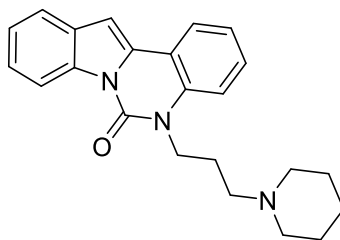

Compound **12b** was prepared from **1** as described for **12a**. Yield of **12b** is 44 mg (72%) as a beige solid, mp 132-135°C. HPLC: gradient B 40/95% (30 min)  $t_R$  = 9.5 min, purity 100%.  $^1\text{H}$  NMR (400 MHz,  $\text{CDCl}_3$ )  $\delta$ , ppm: 8.61 – 8.55 (m, 1H, CH), 7.90 (d,  $J$  = 7.2 Hz, 1H, CH), 7.68-7.66 (m, 1H, CH), 7.48 (s, 1H, CH), 7.39–7.32 (m, 2H, CH), 7.23 (s, 1H, CH), 7.03 (s, 1H, CH), 4.37 (s, 2H,  $\text{CH}_2$ ), 3.56 (s, 2H,  $\text{CH}_2$ ), 3.19 (s, 2H,  $\text{CH}_2$ ), 2.63 (s, 2H,  $\text{CH}_2$ ), 2.52 (s, 2H,  $\text{CH}_2$ ), 2.26 (s, 2H,  $\text{CH}_2$ ), 2.14 (s, 1H,  $\text{CH}_2$ ), 1.85 (s, 3H,  $\text{CH}_2$ ).  $^{13}\text{C}$  NMR (101 MHz,  $\text{CDCl}_3$ )  $\delta$ , ppm: 148.1, 134.1, 134.0, 133.0, 130.0, 130.0, 124.1, 123.9, 123.6, 123.5, 120.2, 116.1, 115.4, 114.7, 98.4, 55.4, 53.7 (2C), 40.8, 22.9, 22.6 (2C), 22.1. HRMS (ESI) calcd for  $\text{C}_{23}\text{H}_{26}\text{N}_3\text{O}$ , 360.2070  $[\text{M}+\text{H}]^+$ ; found, 360.2081.

*5-(3-(Piperazin-1-yl)propyl)indolo[1,2-c]quinazolin-6(5H)-one dihydrochloride (12c)*

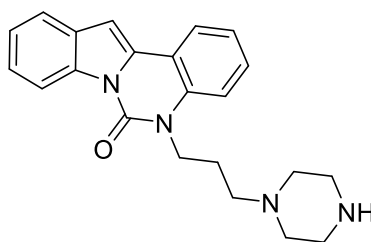

To a solution of compound **1** (50 mg, 0.16 mmol) in THF (10 mL) was added mono-Boc-piperazine (0.30 g, 1.6 mmol). The reaction mixture was refluxed for 2 h, cooled to room temperature, and poured into water acidified by HCl solution. The product was extracted with ethyl acetate (2  $\times$  20 mL), the combined organic layer was washed with saturated NaCl solution (2  $\times$  10 mL), dried over  $\text{Na}_2\text{SO}_4$ , and concentrated under reduced pressure. The crude residue was purified by column chromatography, using  $\text{CHCl}_3/\text{MeOH}$  30:1 as eluent. The mono-Boc intermediate (74 mg, 0.16 mmol) was dissolved in chloroform (1 mL), TFA (61  $\mu\text{L}$ , 0.80 mmol)

was added and the reaction mixture was stirred at room temperature for 2 h. The solvent was removed under reduced pressure. The resulting oily residue was treated with methanol (1 mL) and HCl in Et<sub>2</sub>O (100  $\mu$ L), and the mixture was stirred for 10 min. The reaction mixture was concentrated under reduced pressure. This crude material was triturated with acetone (10 mL) and diethyl ether (10 mL), with careful decantation of the supernatant after each wash. The remaining solid residue was dried under reduced pressure. Yield of **12c** is 66 mg (96%) as a beige sticky oil. HPLC: gradient B 20/50% (30 min)  $t_R$  = 15.7 min, purity 97%. HRMS (ESI) calcd for C<sub>22</sub>H<sub>25</sub>N<sub>4</sub>O, 361.2028 [M+H]<sup>+</sup>; found, 361.1995. <sup>1</sup>H NMR (400 MHz, DMSO-*d*<sub>6</sub>)  $\delta$  8.65 – 8.42 (m, 1H, CH), 8.18 (d,  $J$  = 7.8 Hz, 1H, CH), 7.80–7.66 (m, 1H, CH), 7.63–7.48 (m, 2H, CH), 7.41–7.24 (m, 4H, CH), 4.33 (t,  $J$  = 7.1 Hz, 2H, CH<sub>2</sub>), 3.65 (s, 2H, CH<sub>2</sub>), 3.34 (s, 8H, CH<sub>2</sub>), 2.20 (t,  $J$  = 8.1 Hz, 2H, CH<sub>2</sub>). <sup>13</sup>C NMR (100 MHz, DMSO-*d*<sub>6</sub>)  $\delta$ , ppm 161.7, 159.3, 159.0, 147.8, 134.6, 134.1, 133.6, 130.2, 124.8, 124.2, 123.8, 123.6, 120.7, 116.2, 115.4, 115.4, 98.6, 53.8, 48.7, 40.9, 22.8, 22.7. HRMS (ESI) calcd for C<sub>22</sub>H<sub>25</sub>N<sub>4</sub>O, 361.2023 [M+H]<sup>+</sup>; found, 361.2013.

*6-(Pyrrolidin-1-ylmethyl)indolo[1,2-*c*]quinazoline (14a)*

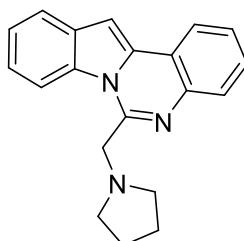

To a solution of compound **13** [3] (80 mg, 0.30 mmol) in toluene (3.0 mL), were added pyrrolidine (33  $\mu$ L, 0.39 mmol) and potassium carbonate (0.15 g, 1.1 mmol). The reaction mixture was stirred at room temperature for 48 h. The reaction mixture was diluted with EtOAc (15 mL), washed with water (2  $\times$  10 mL), dried over Na<sub>2</sub>SO<sub>4</sub> and concentrated under reduced pressure. The residue was precipitated from DCM with petroleum ether (1:3). Yield of **14a** is 40 mg (44%) as a white solid, mp 103-105°C. HPLC: gradient B 30/70% (30 min)  $t_R$  = 13.3 min, purity 97%. <sup>1</sup>H NMR (400 MHz, DMSO-*d*<sub>6</sub>)  $\delta$ , ppm: 8.28-8.24 (m, 1H, CH), 8.13–8.10 (m, 1H, CH), 7.81 (dd,  $J$  = 6.1, 3.2 Hz, 1H, CH), 7.75–7.68 (m, 1H, CH), 7.62–7.50 (m, 2H, CH), 7.51 (s, 1H, CH), 7.47–

7.37 (m, 2H, CH), 4.24 (s, 2H, CH<sub>2</sub>), 2.66 (d,  $J = 5.8$  Hz, 4H, CH<sub>2</sub>), 1.72–1.64 (m, 4H, CH<sub>2</sub>). <sup>13</sup>C NMR (100 MHz, DMSO-*d*<sub>6</sub>)  $\delta$ , ppm: 149.0, 138.6, 134.8, 131.4, 130.1, 129.5, 127.9, 127.6, 123.7, 123.4, 122.5, 120.7, 120.6, 117.2, 96.4, 60.6, 53.8 (2C), 23.6 (2C). HRMS (ESI) calcd for C<sub>20</sub>H<sub>20</sub>N<sub>3</sub>, 302.1652 [M+H]<sup>+</sup>; found, 302.1661.

*6-(Piperidin-1-ylmethyl)indolo[1,2-*c*]quinazoline (14b)*

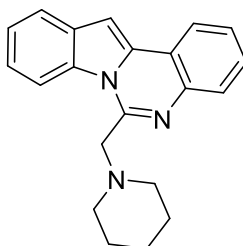

Compound **14b** was prepared from **13** as described for **14a**. Yield of **14b** is 62% (58 mg) as a white solid, mp 120-122°C. HPLC: gradient B 30/70% (30 min)  $t_R = 14.3$  min, purity 98%. <sup>1</sup>H NMR (400 MHz, DMSO-*d*<sub>6</sub>)  $\delta$  8.24 (dd,  $J = 6.9, 2.2$  Hz, 1H, CH), 8.12–8.04 (m, 1H, CH), 7.85–7.77 (m, 1H, CH), 7.70 (dd,  $J = 7.0, 2.0$  Hz, 1H, CH), 7.61–7.48 (m, 3H, CH), 7.43–7.34 (m, 2H, CH), 4.05 (s, 2H, CH<sub>2</sub>), 2.55 (s, 4H, CH<sub>2</sub>), 1.48–1.33 (m, 6H, CH<sub>2</sub>). <sup>13</sup>C NMR (100 MHz, DMSO-*d*<sub>6</sub>)  $\delta$ , ppm: 148.0, 138.4, 134.8, 131.4, 130.0, 129.5, 128.0, 127.6, 123.7, 123.4, 122.4, 120.6, 120.5, 117.3, 96.5, 63.5, 54.3 (2C), 25.9 (2C), 24.2. HRMS (ESI) calcd for C<sub>21</sub>H<sub>22</sub>N<sub>3</sub>, 316.1808 [M+H]<sup>+</sup>; found, 316.1816.

*4-(Indolo[1,2-*c*]quinazolin-6-ylmethyl)morpholine (14c)*

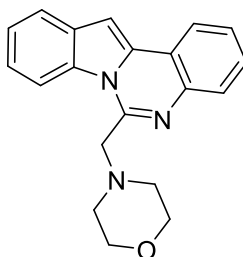

Compound **14c** was prepared from **13** as described for **14a**. Yield of **14c** is 69 mg (73%) as a brown solid, mp 150-154°C (decomp.). HPLC: gradient B 30/70% (30 min)  $t_R = 11.5$  min, purity 96%. <sup>1</sup>H NMR (400 MHz, DMSO-*d*<sub>6</sub>)  $\delta$ , ppm: 8.25–8.22 (m, 1H, CH), 8.10–8.07 (m, 1H, CH),

7.85–7.78 (m, 1H, CH), 7.75–7.67 (m, 1H, CH), 7.60–7.49 (m, 3H, CH), 7.42–7.37 (m, 2H, CH), 4.13 (s, 2H, CH<sub>2</sub>), 3.52 (t,  $J = 4.6$  Hz, 4H, CH<sub>2</sub>), 2.61 (t,  $J = 4.4$  Hz, 4H, CH<sub>2</sub>). <sup>13</sup>C NMR (100 MHz, DMSO-*d*<sub>6</sub>)  $\delta$ , ppm: 147.4, 138.3, 134.8, 131.3, 130.1, 129.6, 128.1, 127.6, 123.8, 123.4, 122.5, 120.7, 120.6, 117.2, 96.5, 66.5 (2C), 63.0, 53.6 (2C). HRMS (ESI) calcd for C<sub>20</sub>H<sub>18</sub>N<sub>3</sub>O, 316.1455 [M+H]<sup>+</sup>; found, 316.1439.

*6-((4-Methylpiperazin-1-yl)methyl)indolo[1,2-*c*]quinazoline (14d)*

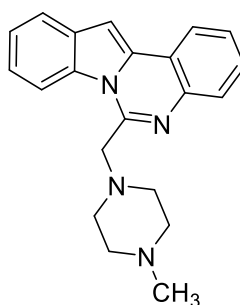

Compound **14d** was prepared from **13** as described for **14a**. Yield of **14d** is 70 mg (71%) as a brown solid. HPLC: gradient B 30/70% (30 min))  $t_R = 9.5$  min, purity 98%. <sup>1</sup>H NMR (400 MHz, DMSO-*d*<sub>6</sub>)  $\delta$  8.28–8.20 (m, 1H, CH), 8.10–8.04 (m, 1H, CH), 7.84–7.77 (m, 1H, CH), 7.76–7.67 (m, 1H, CH), 7.60–7.49 (m, 3H, CH), 7.42–7.33 (m, 2H, CH), 4.10 (s, 2H, CH<sub>2</sub>), 2.60 (s, 4H, CH<sub>2</sub>), 2.25 (s, 4H, CH<sub>2</sub>), 2.08 (s, 3H, CH<sub>3</sub>). <sup>13</sup>C NMR (100 MHz, DMSO-*d*<sub>6</sub>)  $\delta$ , ppm: 147.8, 138.4, 134.8, 131.3, 130.1, 129.5, 128.1, 127.6, 123.8, 123.4, 122.4, 120.7, 120.5, 117.3, 96.5, 62.8, 54.9 (2C), 53.0 (2C), 46.0. HRMS (ESI) calcd for C<sub>21</sub>H<sub>23</sub>N<sub>4</sub>, 331.1917 [M+H]<sup>+</sup>; found, 331.1922.

*Cell lines, drug treatment and cytotoxicity assays*

In a manner similar to [4] all tumor cell lines were from American Type Culture Collection (Manassas, VA). Non-malignant hFB-hTERT6 human skin fibroblasts (HSF) were obtained via a lentiviral transduction of full-length TERT gene under a cytomegalovirus promoter (generated at Engelhardt Institute of Molecular Biology, Moscow by E. Dashinimaev). Cells were cultured in Dulbecco's modified eagle medium (DMEM, PanEco, Russia) (adherent lines) or RPMI-1640 medium (PanEco, Russia) (suspension lines), supplemented with 5% fetal calf serum (HyClone,

Logan, UT), 2 mM L-glutamine, 100 U/mL penicillin, and 100 µg/mL streptomycin at 37 °C, 5% CO<sub>2</sub> in a humidified atmosphere. Cells in logarithmic growth phase were used in all experiments. Compounds were dissolved in 10% aqueous DMSO as 10 mM stock solutions followed by serial dilutions in water immediately before experiments. Briefly, cells ( $5 \times 10^3$  in 190 µL of culture medium) were plated into a 96-well plate (Becton Dickinson, Franklin Lakes, NJ) and treated with 0.1% DMSO (vehicle control) or with increasing concentrations of compounds for 72 h. After the completion of drug exposure, 0.5 mg/mL of 3-(4,5-dimethylthiazol-2-yl)-2,5-diphenyltetrazolium bromide was added into each well for an additional 2 h. Formazan was dissolved in DMSO, and the absorbance at 570 nm was measured. The cytotoxicity at a given drug concentration was calculated as the percentage of absorbance in wells with drug-treated cells to that of vehicle control cells (100%). The IC<sub>50</sub> (50% growth inhibitory concentration) was defined as the concentration of the compound that inhibited MTT conversion by 50%.

#### *DNA binding assay by fluorescence titration*

In a manner similar to [5] formation of complexes of compounds with calf thymus DNA (Sigma Aldrich) was quantitatively assessed by fluorescence spectroscopy. Drug–DNA binding was determined in 100 mM KCl, 20 mM tris-HCl buffer pH 8.0 at 25 °C. Two µM of compounds were incubated with ctDNA aliquots (5 min) after each DNA addition. Fluorescence spectra were recorded with a Cary Eclipse Fluorescence Spectrometer (Australia). The excitation wavelength was 340 nm (slits 5 nm). Emission was recorded in range 350–600 nm. The concentration of ctDNA was determined in a sodium phosphate buffered solution at 20 °C using the molar extinction coefficient  $\epsilon[\text{ctDNA}] = 13200 \text{ M (base pairs)}^{-1} \cdot \text{cm}^{-1}$ . The concentration of free and bound compounds was determined by changes of ligand fluorescence upon DNA titration. Binding parameters were determined by approximation of DNA concentration dependence of fluorescence with equation  $F/F_0 = 1/(1 + C/K_D)$ .

#### *DNA binding estimation by FID assay*

To study ligand binding, we employed a DNA double helix model using the self-complementary oligonucleotide ds26, d(CAATCGGATCGAATTCGATCCGATTG), which forms a 26-base-pair duplex. DNA–ligand interactions were screened using the thiazole orange (TO) displacement assay (FID method) [7]. This assay is based on the competitive binding of the test ligand and TO, a known fluorescent intercalator, to DNA. TO fluorescence was recorded at 530 nm (emission slit width 20 nm) with excitation at 480 nm (excitation slit width 10 nm) using a TECAN Spark microplate fluorometer at room temperature. Each test sample contained DNA (0.1  $\mu$ M), TO (1  $\mu$ M), and compound (25  $\mu$ M). Data represent the average of three independent measurements.

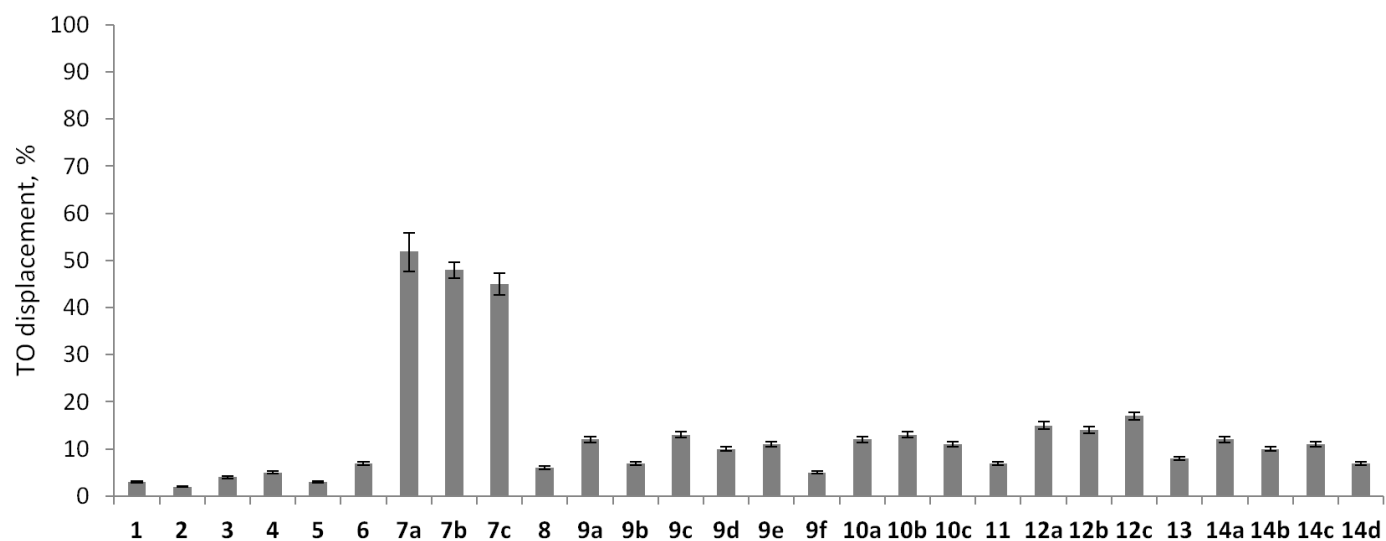

**Figure S1.** Thiazole orange (TO) displacement from DNA duplex (ds26) by the compounds at 25  $\mu\text{M}$  at 20  $^{\circ}\text{C}$ .

A

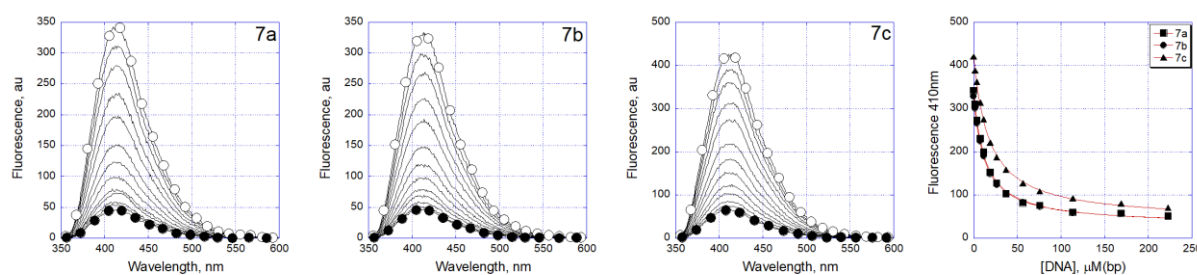

B

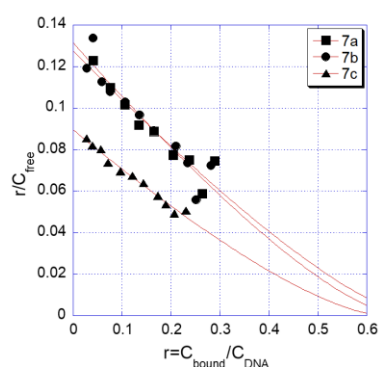

| Compound  | $K_a$ , $10^5 \text{ M}^{-1}$ | $K_D$ , $\mu\text{M}$ | L, bp           |
|-----------|-------------------------------|-----------------------|-----------------|
| <b>7a</b> | $1.2 \pm 0.1$                 | $8.3 \pm 0.7$         | $1.4 \pm 0.1$   |
| <b>7b</b> | $1.3 \pm 0.1$                 | $7.7 \pm 0.6$         | $1.5 \pm 0.1$   |
| <b>7c</b> | $0.9 \pm 0.1$                 | $11.1 \pm 1.2$        | $1.57 \pm 0.05$ |

**Figure S2.** (A) Fluorescence titration of compounds **7a–c** (5  $\mu\text{M}$ ) with calf thymus DNA at low ionic strength. Spectra were recorded upon addition of DNA (0–220  $\mu\text{M}$  base pairs) in 20 mM Tris-HCl buffer (pH 8.0) at 20  $^{\circ}\text{C}$ . (B) Scatchard plot of the binding isotherm derived from the fluorescence titration data. The table presents the binding parameters obtained by approximation with the McGhee–von Hippel equation [6].



## References:

1. Bergman, J.; Carlsson, R.; Sjöberg, B. *J. Heterocycl. Chem.* **1977**, 14, 1123-1134. DOI: 10.1002/jhet.5570140701.
2. Xu, M.; Hou, Q.; Wang, S.; Wang, H.; Yao, Z.-J. *Synthesis* **2011**, 4, 626-634. DOI: 10.1055/s-0030-1258411.
3. Duncan, R. L.; Helsley, G. C.; Boswell, R. F. *J. Heterocycl. Chem.* **1973**, 10, 65-70. DOI: 10.1002/jhet.5570100115.
4. Tikhomirov, A. S.; Shchekotikhin, A. E.; Lee, Y. H.; Chen, Y. A.; Yeh, C. A.; Tatarskiy, V. V.; Dezhenkova, L. G.; Glazunova, V. A.; Balzarini, J.; Shtil, A. A.; Preobrazhenskaya, M. N.; Chueh, P. J. *J. Med. Chem.* **2015**, 58, 9522-9534. DOI: 10.1021/acs.jmedchem.5b00859.
5. Tikhomirov, A.S.; Sinkevich, Y.B.; Dezhenkova, L.G.; Kaluzhny, D.N.; Ilyinsky, N.S.; Borshchevskiy, V.I.; Schols, D.; Shchekotikhin, A.E. *Eur. J. Med. Chem.* **2024**, 265, 116103, <https://doi.org/10.1016/j.ejmech.2023.116103>.
6. McGhee J. D., von Hippel P. H. *J. Mol. Biol.* **1974**, 86, 469-489.
7. Monchaud, D.; Teulade-Fichou, M.-P. *Methods Mol. Biol.* **2010**, 608, 257, [https://doi.org/10.1007/978-1-59745-363-9\\_15](https://doi.org/10.1007/978-1-59745-363-9_15)

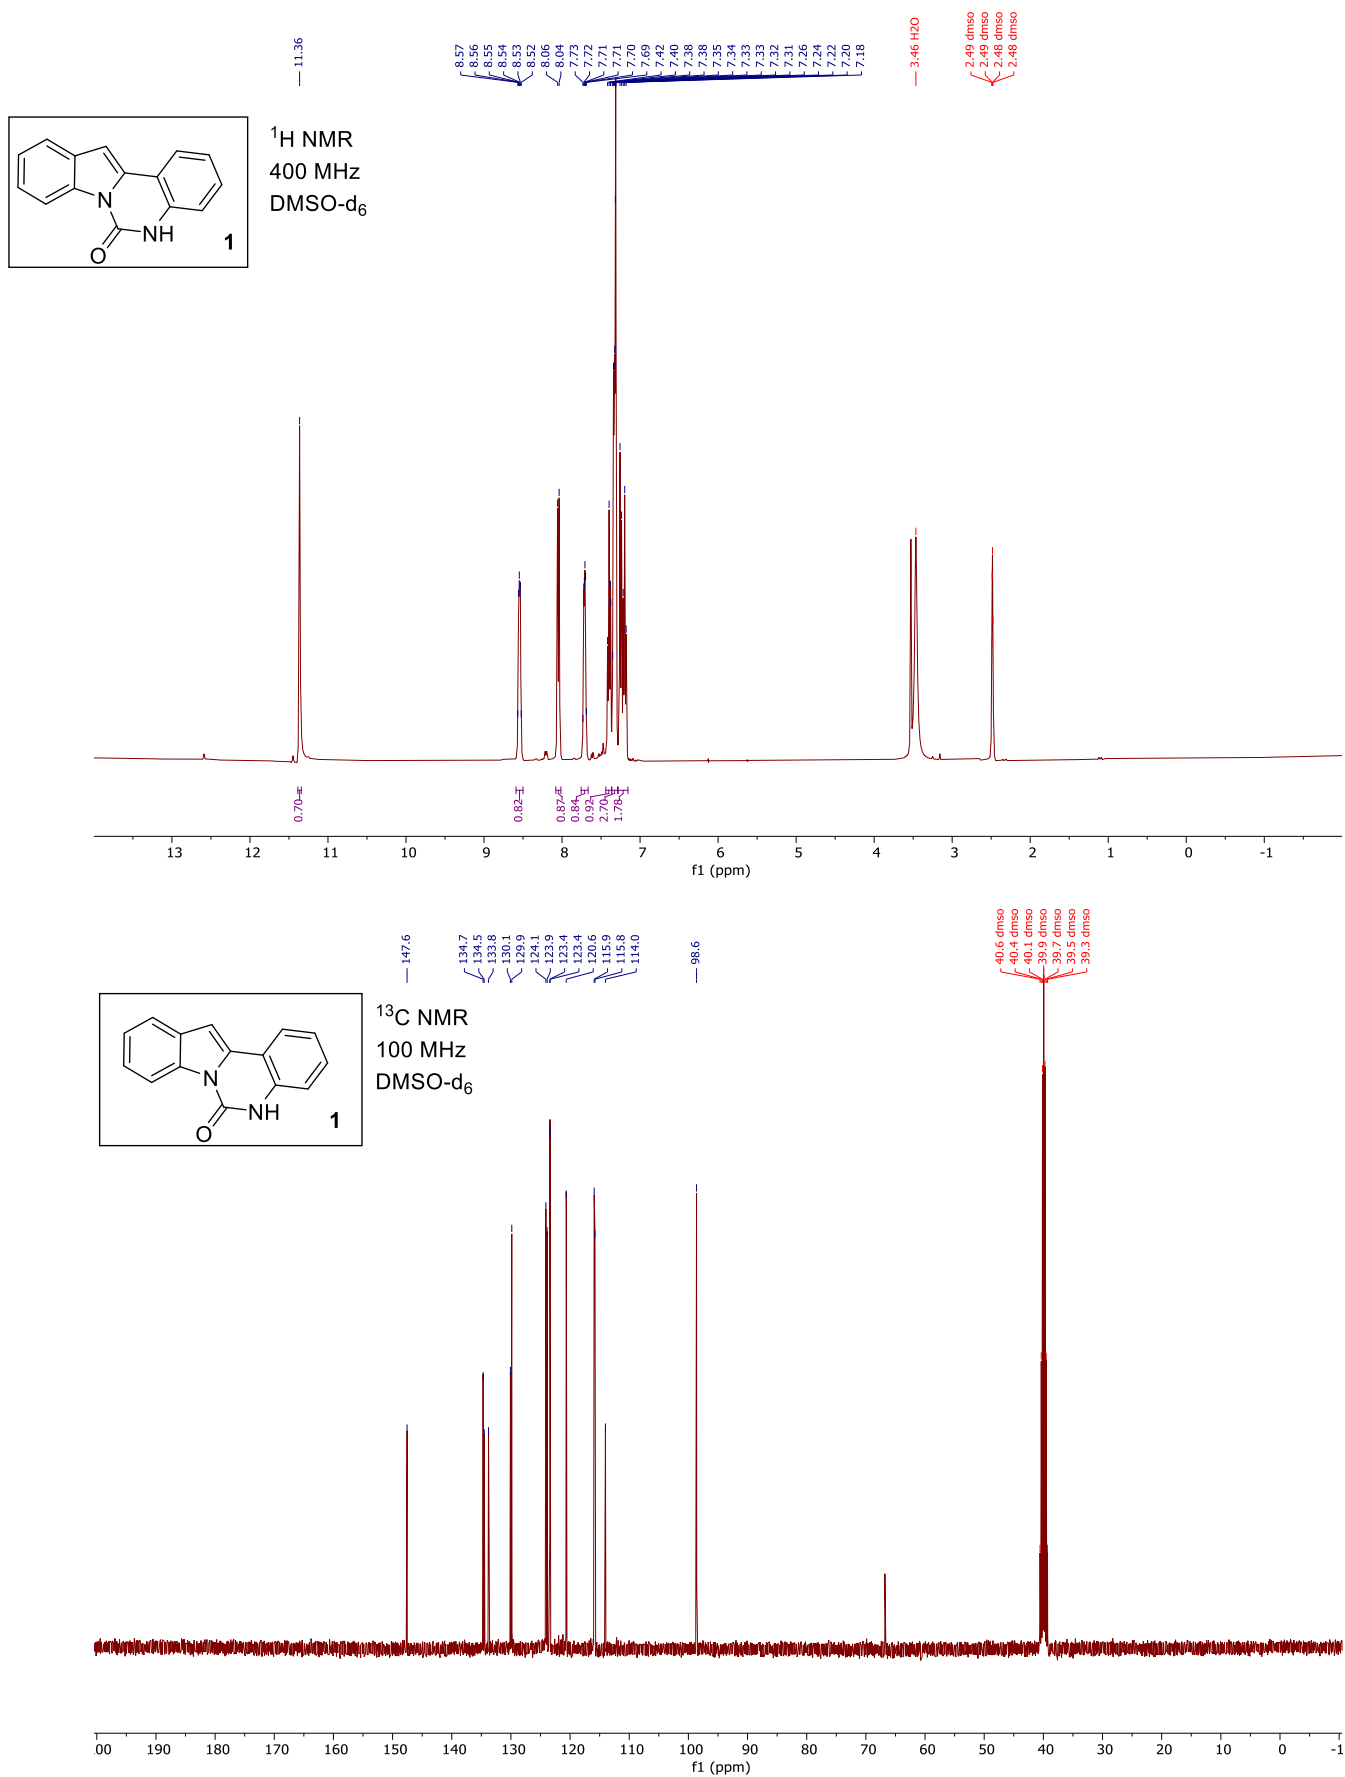

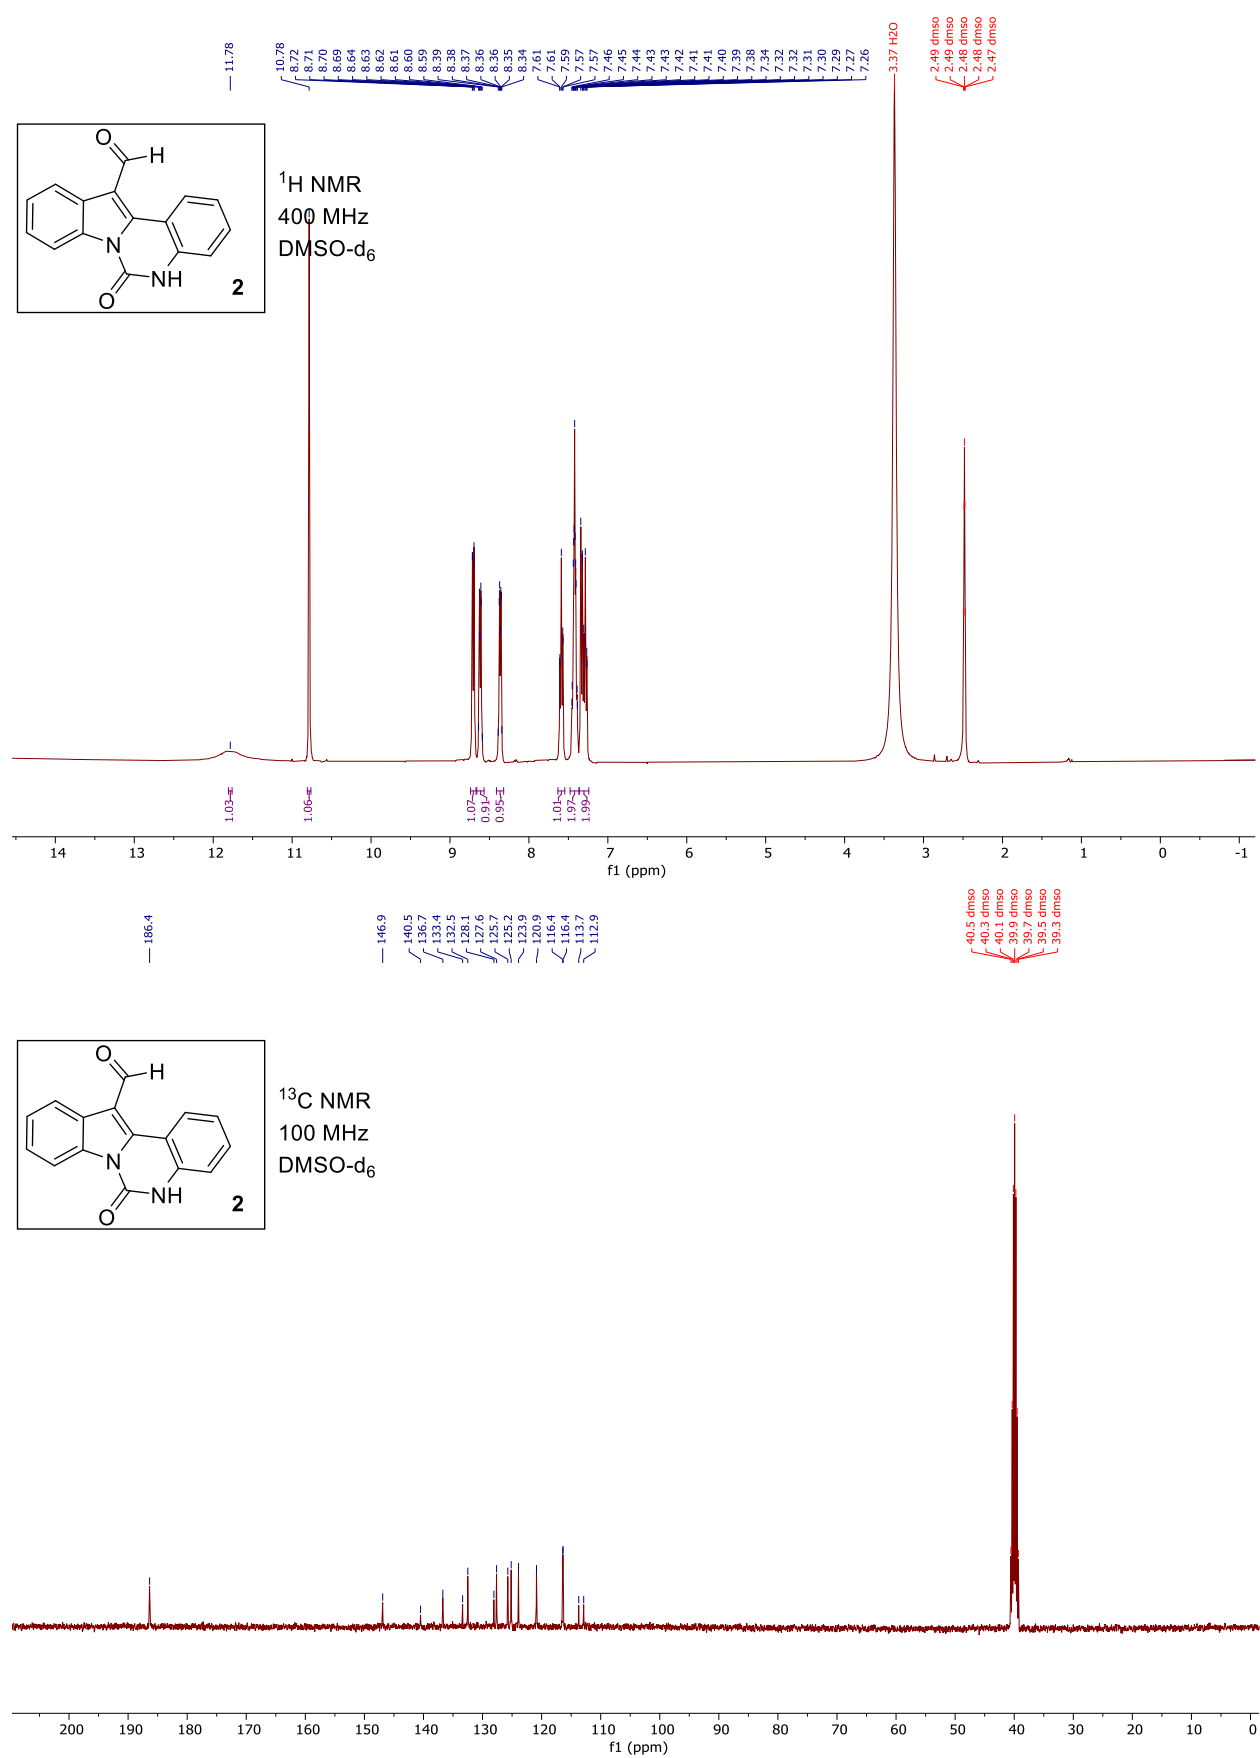

**Figure S4.** <sup>1</sup>H and <sup>13</sup>C NMR spectra of compound **2**.

## Compound Spectrum List Report

### Analysis Info

Analysis Name D:\Data\AST\KDV-18.d  
 Method tune\_low\_norm.m  
 Sample Name Tune wide  
 Comment

Acquisition Date 6/26/2025

Operator Mitrokhov  
 Instrument / Ser# microTOF-Q II 10225

### Acquisition Parameter

|             |          |                       |           |                  |           |
|-------------|----------|-----------------------|-----------|------------------|-----------|
| Source Type | ESI      | Ion Polarity          | Positive  | Set Nebulizer    | 0.4 Bar   |
| Focus       | Active   | Set Capillary         | 4500 V    | Set Dry Heater   | 180 °C    |
| Scan Begin  | 50 m/z   | Set End Plate Offset  | -500 V    | Set Dry Gas      | 4.0 l/min |
| Scan End    | 3000 m/z | Set Collision Cell RF | 150.0 Vpp | Set Divert Valve | Source    |

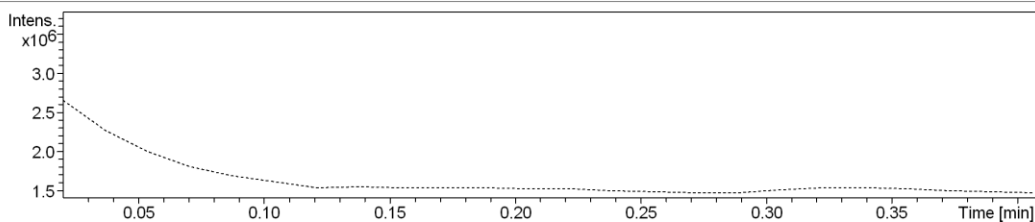

| #    | RT [min] | Area | Max. m/z |
|------|----------|------|----------|
| n.a. | 0.2      | n.a. | 263.0829 |

### +MS, 0.1-0.3min #(5-19)

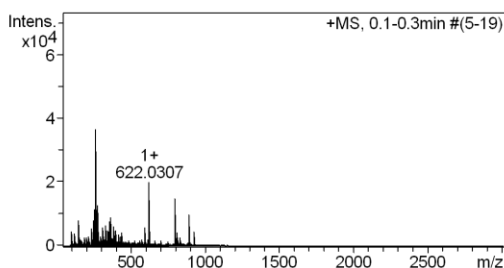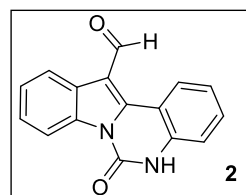

| #  | m/z      | I     | I %   |
|----|----------|-------|-------|
| 1  | 149.0273 | 7929  | 21.7  |
| 2  | 249.0696 | 7948  | 21.7  |
| 3  | 258.1761 | 11416 | 31.2  |
| 4  | 263.0829 | 36572 | 100.0 |
| 5  | 264.0929 | 8192  | 22.4  |
| 6  | 279.0803 | 12734 | 34.8  |
| 7  | 361.2233 | 8727  | 23.9  |
| 8  | 622.0307 | 19978 | 54.6  |
| 9  | 796.4235 | 14894 | 40.7  |
| 10 | 891.5323 | 9711  | 26.6  |

**Figure S5.** Copy of HRMS (ESI) spectra of compound **2**.

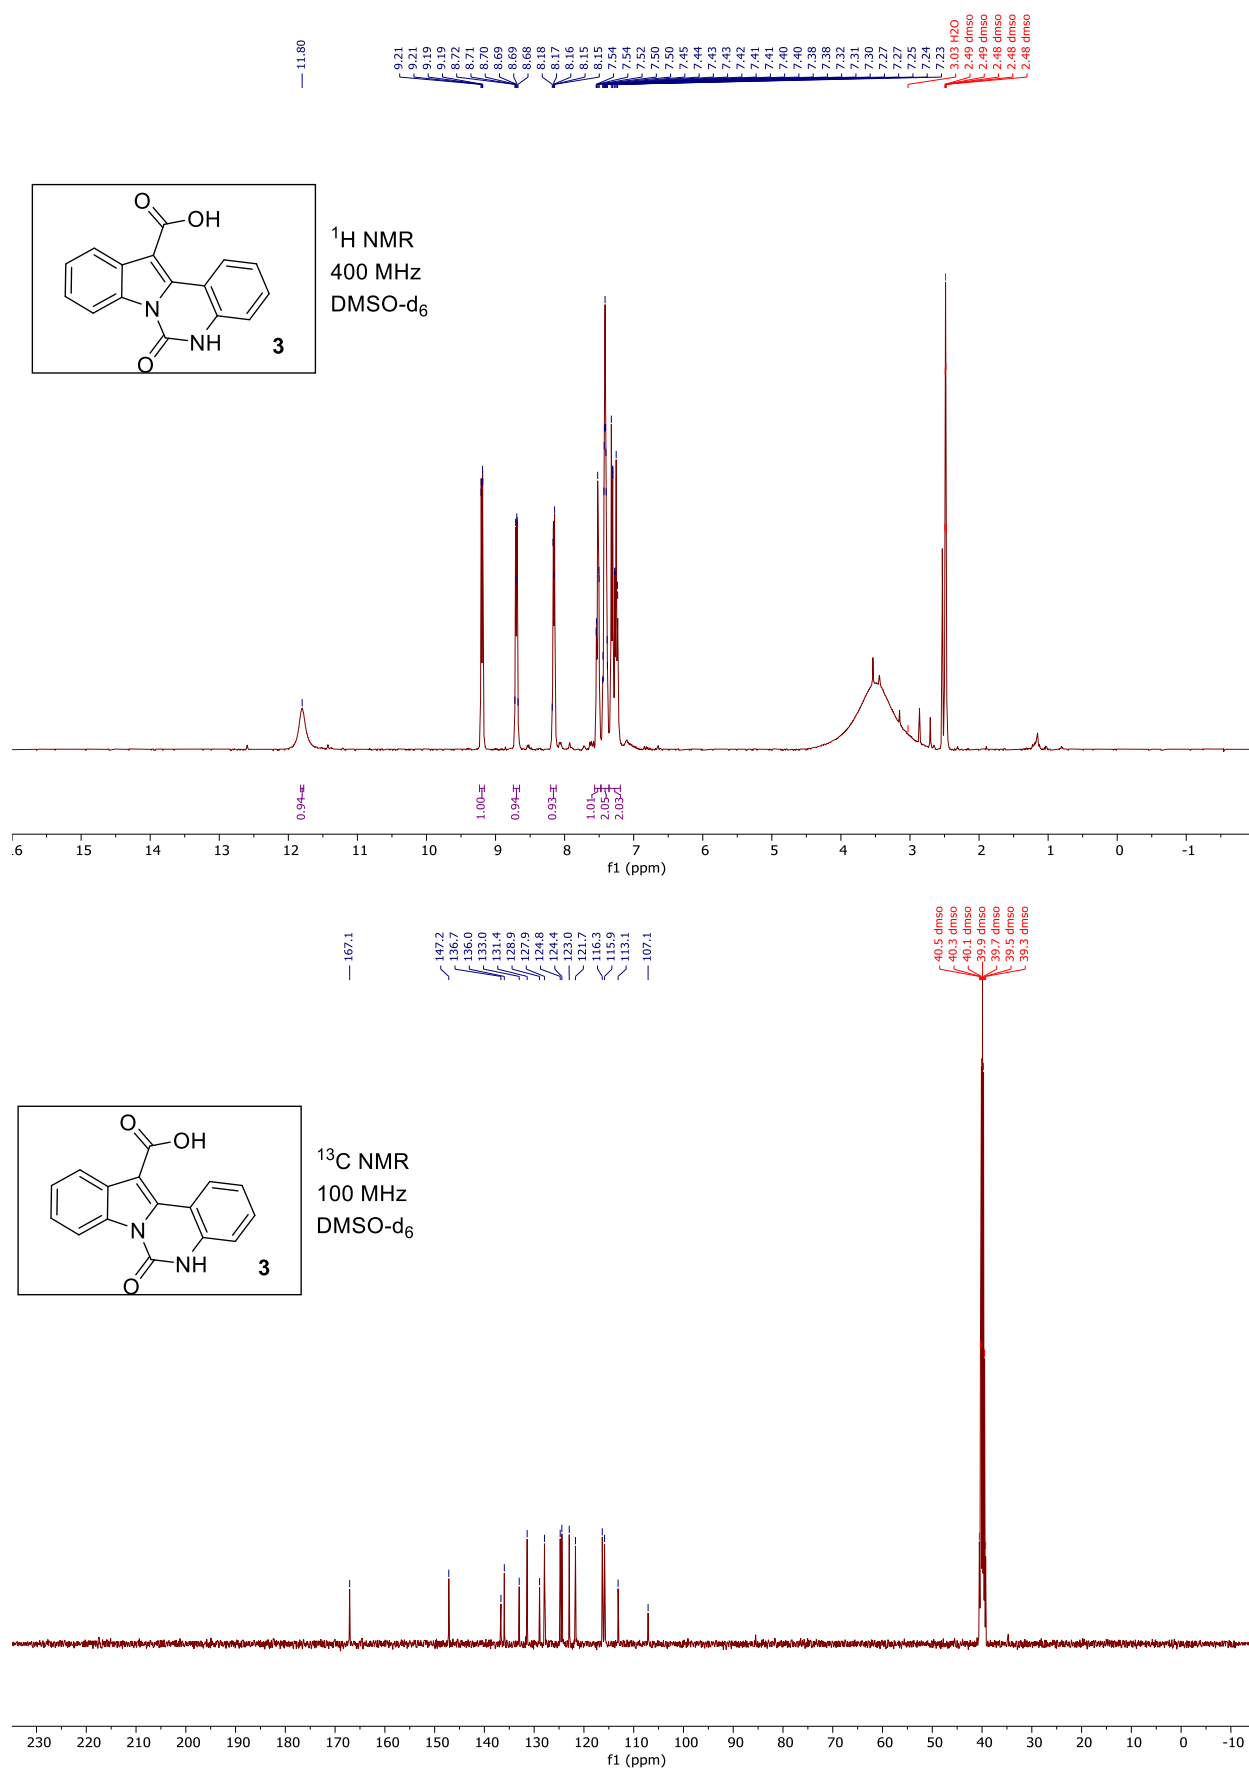

**Figure S6.** <sup>1</sup>H and <sup>13</sup>C NMR spectra of compound **3**.

## Compound Spectrum List Report

### Analysis Info

Analysis Name D:\Data\AST\KDV-22.d  
 Method tune\_low\_norm.m  
 Sample Name Tune wide  
 Comment

Acquisition Date 6/27/2025

Operator Mitrokhov  
 Instrument / Ser# microTOF-Q II 10225

### Acquisition Parameter

|             |          |                       |           |                  |           |
|-------------|----------|-----------------------|-----------|------------------|-----------|
| Source Type | ESI      | Ion Polarity          | Positive  | Set Nebulizer    | 0.4 Bar   |
| Focus       | Active   | Set Capillary         | 4500 V    | Set Dry Heater   | 180 °C    |
| Scan Begin  | 50 m/z   | Set End Plate Offset  | -500 V    | Set Dry Gas      | 4.0 l/min |
| Scan End    | 3000 m/z | Set Collision Cell RF | 150.0 Vpp | Set Divert Valve | Source    |

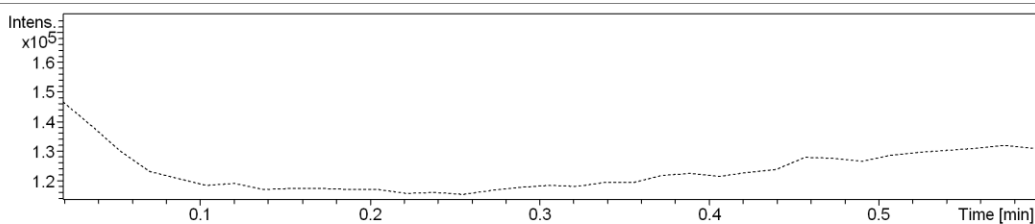

| #    | RT [min] | Area | Max. m/z |
|------|----------|------|----------|
| n.a. | 0.2      | n.a. | 235.0900 |

### +MS, 0.1-0.3min #(4-15)

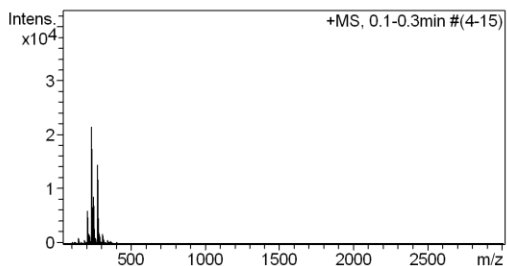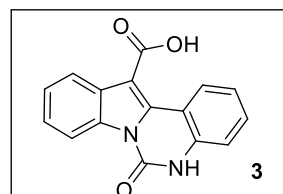

| #  | m/z      | I     | I %   |
|----|----------|-------|-------|
| 1  | 209.1104 | 5891  | 27.5  |
| 2  | 219.0936 | 1435  | 6.7   |
| 3  | 223.0896 | 1425  | 6.6   |
| 4  | 235.0900 | 21459 | 100.0 |
| 5  | 236.0925 | 3918  | 18.3  |
| 6  | 249.0695 | 8470  | 39.5  |
| 7  | 279.0780 | 14479 | 67.5  |
| 8  | 280.0806 | 2397  | 11.2  |
| 9  | 287.0804 | 1564  | 7.3   |
| 10 | 313.2745 | 1677  | 7.8   |

**Figure S7.** Copy of HRMS (ESI) spectra of compound **3**.

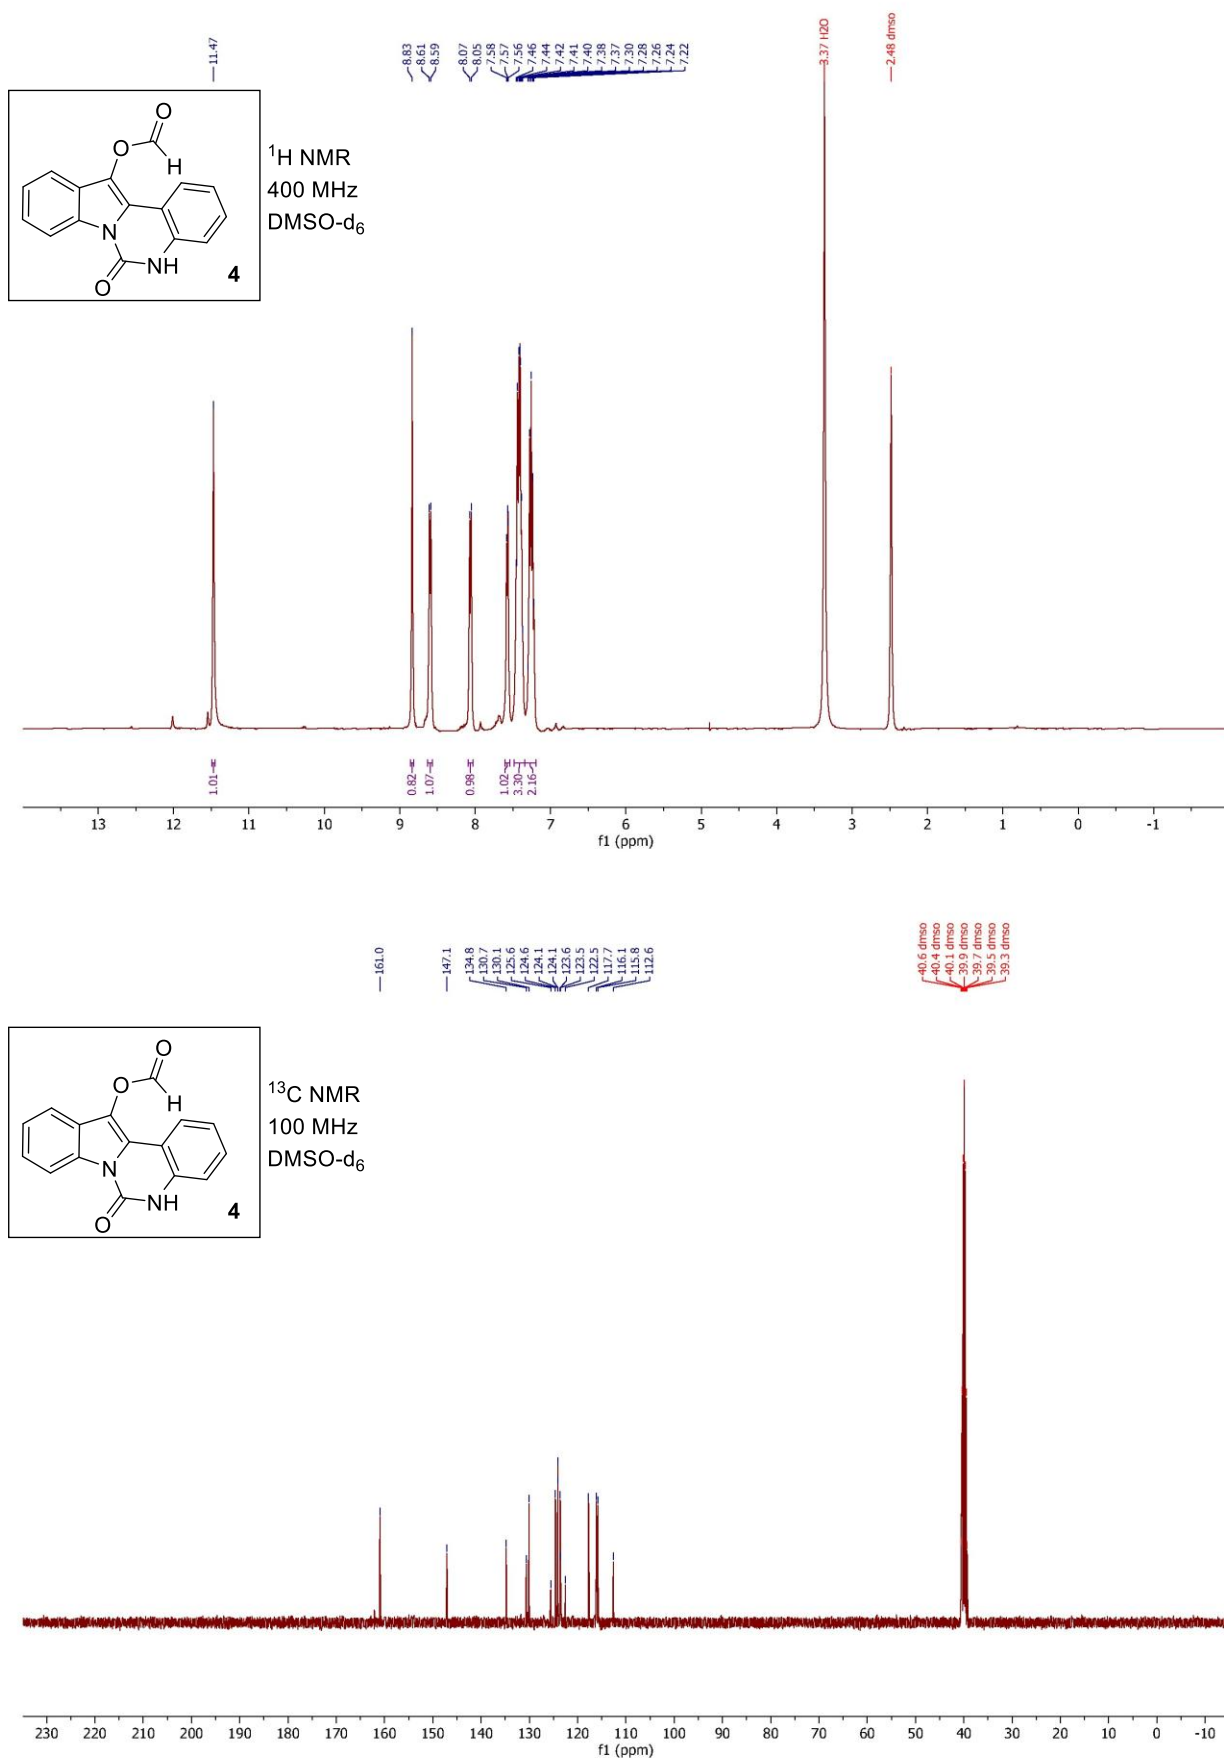

**Figure S8.** <sup>1</sup>H and <sup>13</sup>C NMR spectra of compound **4**.

## Compound Spectrum List Report

### Analysis Info

Analysis Name D:\Data\AST\KDV-20.d  
 Method tune\_low\_norm.m  
 Sample Name Tune wide  
 Comment

Acquisition Date 6/26/2025

Operator Mitrokhov  
 Instrument / Ser# microTOF-Q II 10225

### Acquisition Parameter

|             |          |                       |           |                  |           |
|-------------|----------|-----------------------|-----------|------------------|-----------|
| Source Type | ESI      | Ion Polarity          | Positive  | Set Nebulizer    | 0.4 Bar   |
| Focus       | Active   | Set Capillary         | 4500 V    | Set Dry Heater   | 180 °C    |
| Scan Begin  | 50 m/z   | Set End Plate Offset  | -500 V    | Set Dry Gas      | 4.0 l/min |
| Scan End    | 3000 m/z | Set Collision Cell RF | 150.0 Vpp | Set Divert Valve | Source    |

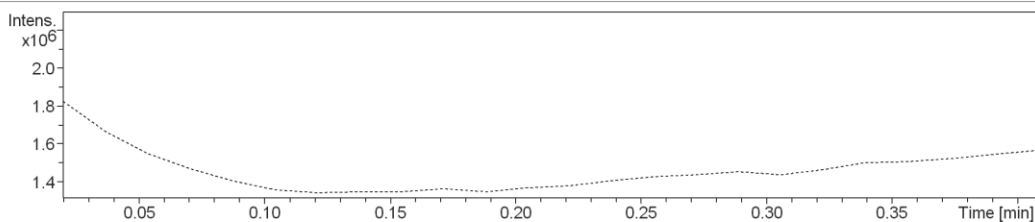

| #    | RT [min] | Area | Max. m/z |
|------|----------|------|----------|
| n.a. | 0.2      | n.a. | 279.0772 |

### +MS, 0.1-0.3min #(4-18)

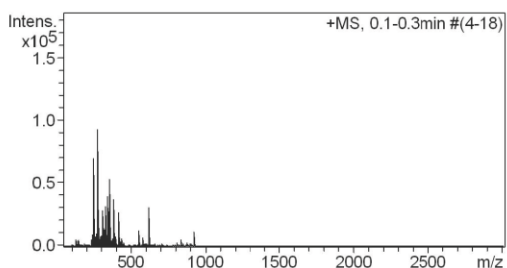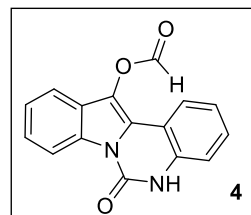

| #  | m/z      | I     | I %   |
|----|----------|-------|-------|
| 1  | 249.0704 | 69922 | 75.2  |
| 2  | 279.0772 | 92937 | 100.0 |
| 3  | 313.2764 | 27925 | 30.0  |
| 4  | 331.2872 | 31412 | 33.8  |
| 5  | 341.3079 | 39551 | 42.6  |
| 6  | 353.2683 | 27170 | 29.2  |
| 7  | 359.3188 | 53057 | 57.1  |
| 8  | 381.3004 | 36821 | 39.6  |
| 9  | 418.2895 | 26372 | 28.4  |
| 10 | 622.0339 | 30171 | 32.5  |

**Figure S9.** Copy of HRMS (ESI) spectra of compound **4**.



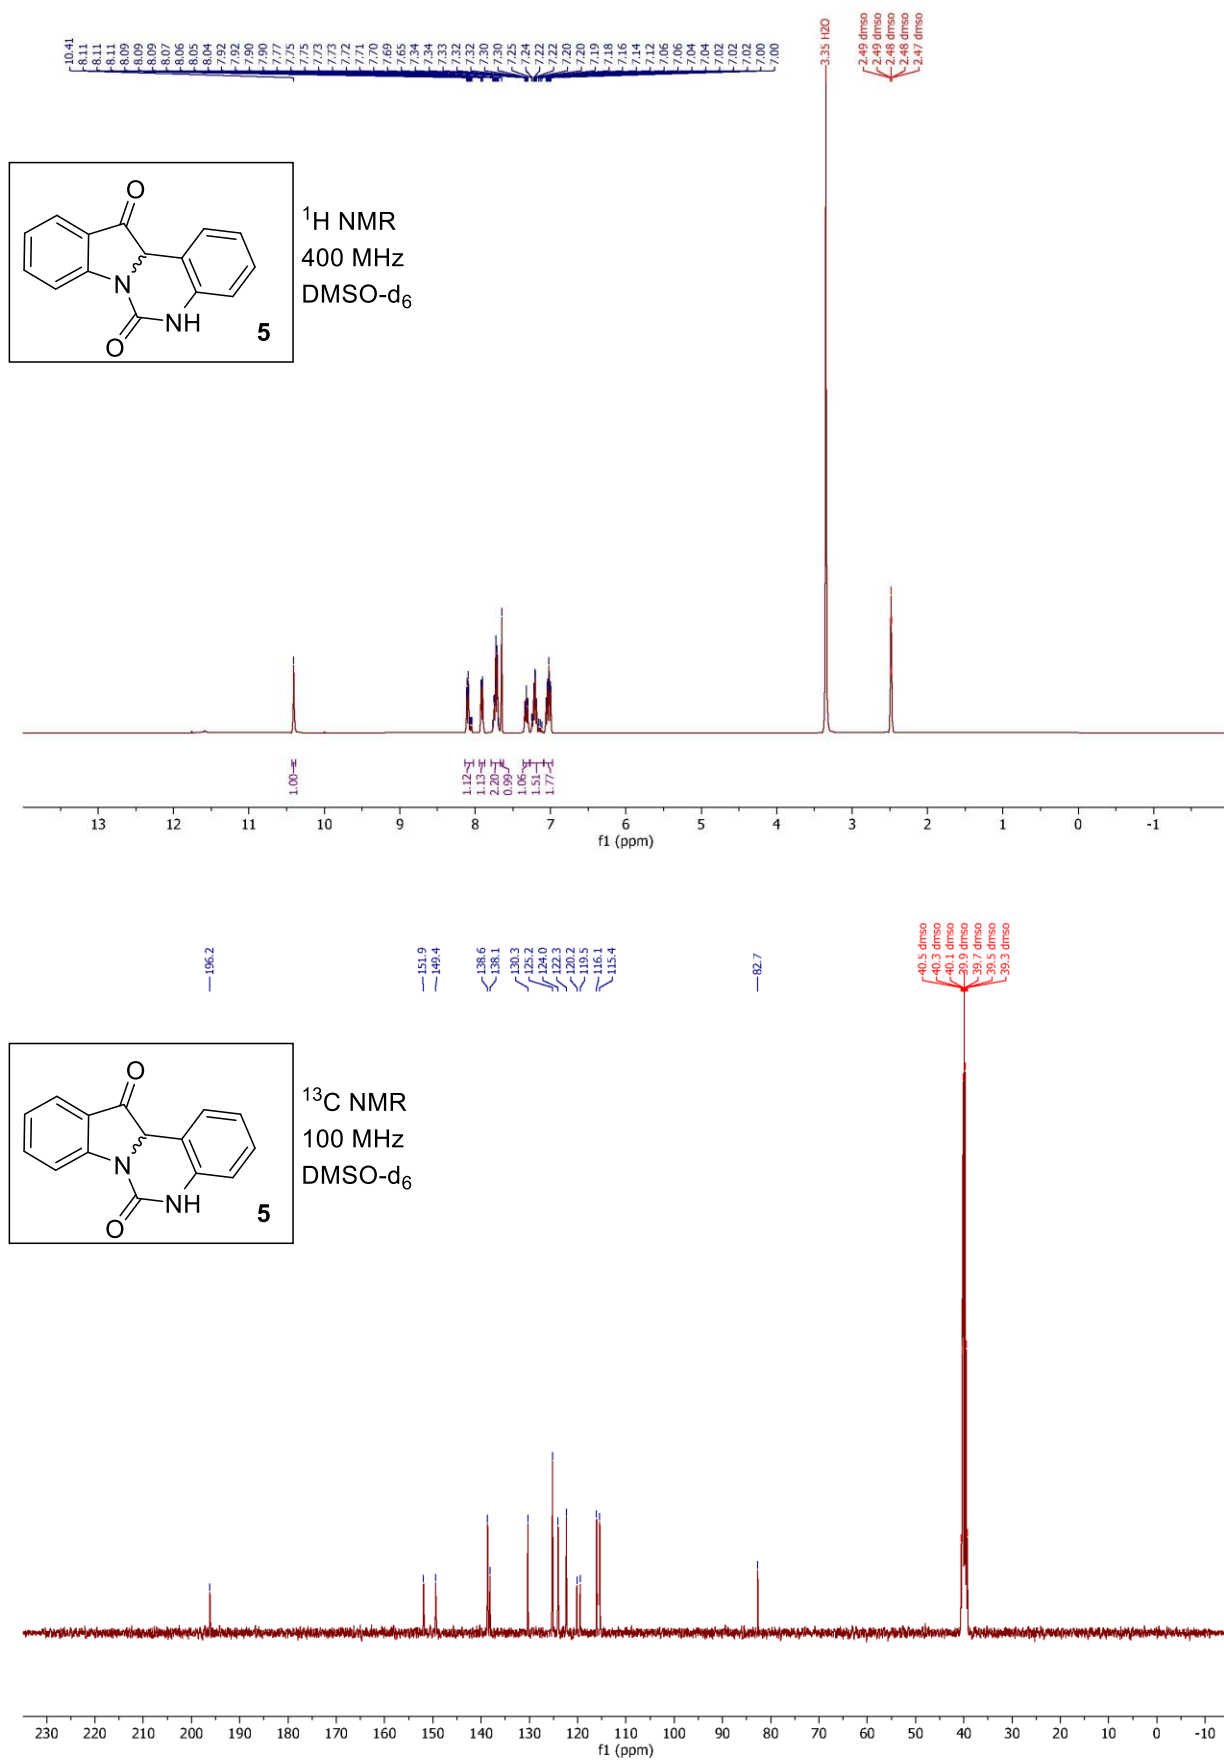

**Figure S10.** <sup>1</sup>H and <sup>13</sup>C NMR spectra of compound **5**.

## Compound Spectrum List Report

### Analysis Info

Analysis Name D:\Data\AST\AST-739.d  
 Method tune\_low\_norm.m  
 Sample Name Tune wide  
 Comment

Acquisition Date 6/28/2025

Operator Mitrokhov  
 Instrument / Ser# microTOF-Q II 10225

### Acquisition Parameter

|             |          |                       |           |                  |           |
|-------------|----------|-----------------------|-----------|------------------|-----------|
| Source Type | ESI      | Ion Polarity          | Positive  | Set Nebulizer    | 0.4 Bar   |
| Focus       | Active   | Set Capillary         | 4500 V    | Set Dry Heater   | 180 °C    |
| Scan Begin  | 50 m/z   | Set End Plate Offset  | -500 V    | Set Dry Gas      | 4.0 l/min |
| Scan End    | 3000 m/z | Set Collision Cell RF | 150.0 Vpp | Set Divert Valve | Source    |

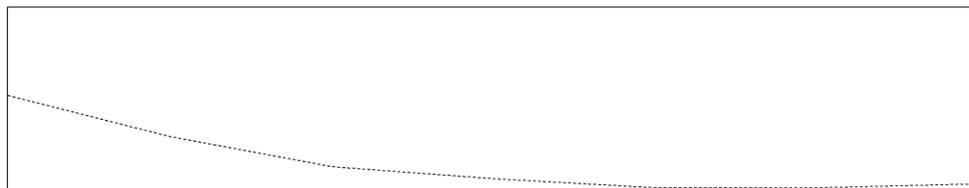

| #    | RT [min] | Area | Max. m/z |
|------|----------|------|----------|
| n.a. | 0.1      | n.a. | 251.0802 |

### +MS, 0.0-0.1min #(2-6)

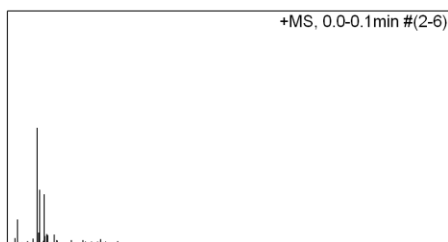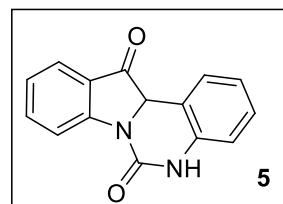

| #  | m/z      | I       | I %   |
|----|----------|---------|-------|
| 1  | 118.0880 | 228336  | 21.3  |
| 2  | 251.0802 | 1073124 | 100.0 |
| 3  | 255.0710 | 161475  | 15.0  |
| 4  | 258.1750 | 108158  | 10.1  |
| 5  | 265.0638 | 497397  | 46.4  |
| 6  | 297.0900 | 457848  | 42.7  |
| 7  | 298.0926 | 76043   | 7.1   |
| 8  | 314.1151 | 93748   | 8.7   |
| 9  | 319.0687 | 85038   | 7.9   |
| 10 | 361.2224 | 86599   | 8.1   |

**Figure S11.** Copy of HRMS (ESI) spectra of compound **5**.

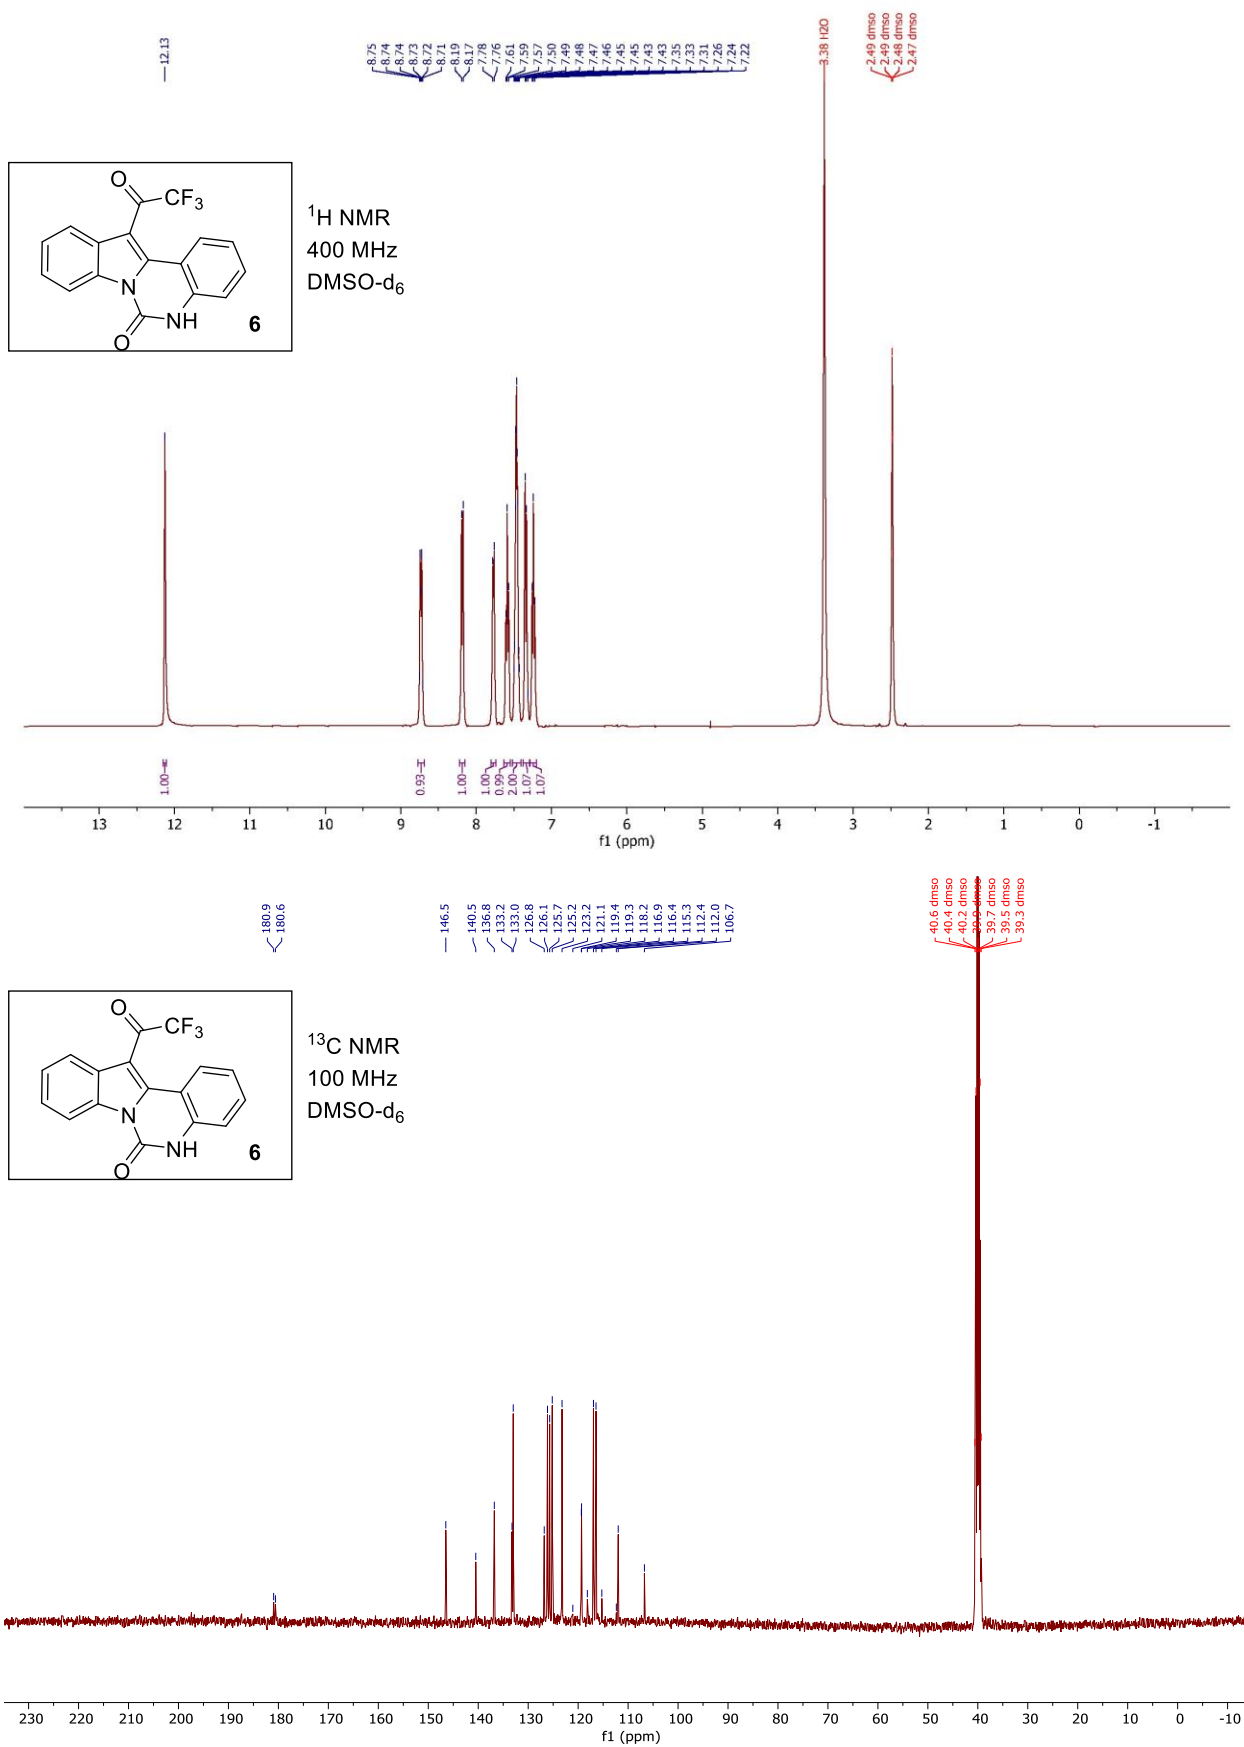

**Figure S12.** <sup>1</sup>H and <sup>13</sup>C NMR spectra of compound **6**.

## Compound Spectrum List Report

### Analysis Info

Analysis Name D:\Data\AST\KDV-21.d  
 Method tune\_norm.m  
 Sample Name Tune wide  
 Comment

Acquisition Date 6/29/2025

Operator Mitrokhov  
 Instrument / Ser# microTOF-Q II 10225

### Acquisition Parameter

|             |          |                       |           |                  |           |
|-------------|----------|-----------------------|-----------|------------------|-----------|
| Source Type | ESI      | Ion Polarity          | Positive  | Set Nebulizer    | 0.4 Bar   |
| Focus       | Active   | Set Capillary         | 4500 V    | Set Dry Heater   | 180 °C    |
| Scan Begin  | 50 m/z   | Set End Plate Offset  | -500 V    | Set Dry Gas      | 4.0 l/min |
| Scan End    | 3000 m/z | Set Collision Cell RF | 550.0 Vpp | Set Divert Valve | Source    |

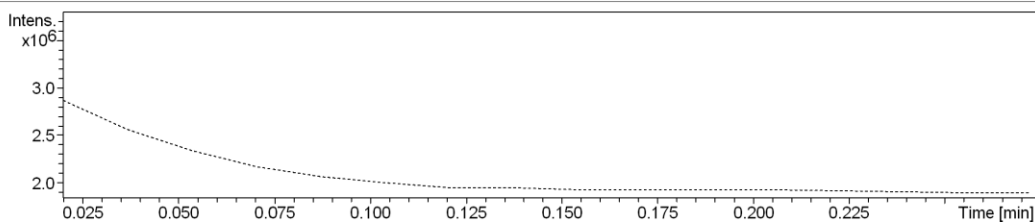

| #    | RT [min] | Area | Int. Type        | Intens. | S/N  | Chromatogram | Max. m/z |
|------|----------|------|------------------|---------|------|--------------|----------|
| n.a. | 0.2      | n.a. | Average spectrum | n.a.    | n.a. | n.a.         | 341.3058 |

### +MS, 0.1-0.3min #(3-16)

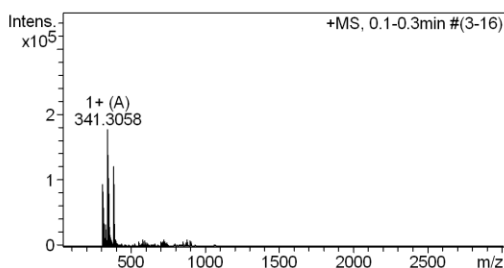

| #  | m/z      | Res.  | S/N    | I      | I %   |
|----|----------|-------|--------|--------|-------|
| 1  | 313.2742 | 10036 | 1371.0 | 93304  | 52.6  |
| 2  | 331.0693 | 9372  | 438.4  | 32860  | 18.5  |
| 3  | 341.3058 | 10487 | 2253.9 | 177522 | 100.0 |
| 4  | 342.3080 | 8534  | 478.7  | 37776  | 21.3  |
| 5  | 349.0795 | 9380  | 292.6  | 23372  | 13.2  |
| 6  | 353.2657 | 9722  | 1281.7 | 103068 | 58.1  |
| 7  | 354.2689 | 8632  | 258.0  | 20795  | 11.7  |
| 8  | 359.3142 | 9047  | 257.9  | 20964  | 11.8  |
| 9  | 381.2968 | 10194 | 1431.9 | 120676 | 68.0  |
| 10 | 382.2993 | 9475  | 343.2  | 28988  | 16.3  |

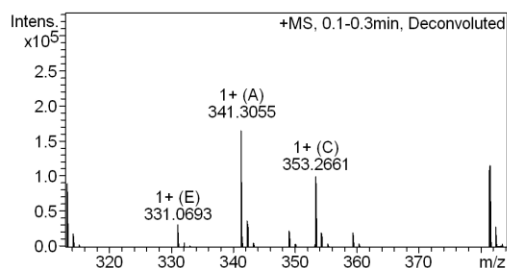

| # | m/z      | Res. | S/N | I      | I %   |
|---|----------|------|-----|--------|-------|
| 1 | 313.2740 |      |     | 93303  | 52.6  |
| 2 | 331.0693 |      |     | 32860  | 18.5  |
| 3 | 341.3055 |      |     | 177522 | 100.0 |
| 4 | 349.0793 |      |     | 23371  | 13.2  |
| 5 | 353.2661 |      |     | 103067 | 58.1  |
| 6 | 359.3141 |      |     | 20964  | 11.8  |
| 7 | 381.2965 |      |     | 120676 | 68.0  |

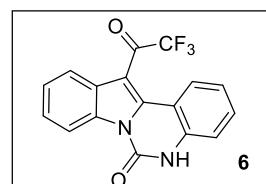

**Figure S13.** Copy of HRMS (ESI) spectra of compound **6**.

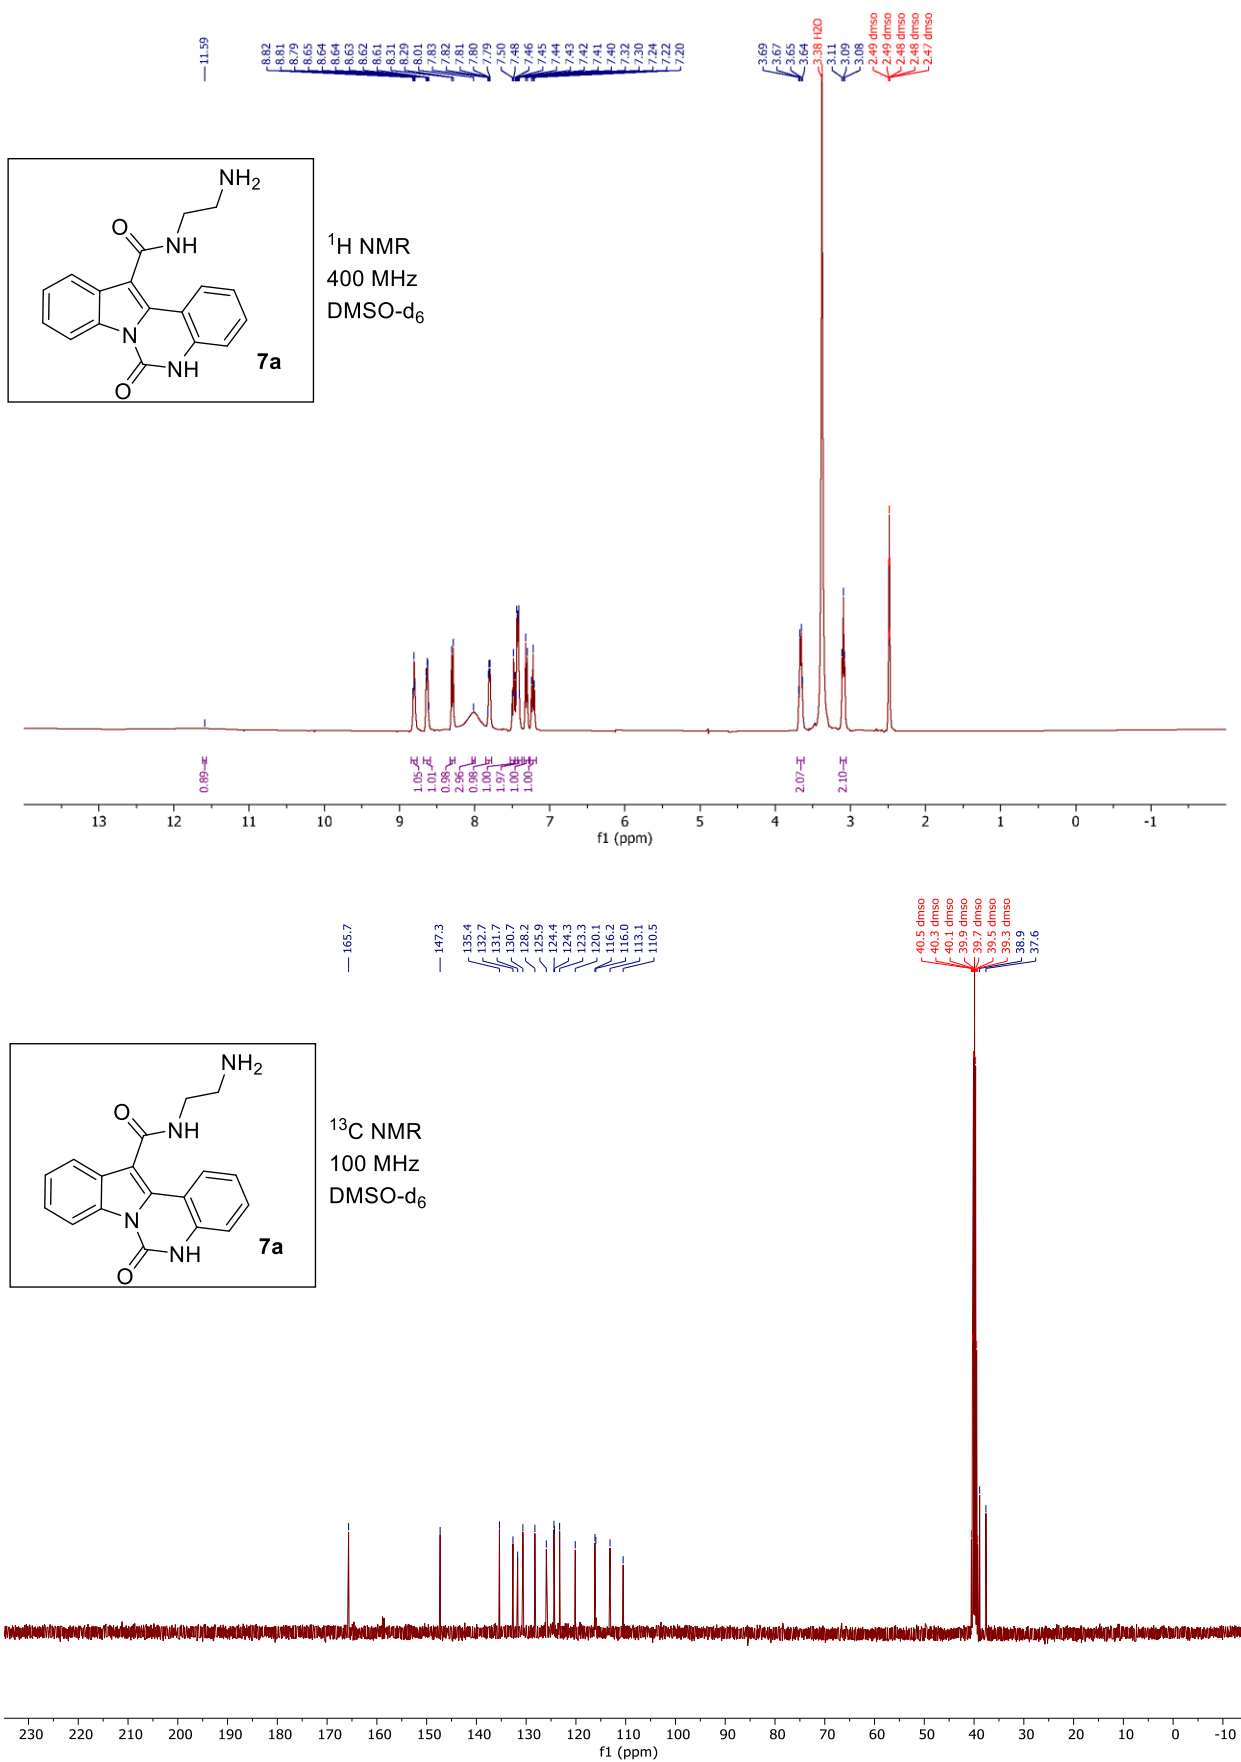

**Figure S14.** <sup>1</sup>H and <sup>13</sup>C NMR spectra of compound **7a**.

## Compound Spectrum List Report

### Analysis Info

Analysis Name D:\Data\AST\KDV-24().d  
 Method tune\_norm.m  
 Sample Name Tune wide  
 Comment

Acquisition Date 6/26/2025

Operator Mitrokhov  
 Instrument / Ser# microTOF-Q II 10225

### Acquisition Parameter

|             |          |                       |           |                  |           |
|-------------|----------|-----------------------|-----------|------------------|-----------|
| Source Type | ESI      | Ion Polarity          | Positive  | Set Nebulizer    | 0.4 Bar   |
| Focus       | Active   | Set Capillary         | 4500 V    | Set Dry Heater   | 180 °C    |
| Scan Begin  | 50 m/z   | Set End Plate Offset  | -500 V    | Set Dry Gas      | 4.0 l/min |
| Scan End    | 3000 m/z | Set Collision Cell RF | 550.0 Vpp | Set Divert Valve | Source    |

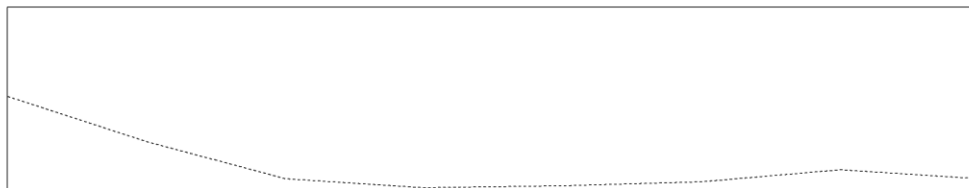

| #    | RT [min] | Area | Int. Type        | Intens. | S/N  | Chromatogram | Max. m/z |
|------|----------|------|------------------|---------|------|--------------|----------|
| n.a. | 0.1      | n.a. | Average spectrum | n.a.    | n.a. | n.a.         | 321.1335 |

### +MS, 0.1-0.1min #(3-8)

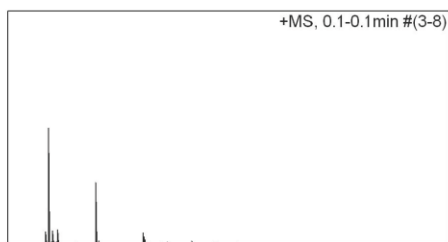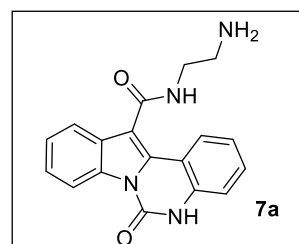

| #  | m/z      | Res.  | S/N     | I       | I %   |
|----|----------|-------|---------|---------|-------|
| 1  | 304.1007 | 10626 | 1800.0  | 233856  | 10.0  |
| 2  | 321.1335 | 13837 | 16395.4 | 2329899 | 100.0 |
| 3  | 322.1317 | 12873 | 4740.1  | 677026  | 29.1  |
| 4  | 353.2572 | 11195 | 1771.8  | 271918  | 11.7  |
| 5  | 381.2880 | 11510 | 1855.1  | 273180  | 11.7  |
| 6  | 641.2544 | 15435 | 7645.6  | 1226926 | 52.7  |
| 7  | 642.2547 | 14082 | 3156.2  | 508005  | 21.8  |
| 8  | 643.2508 | 10479 | 626.6   | 101190  | 4.3   |
| 9  | 961.3723 | 13566 | 1367.3  | 213308  | 9.2   |
| 10 | 962.3726 | 12280 | 899.8   | 140554  | 6.0   |

**Figure S15.** Copy of HRMS (ESI) spectra of compound **7a**.

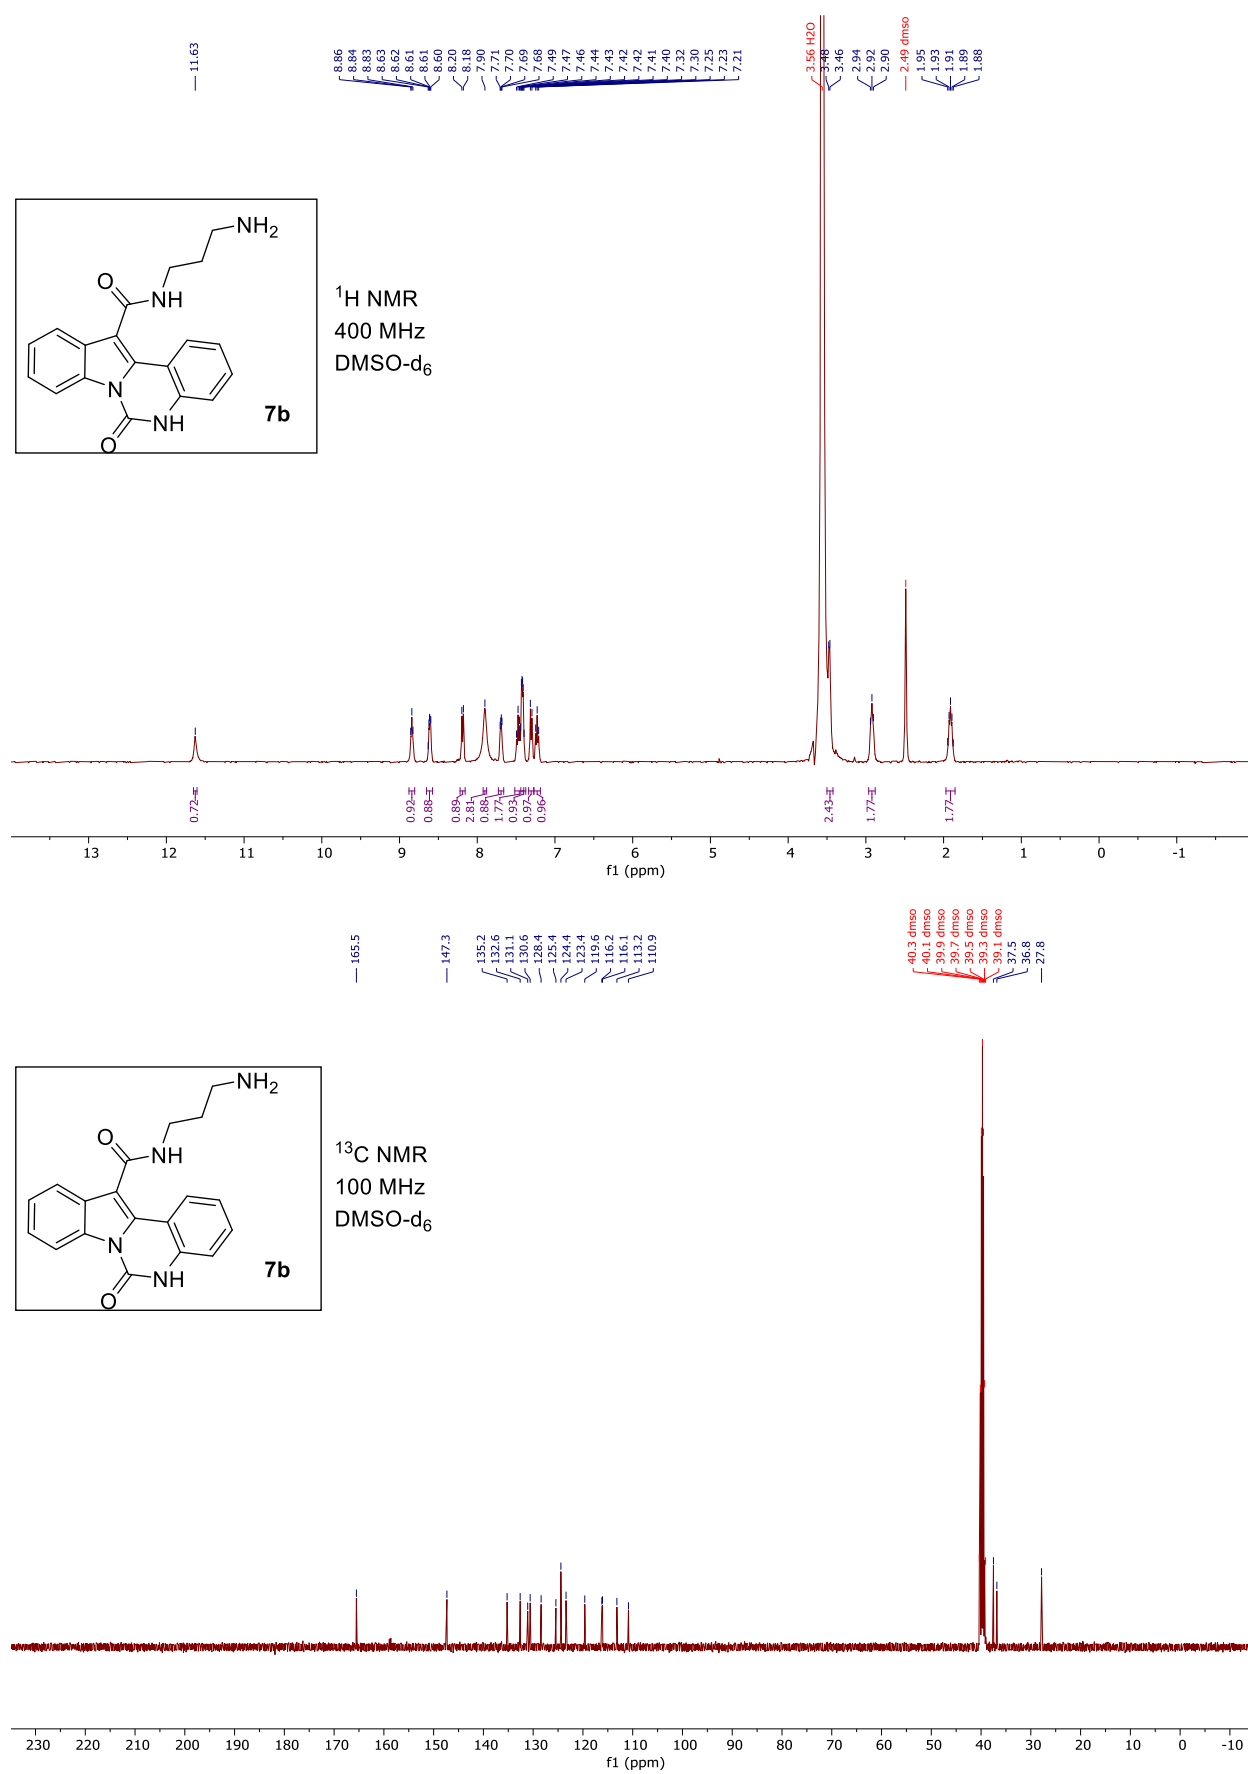

**Figure S16.** <sup>1</sup>H and <sup>13</sup>C NMR spectra of compound **7b**.

## Compound Spectrum List Report

### Analysis Info

Analysis Name D:\Data\AST\KDV-27.d  
 Method tune\_norm.m  
 Sample Name Tune wide  
 Comment

Acquisition Date 6/28/2025

Operator Mitrokhov  
 Instrument / Ser# microTOF-Q II 10225

### Acquisition Parameter

|             |          |                       |           |                  |           |
|-------------|----------|-----------------------|-----------|------------------|-----------|
| Source Type | ESI      | Ion Polarity          | Positive  | Set Nebulizer    | 0.4 Bar   |
| Focus       | Active   | Set Capillary         | 4500 V    | Set Dry Heater   | 180 °C    |
| Scan Begin  | 50 m/z   | Set End Plate Offset  | -500 V    | Set Dry Gas      | 4.0 l/min |
| Scan End    | 3000 m/z | Set Collision Cell RF | 550.0 Vpp | Set Divert Valve | Source    |

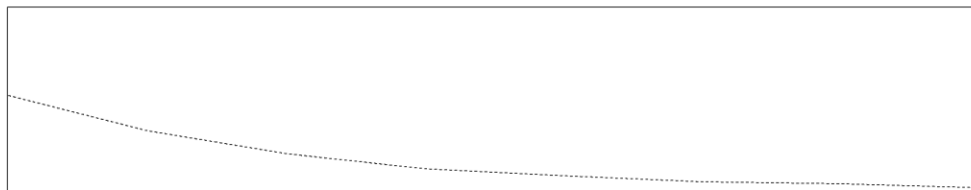

| #    | RT [min] | Area | Int. Type        | Intens. | S/N  | Chromatogram | Max. m/z |
|------|----------|------|------------------|---------|------|--------------|----------|
| n.a. | 0.1      | n.a. | Average spectrum | n.a.    | n.a. | n.a.         | 335.1486 |

### +MS, 0.1-0.1min #(3-8)

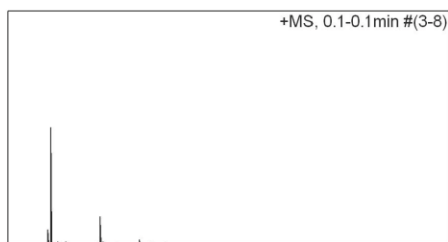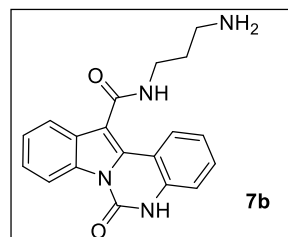

| #  | m/z      | Res.  | S/N     | I       | I %   |
|----|----------|-------|---------|---------|-------|
| 1  | 318.1144 | 11708 | 2866.0  | 321619  | 12.4  |
| 2  | 319.1154 | 9841  | 638.1   | 71992   | 2.8   |
| 3  | 335.1486 | 17021 | 21214.2 | 2587161 | 100.0 |
| 4  | 336.1451 | 14394 | 4966.8  | 608581  | 23.5  |
| 5  | 337.1441 | 9185  | 481.6   | 59311   | 2.3   |
| 6  | 669.2787 | 17169 | 2994.0  | 603620  | 23.3  |
| 7  | 670.2784 | 14220 | 1205.2  | 243723  | 9.4   |
| 8  | 671.2763 | 12170 | 310.2   | 62978   | 2.4   |
| 9  | 929.3248 | 12257 | 455.7   | 88673   | 3.4   |
| 10 | 930.3276 | 12121 | 310.8   | 60457   | 2.3   |

**Figure S17.** Copy of HRMS (ESI) spectra of compound **7b**.



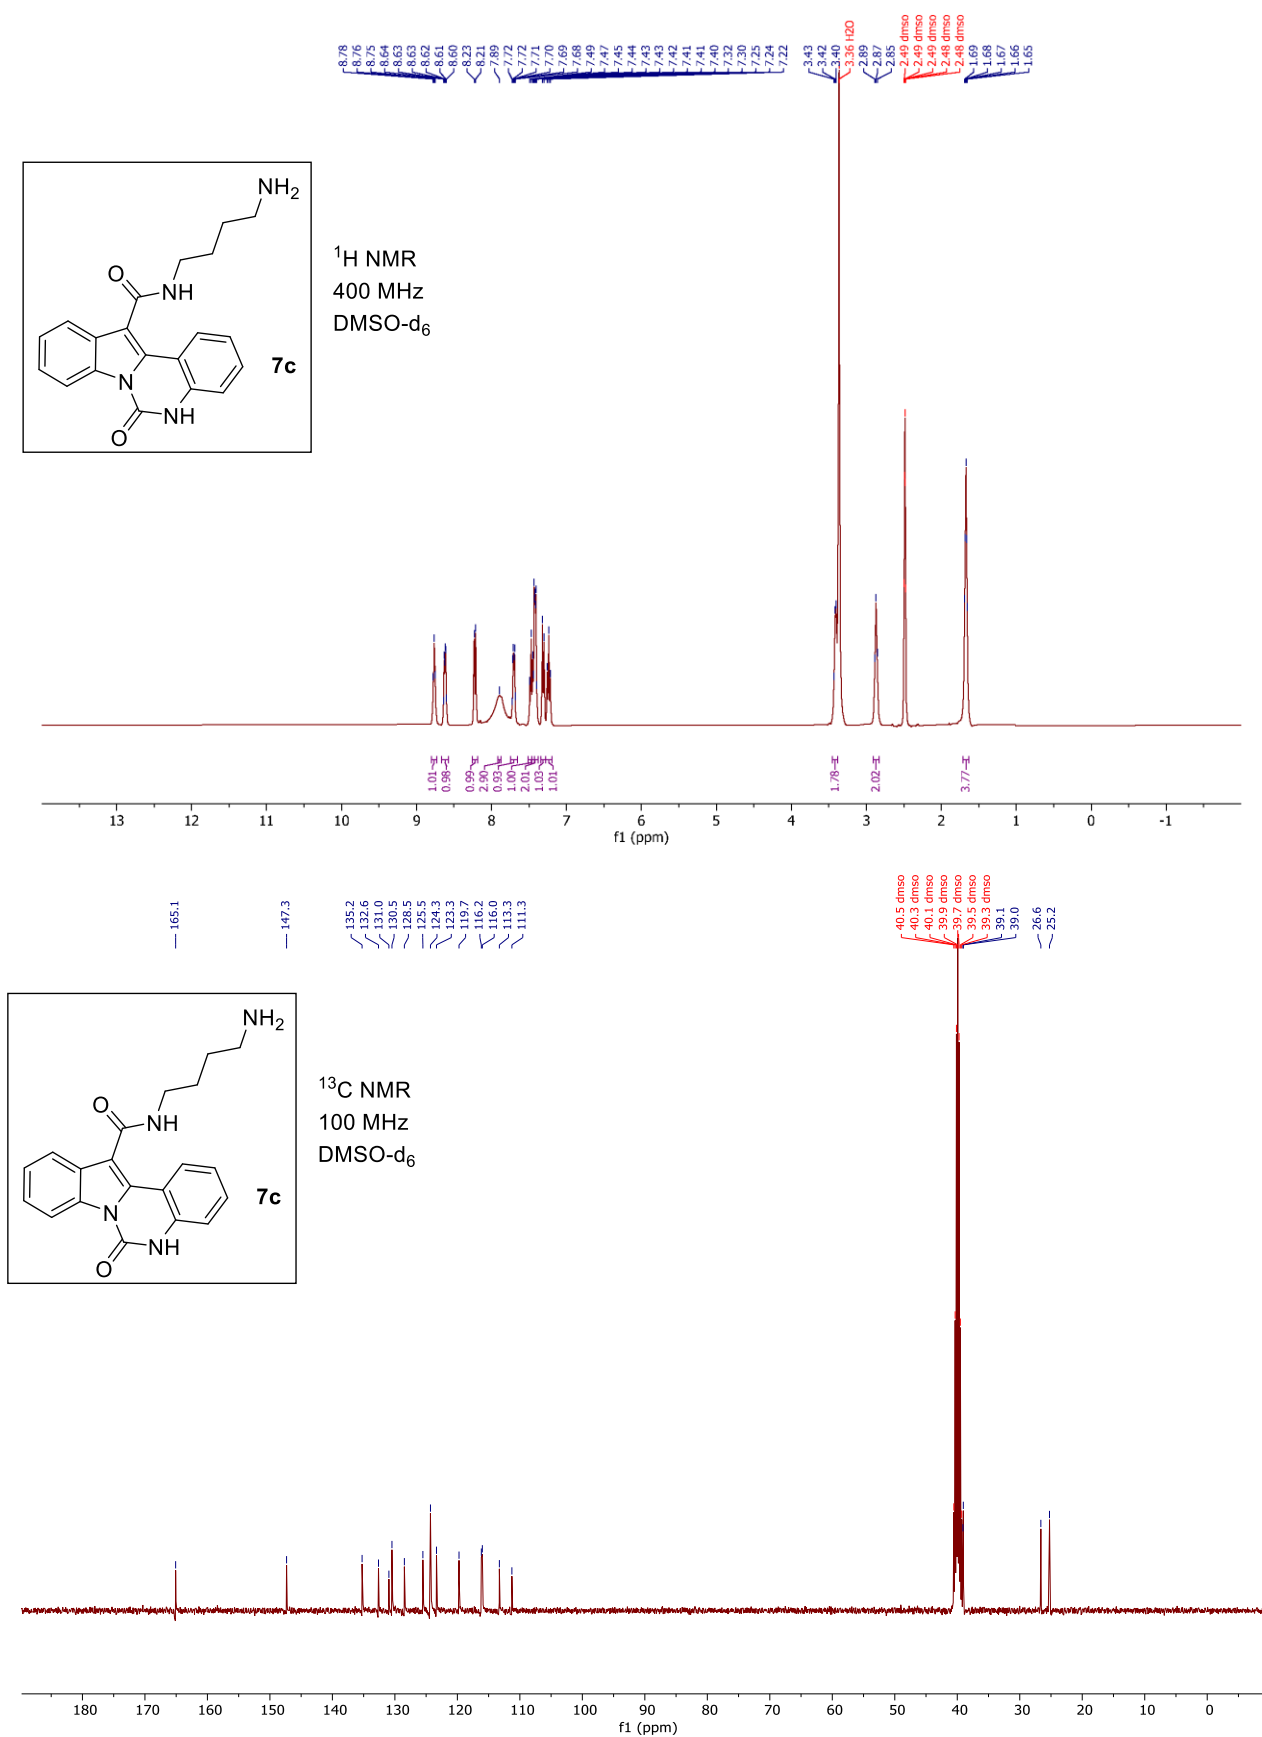

**Figure S18.** <sup>1</sup>H and <sup>13</sup>C NMR spectra of compound 7c.

## Compound Spectrum List Report

### Analysis Info

Analysis Name D:\Data\AST\KDV-28.d  
 Method tune\_norm.m  
 Sample Name Tune wide  
 Comment

Acquisition Date 6/9/2024

Operator Mitrokhov  
 Instrument / Ser# microTOF-Q II 10225

### Acquisition Parameter

|             |            |                       |           |                  |           |
|-------------|------------|-----------------------|-----------|------------------|-----------|
| Source Type | ESI        | Ion Polarity          | Positive  | Set Nebulizer    | 0.6 Bar   |
| Focus       | Not active | Set Capillary         | 4500 V    | Set Dry Heater   | 180 °C    |
| Scan Begin  | 50 m/z     | Set End Plate Offset  | -500 V    | Set Dry Gas      | 4.0 l/min |
| Scan End    | 3000 m/z   | Set Collision Cell RF | 550.0 Vpp | Set Divert Valve | Source    |

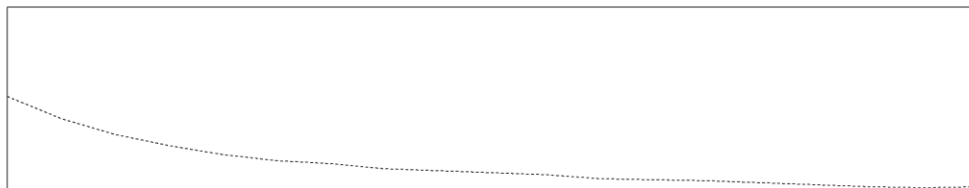

| #    | RT [min] | Area | Int. Type        | Intens. | S/N  | Chromatogram | Max. m/z |
|------|----------|------|------------------|---------|------|--------------|----------|
| n.a. | 0.2      | n.a. | Average spectrum | n.a.    | n.a. | n.a.         | 349.1673 |

### +MS, 0.1-0.3min #(3-18)

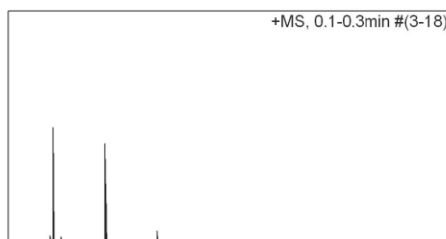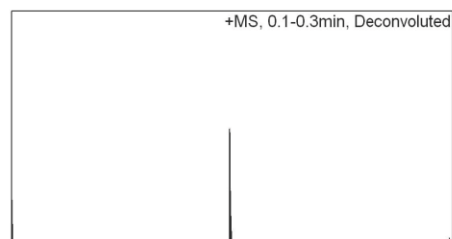

| #  | m/z       | Res. | S/N     | I       | I %   |
|----|-----------|------|---------|---------|-------|
| 1  | 332.1389  | 5280 | 1545.3  | 87619   | 6.9   |
| 2  | 349.1673  | 3159 | 21914.5 | 1274998 | 100.0 |
| 3  | 350.1705  | 4522 | 18015.1 | 1046257 | 82.1  |
| 4  | 351.1707  | 5483 | 2939.7  | 170508  | 13.4  |
| 5  | 405.2268  | 5532 | 1518.0  | 79519   | 6.2   |
| 6  | 697.3236  | 5225 | 13524.1 | 1096323 | 86.0  |
| 7  | 698.3251  | 5829 | 7962.4  | 647661  | 50.8  |
| 8  | 699.3257  | 6150 | 1995.4  | 162937  | 12.8  |
| 9  | 1045.4787 | 6654 | 1517.2  | 143555  | 11.3  |
| 10 | 1046.4810 | 6583 | 1095.3  | 103876  | 8.1   |

| # | m/z       | Res. | S/N | I       | I %   |
|---|-----------|------|-----|---------|-------|
| 1 | 350.1700  |      |     | 1046256 | 44.1  |
| 2 | 697.3238  |      |     | 2371320 | 100.0 |
| 3 | 1045.4777 |      |     | 143554  | 6.1   |

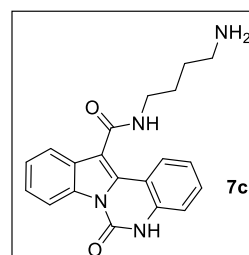

**Figure S19.** Copy of HRMS (ESI) spectra of compound **7c**.

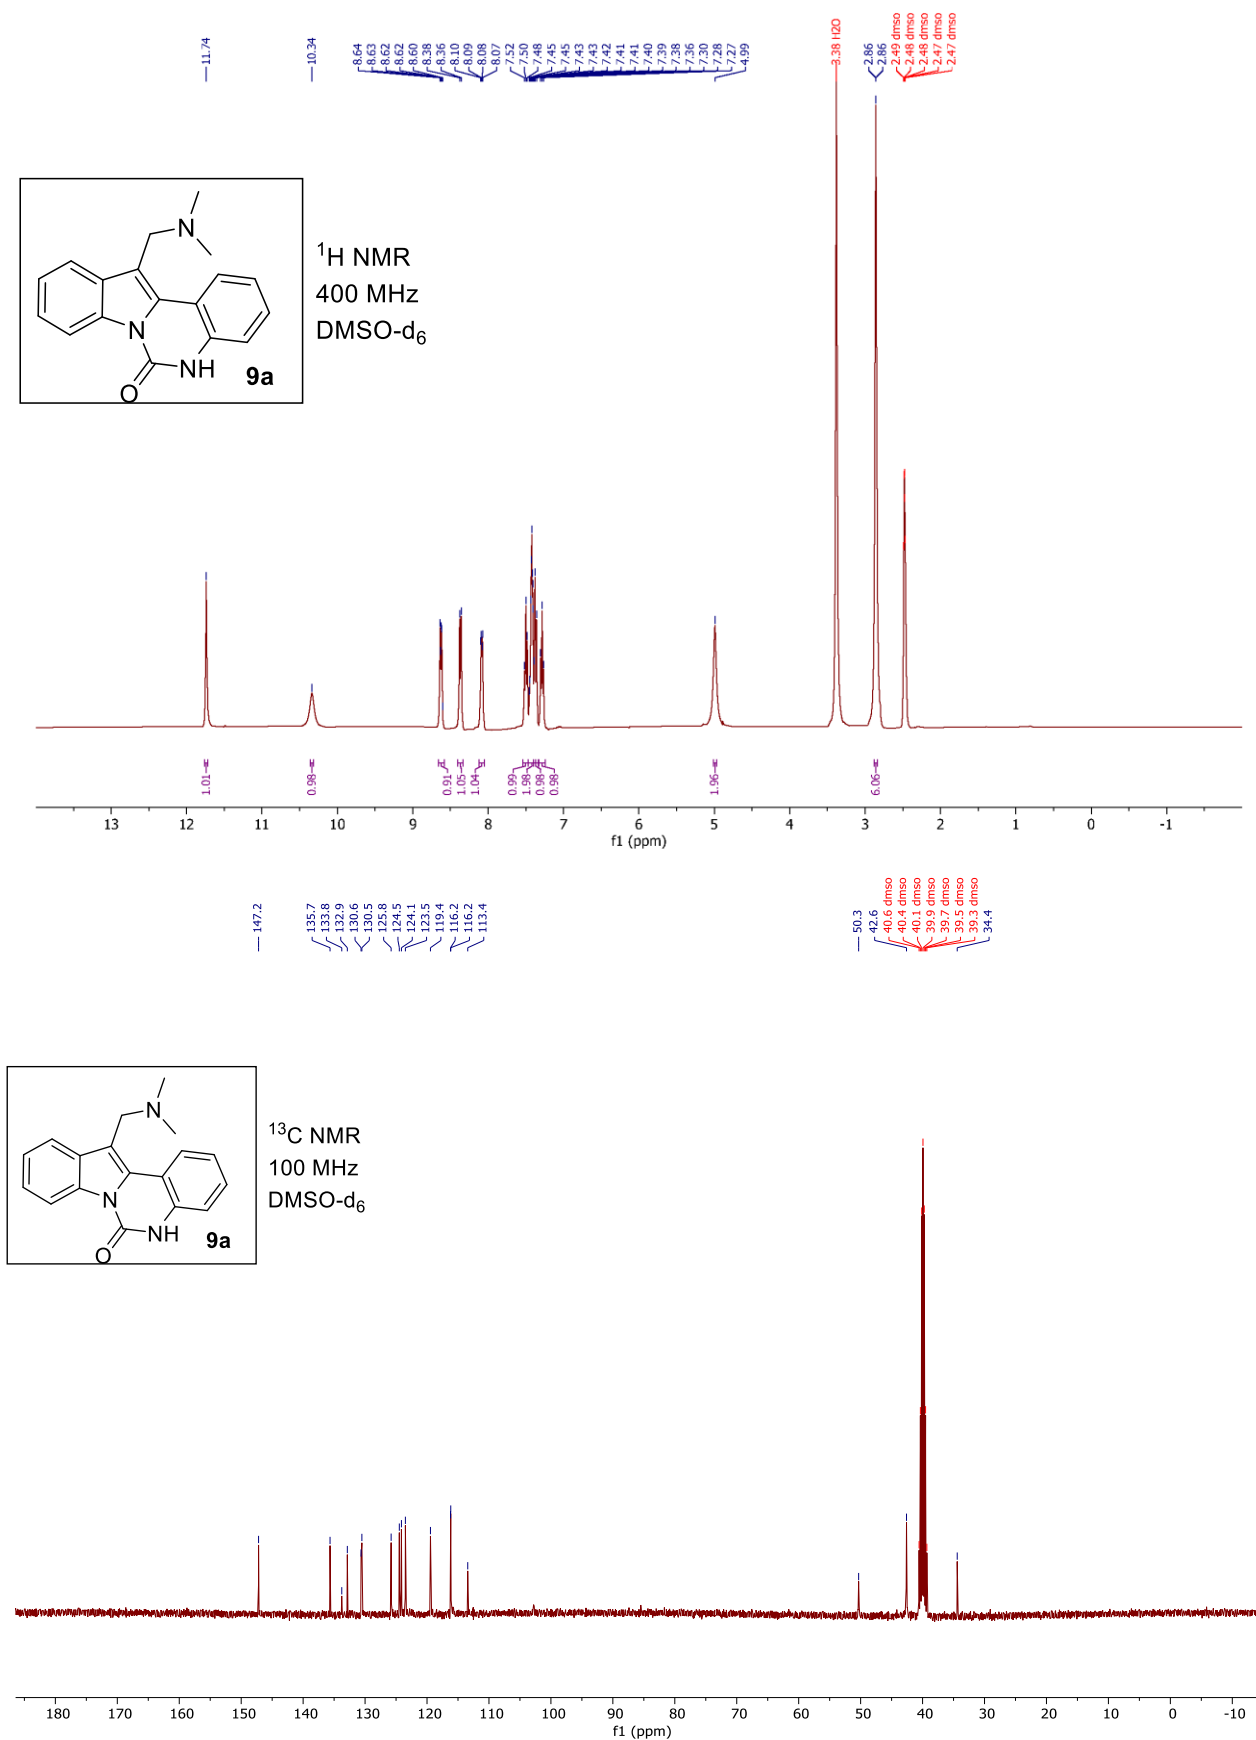

**Figure S20.** <sup>1</sup>H and <sup>13</sup>C NMR spectra of compound **9a**.

## Compound Spectrum List Report

### Analysis Info

Analysis Name D:\Data\AST\KDV-19.d  
 Method tune\_low\_norm.m  
 Sample Name Tune wide  
 Comment

Acquisition Date 6/27/2025

Operator Mitrokhov  
 Instrument / Ser# microTOF-Q II 10225

### Acquisition Parameter

|             |          |                       |           |                  |           |
|-------------|----------|-----------------------|-----------|------------------|-----------|
| Source Type | ESI      | Ion Polarity          | Positive  | Set Nebulizer    | 0.4 Bar   |
| Focus       | Active   | Set Capillary         | 4500 V    | Set Dry Heater   | 180 °C    |
| Scan Begin  | 50 m/z   | Set End Plate Offset  | -500 V    | Set Dry Gas      | 4.0 l/min |
| Scan End    | 3000 m/z | Set Collision Cell RF | 150.0 Vpp | Set Divert Valve | Source    |

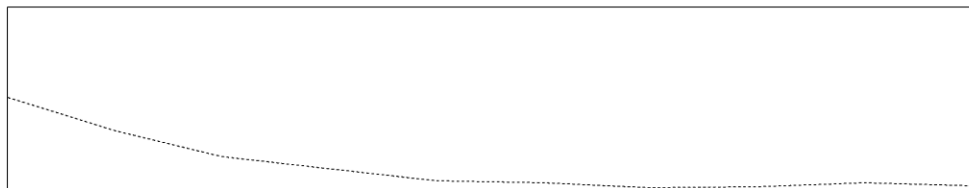

| #    | RT [min] | Area | Max. m/z |
|------|----------|------|----------|
| n.a. | 0.1      | n.a. | 247.0883 |

### +MS, 0.1-0.2min #(5-10)

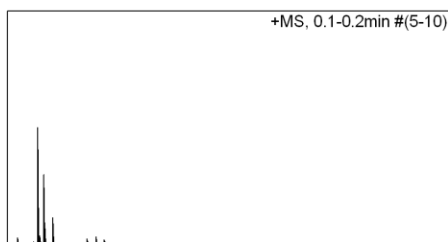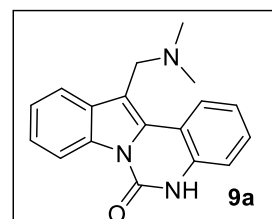

| #  | m/z      | I       | I %   |
|----|----------|---------|-------|
| 1  | 115.0900 | 137779  | 5.4   |
| 2  | 247.0883 | 2556611 | 100.0 |
| 3  | 248.0943 | 1582119 | 61.9  |
| 4  | 249.0941 | 183317  | 7.2   |
| 5  | 261.0680 | 188773  | 7.4   |
| 6  | 292.1453 | 1521845 | 59.5  |
| 7  | 293.1498 | 415190  | 16.2  |
| 8  | 349.1681 | 571824  | 22.4  |
| 9  | 350.1689 | 137309  | 5.4   |
| 10 | 640.3008 | 153898  | 6.0   |

**Figure S21.** Copy of HRMS (ESI) spectra of compound **9a**.

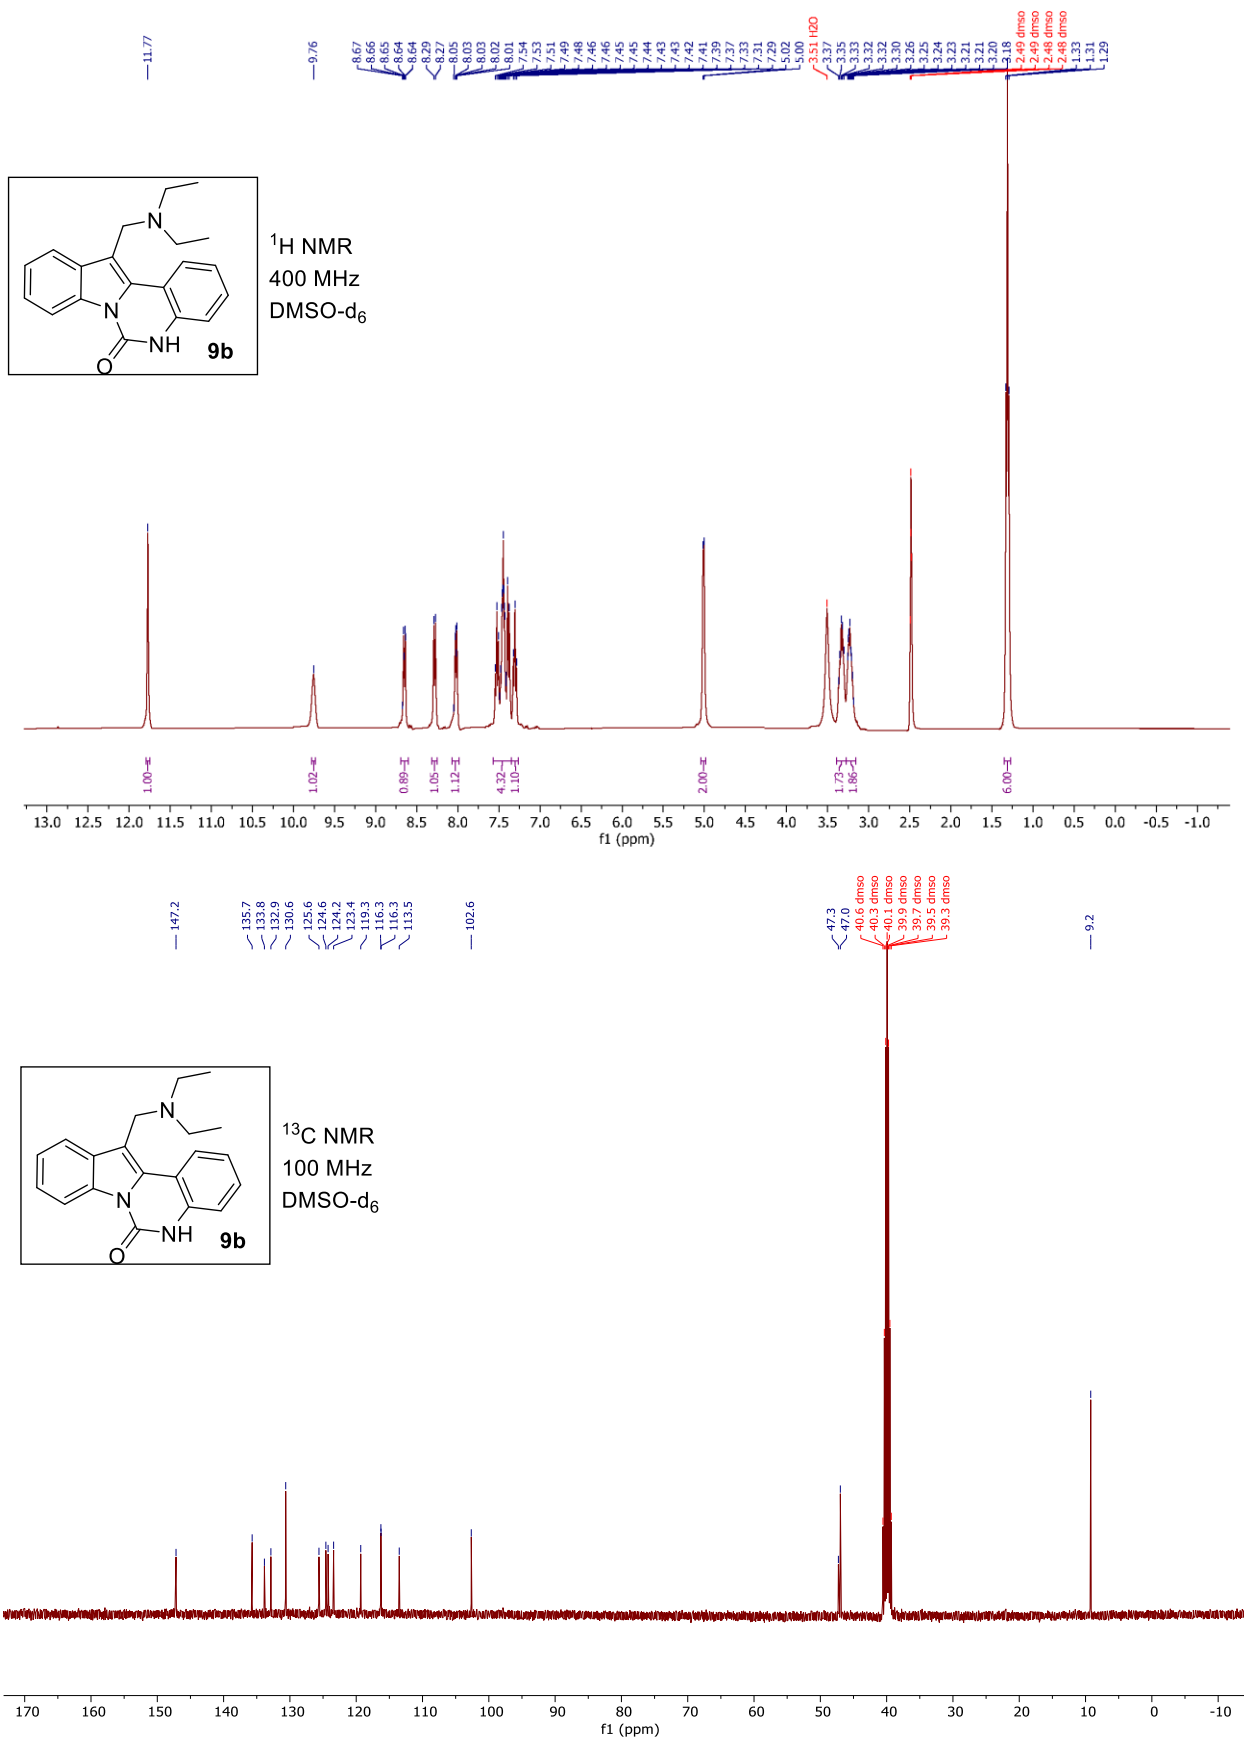

**Figure S22.** <sup>1</sup>H and <sup>13</sup>C NMR spectra of compound **9b**.

## Compound Spectrum List Report

### Analysis Info

Analysis Name D:\Data\AST\KDV-44.d  
 Method tune\_norm.m  
 Sample Name Tune wide  
 Comment

Acquisition Date 6/27/2024

Operator Mitrokhov  
 Instrument / Ser# microTOF-Q II 10225

### Acquisition Parameter

|             |            |                       |           |                  |           |
|-------------|------------|-----------------------|-----------|------------------|-----------|
| Source Type | ESI        | Ion Polarity          | Positive  | Set Nebulizer    | 0.4 Bar   |
| Focus       | Not active | Set Capillary         | 4500 V    | Set Dry Heater   | 180 °C    |
| Scan Begin  | 50 m/z     | Set End Plate Offset  | -500 V    | Set Dry Gas      | 4.0 l/min |
| Scan End    | 3000 m/z   | Set Collision Cell RF | 550.0 Vpp | Set Divert Valve | Source    |

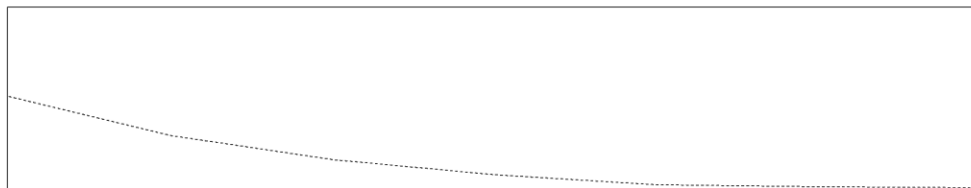

| #    | RT [min] | Area | Int. Type        | Intens. | S/N  | Chromatogram | Max. m/z |
|------|----------|------|------------------|---------|------|--------------|----------|
| n.a. | 0.1      | n.a. | Average spectrum | n.a.    | n.a. | n.a.         | 320.1773 |

### +MS, 0.0-0.1min #(2-6)

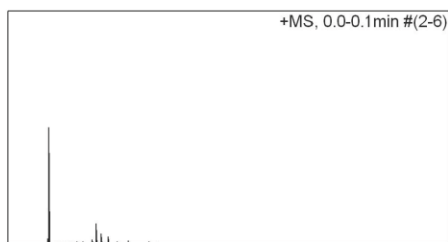

### +MS, 0.0-0.1min, Deconvoluted

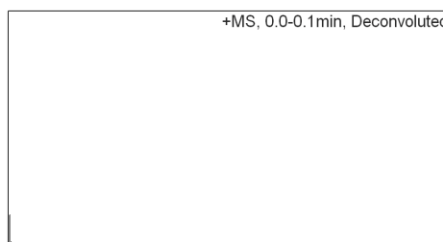

| #  | m/z      | Res. | S/N     | I      | I %   |
|----|----------|------|---------|--------|-------|
| 1  | 318.1796 | 6044 | 841.3   | 47019  | 4.7   |
| 2  | 320.1773 | 5214 | 17569.6 | 989922 | 100.0 |
| 3  | 321.1996 | 5989 | 4628.9  | 261982 | 26.5  |
| 4  | 639.3817 | 6893 | 1521.8  | 171463 | 17.3  |
| 5  | 640.3845 | 7090 | 681.9   | 77084  | 7.8   |
| 6  | 675.3617 | 7048 | 697.9   | 85281  | 8.6   |
| 7  | 676.3639 | 7081 | 324.2   | 39773  | 4.0   |
| 8  | 677.3601 | 7233 | 299.6   | 36848  | 3.7   |
| 9  | 719.3121 | 7250 | 397.5   | 53214  | 5.4   |
| 10 | 721.3117 | 7249 | 422.2   | 56727  | 5.7   |

| # | m/z      | Res. | S/N | I      | I %   |
|---|----------|------|-----|--------|-------|
| 1 | 320.1970 |      |     | 989922 | 100.0 |
| 2 | 639.3815 |      |     | 171463 | 17.3  |

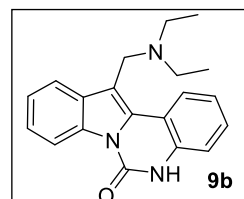

**Figure S23.** Copy of HRMS (ESI) spectra of compound **9b**.

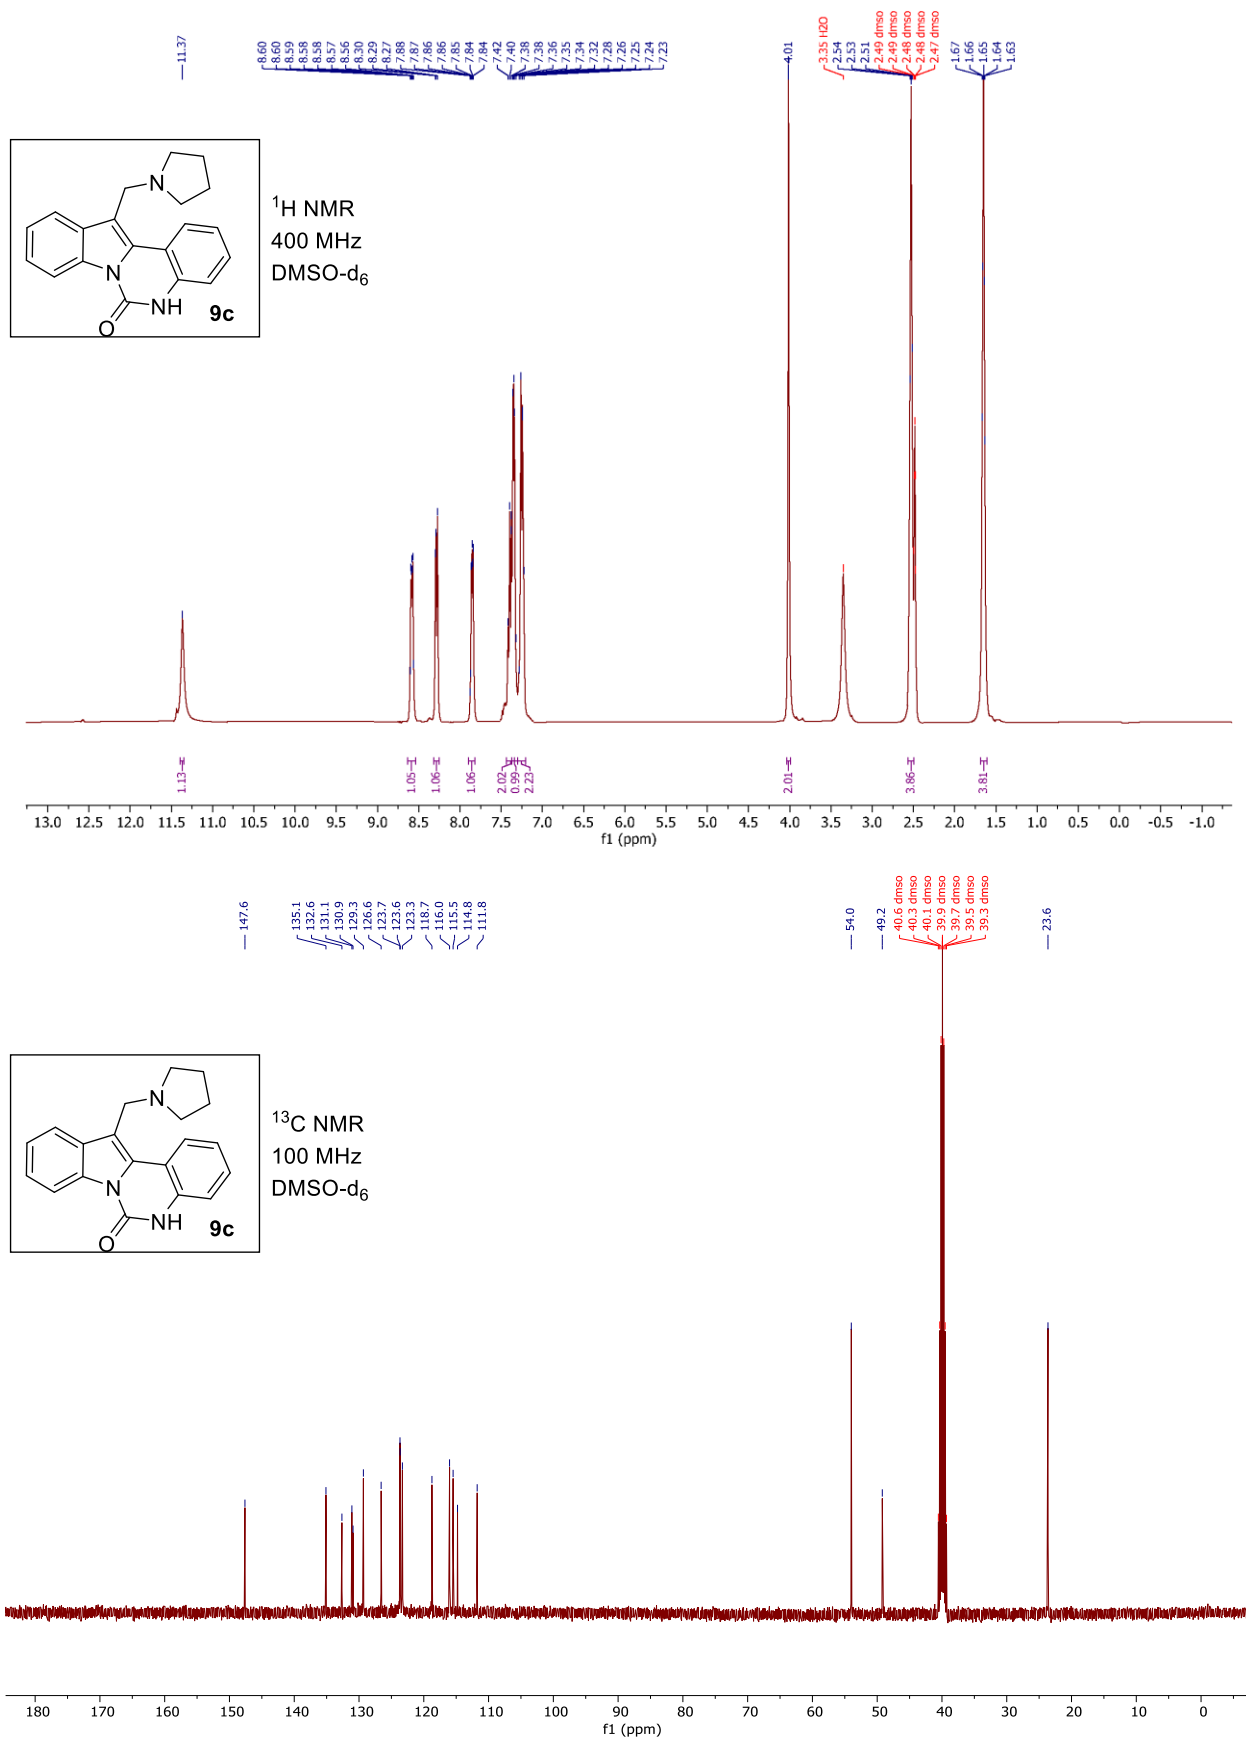

**Figure S24.** <sup>1</sup>H and <sup>13</sup>C NMR spectra of compound **9c**.

## Compound Spectrum List Report

### Analysis Info

Analysis Name D:\Data\AST\KDV-46.d  
 Method tune\_norm.m  
 Sample Name Tune wide  
 Comment

Acquisition Date 6/29/2025

Operator Mitrokhov  
 Instrument / Ser# microTOF-Q II 10225

### Acquisition Parameter

|             |            |                       |           |                  |           |
|-------------|------------|-----------------------|-----------|------------------|-----------|
| Source Type | ESI        | Ion Polarity          | Positive  | Set Nebulizer    | 0.4 Bar   |
| Focus       | Not active | Set Capillary         | 4500 V    | Set Dry Heater   | 180 °C    |
| Scan Begin  | 50 m/z     | Set End Plate Offset  | -500 V    | Set Dry Gas      | 4.0 l/min |
| Scan End    | 3000 m/z   | Set Collision Cell RF | 550.0 Vpp | Set Divert Valve | Source    |

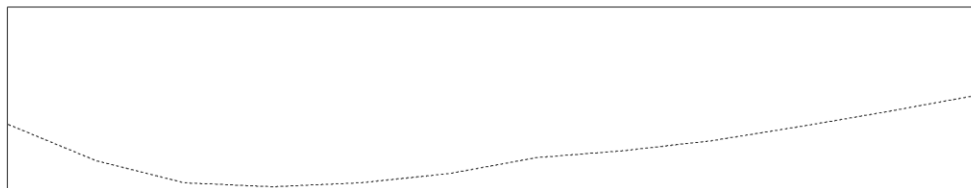

| #    | RT [min] | Area | Int. Type        | Intens. | S/N  | Chromatogram | Max. m/z |
|------|----------|------|------------------|---------|------|--------------|----------|
| n.a. | 0.1      | n.a. | Average spectrum | n.a.    | n.a. | n.a.         | 318.1613 |

### +MS, 0.0-0.1min #(2-6)

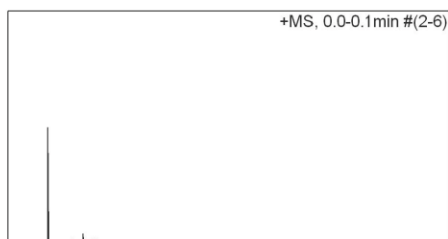

| #  | m/z      | Res. | S/N    | I      | I %   |
|----|----------|------|--------|--------|-------|
| 1  | 316.1466 | 6032 | 705.0  | 70728  | 7.9   |
| 2  | 318.1613 | 5308 | 8870.8 | 897815 | 100.0 |
| 3  | 319.1660 | 5841 | 2266.7 | 230529 | 25.7  |
| 4  | 320.1676 | 5988 | 273.9  | 28028  | 3.1   |
| 5  | 383.2056 | 6230 | 222.7  | 26494  | 3.0   |
| 6  | 487.2371 | 6685 | 217.7  | 29474  | 3.3   |
| 7  | 552.2454 | 6624 | 541.9  | 76290  | 8.5   |
| 8  | 553.2467 | 6863 | 216.0  | 30452  | 3.4   |
| 9  | 625.2972 | 6726 | 246.2  | 31841  | 3.5   |
| 10 | 635.3166 | 6834 | 219.1  | 28003  | 3.1   |

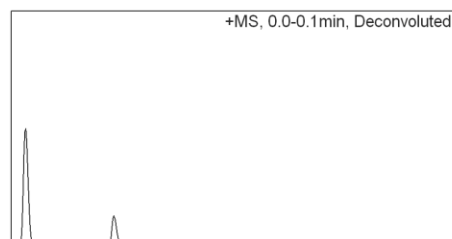

| # | m/z      | Res. | S/N | I      | I %   |
|---|----------|------|-----|--------|-------|
| 1 | 318.1635 |      |     | 897815 | 100.0 |

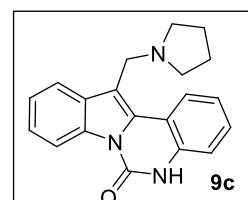

**Figure S25.** Copy of HRMS (ESI) spectra of compound **9c**.



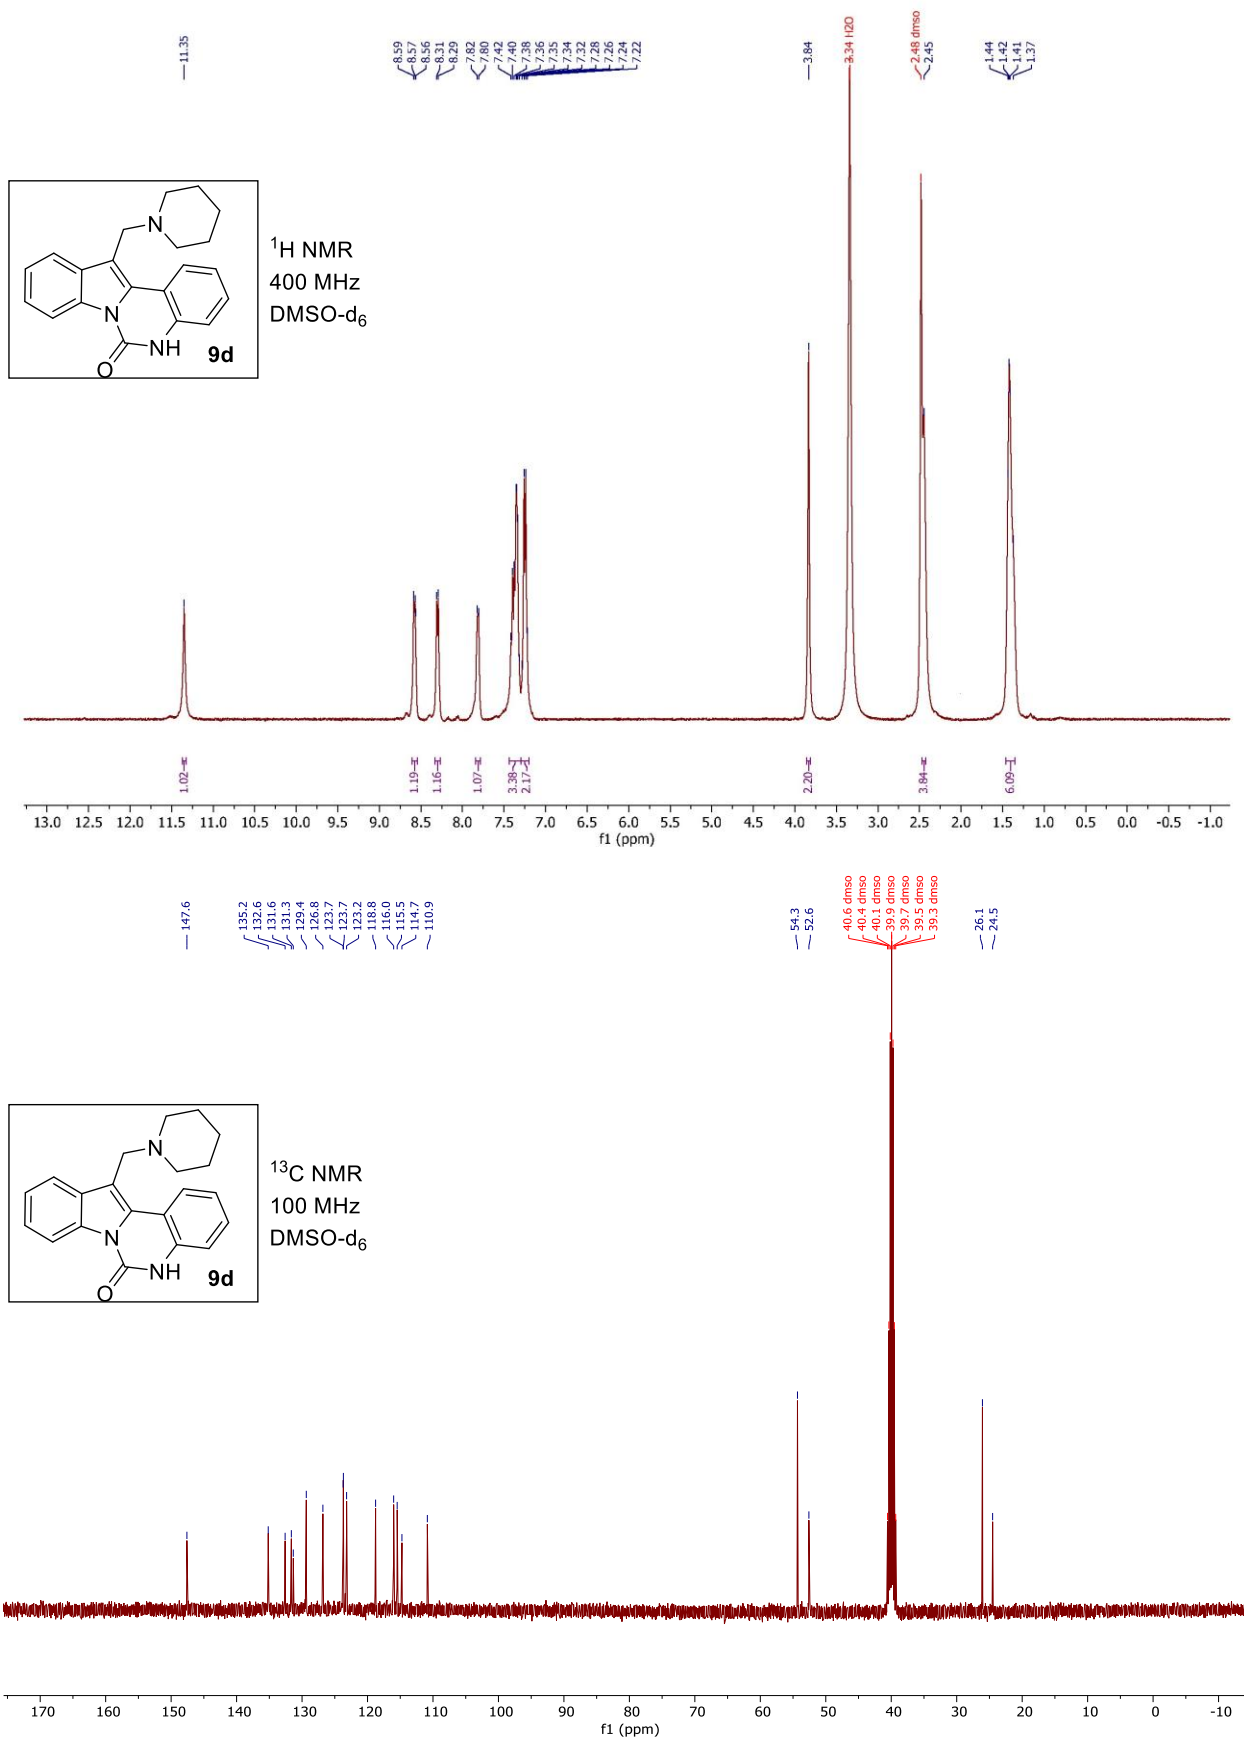

**Figure S26.** <sup>1</sup>H and <sup>13</sup>C NMR spectra of compound **9d**.

## Compound Spectrum List Report

### Analysis Info

Analysis Name D:\Data\AST\KDV-25.d  
 Method tune\_norm.m  
 Sample Name Tune wide  
 Comment

Acquisition Date 10/27/2023  
 Operator Mitrokhov  
 Instrument / Ser# microTOF-Q II 10225

### Acquisition Parameter

|             |          |                       |           |                  |           |
|-------------|----------|-----------------------|-----------|------------------|-----------|
| Source Type | ESI      | Ion Polarity          | Positive  | Set Nebulizer    | 0.4 Bar   |
| Focus       | Active   | Set Capillary         | 4500 V    | Set Dry Heater   | 180 °C    |
| Scan Begin  | 50 m/z   | Set End Plate Offset  | -500 V    | Set Dry Gas      | 4.0 l/min |
| Scan End    | 3000 m/z | Set Collision Cell RF | 550.0 Vpp | Set Divert Valve | Source    |

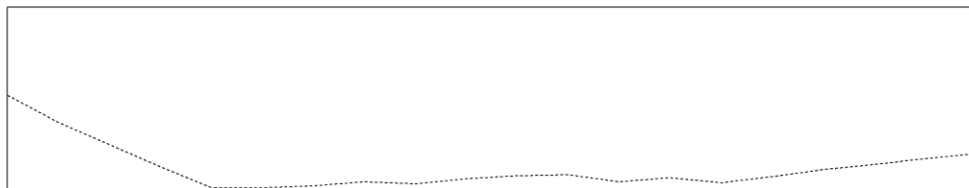

| #    | RT [min] | Area | Int. Type        | Intens. | S/N  | Chromatogram | Max. m/z |
|------|----------|------|------------------|---------|------|--------------|----------|
| n.a. | 0.2      | n.a. | Average spectrum | n.a.    | n.a. | n.a.         | 332.1743 |

### +MS, 0.1-0.3min #(4-16)

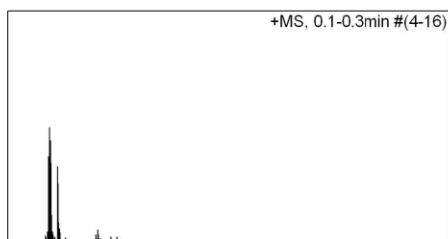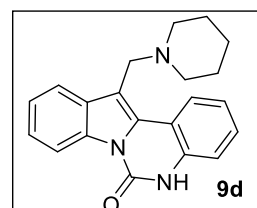

| #  | m/z      | Res.  | S/N    | I      | I %   |
|----|----------|-------|--------|--------|-------|
| 1  | 321.1323 | 10768 | 1763.0 | 157431 | 75.2  |
| 2  | 322.1341 | 8857  | 331.2  | 29748  | 14.2  |
| 3  | 330.1572 | 9794  | 658.7  | 61624  | 29.4  |
| 4  | 332.1743 | 11492 | 2215.3 | 209297 | 100.0 |
| 5  | 333.1760 | 9009  | 486.1  | 46172  | 22.1  |
| 6  | 335.1488 | 11280 | 1937.4 | 185755 | 88.8  |
| 7  | 336.1502 | 8792  | 390.8  | 37672  | 18.0  |
| 8  | 383.1999 | 11592 | 1284.2 | 139226 | 66.5  |
| 9  | 384.2019 | 9950  | 262.1  | 28512  | 13.6  |
| 10 | 399.1708 | 10294 | 247.9  | 27839  | 13.3  |

**Figure S27.** Copy of HRMS (ESI) spectra of compound **9d**.

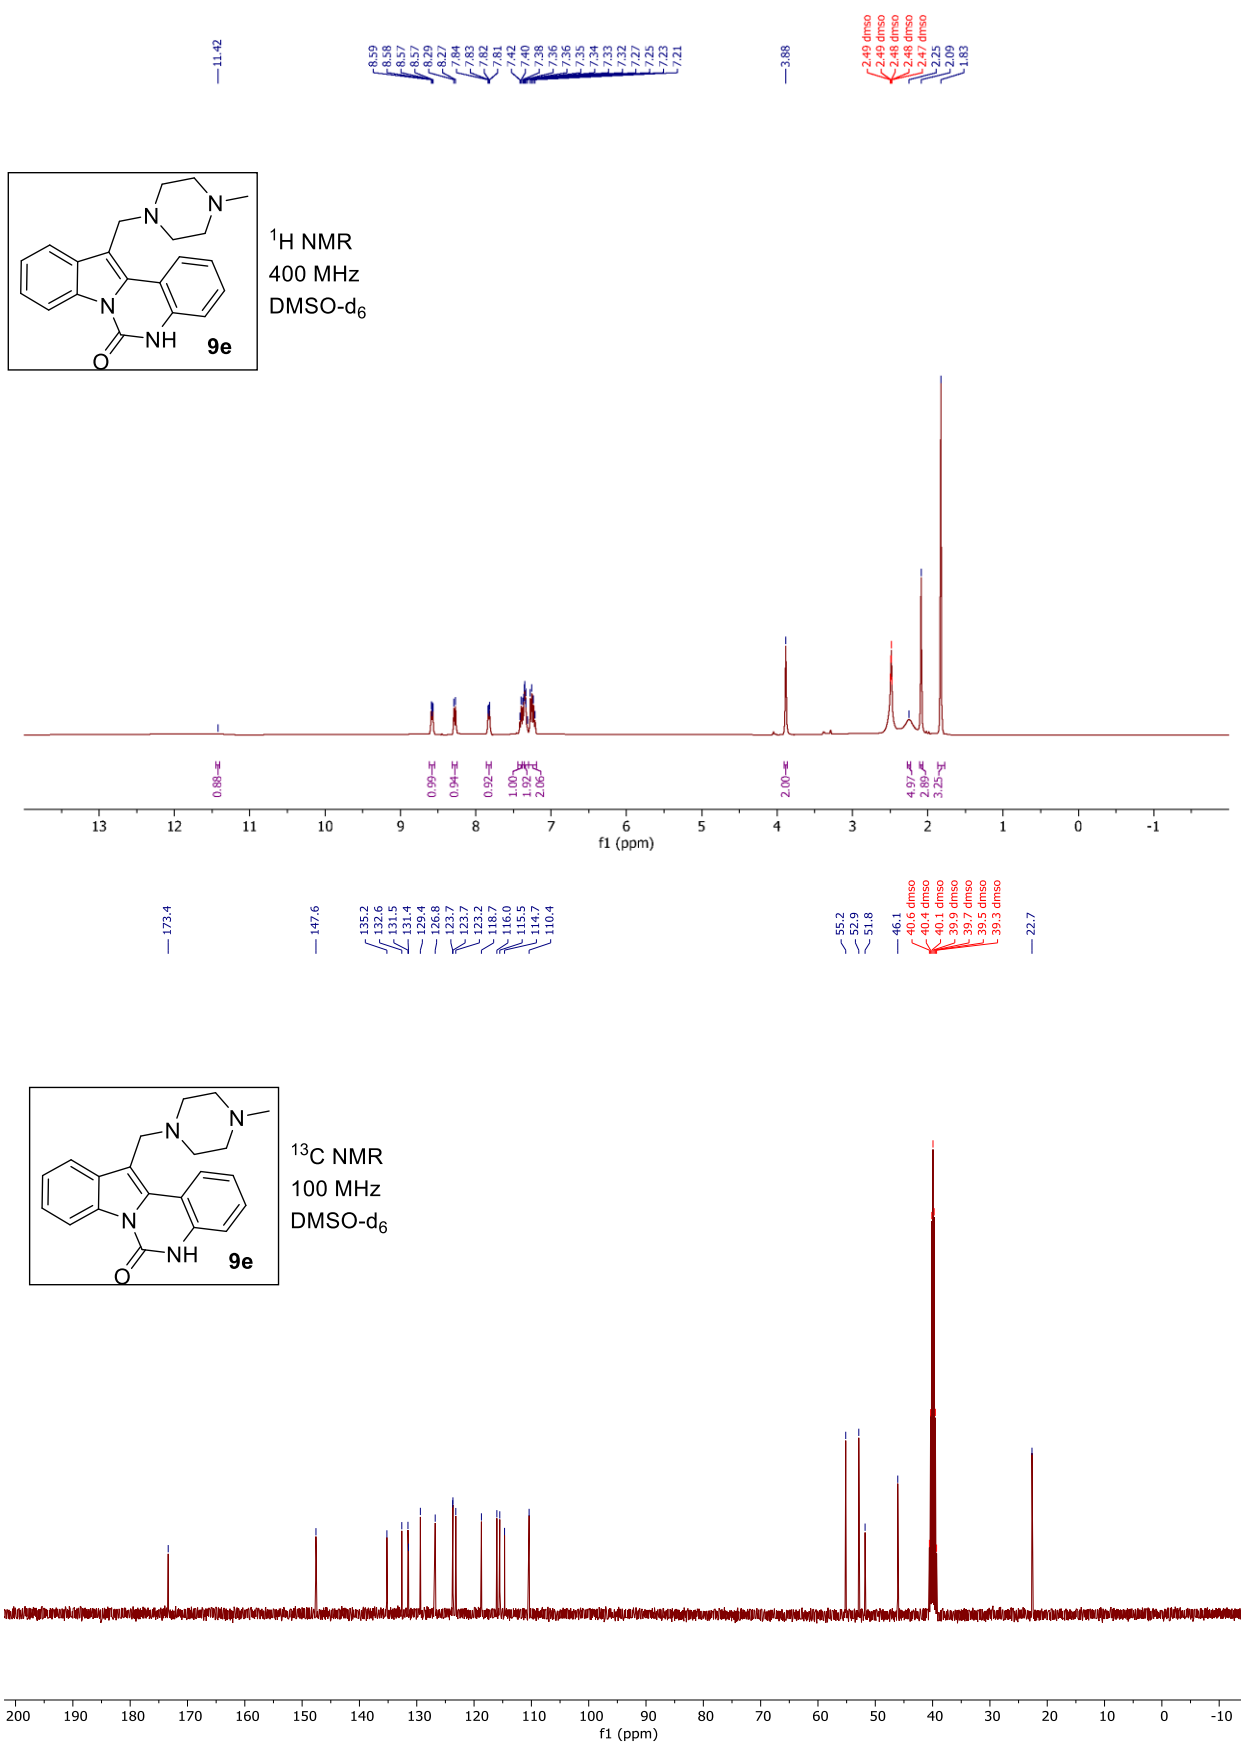

**Figure S28.** <sup>1</sup>H and <sup>13</sup>C NMR spectra of compound **9e**.

## Compound Spectrum List Report

### Analysis Info

Analysis Name D:\Data\AST\KDV-23.d  
 Method tune\_norm.m  
 Sample Name Tune wide  
 Comment

Acquisition Date 6/27/2025

Operator Mitrokhov  
 Instrument / Ser# microTOF-Q II 10225

### Acquisition Parameter

|             |          |                       |           |                  |           |
|-------------|----------|-----------------------|-----------|------------------|-----------|
| Source Type | ESI      | Ion Polarity          | Positive  | Set Nebulizer    | 0.4 Bar   |
| Focus       | Active   | Set Capillary         | 4500 V    | Set Dry Heater   | 180 °C    |
| Scan Begin  | 50 m/z   | Set End Plate Offset  | -500 V    | Set Dry Gas      | 4.0 l/min |
| Scan End    | 3000 m/z | Set Collision Cell RF | 550.0 Vpp | Set Divert Valve | Source    |

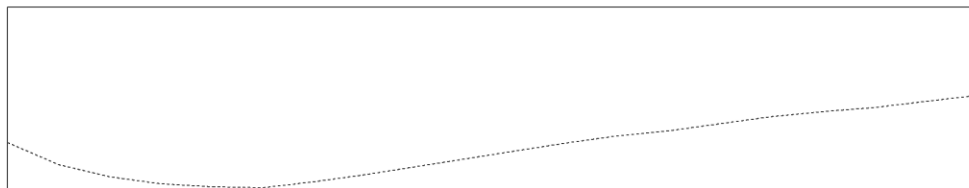

| #    | RT [min] | Area | Int. Type        | Intens. | S/N  | Chromatogram | Max. m/z |
|------|----------|------|------------------|---------|------|--------------|----------|
| n.a. | 0.2      | n.a. | Average spectrum | n.a.    | n.a. | n.a.         | 347.1881 |

### +MS, 0.1-0.3min #(4-15)

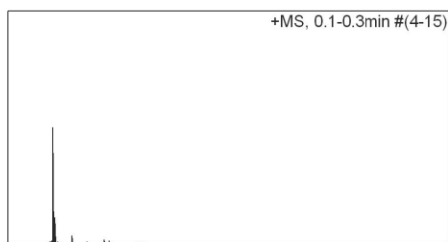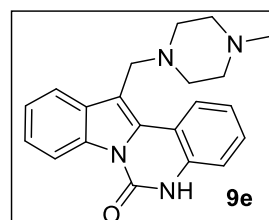

| #  | m/z      | Res.  | S/N     | I       | I %   |
|----|----------|-------|---------|---------|-------|
| 1  | 345.1687 | 10008 | 344.6   | 31916   | 2.4   |
| 2  | 347.1881 | 20336 | 14347.8 | 1328074 | 100.0 |
| 3  | 348.1889 | 12061 | 2464.3  | 228143  | 17.2  |
| 4  | 349.1892 | 8798  | 295.0   | 27338   | 2.1   |
| 5  | 363.1811 | 12595 | 3196.6  | 296385  | 22.3  |
| 6  | 364.1816 | 10243 | 749.7   | 69537   | 5.2   |
| 7  | 479.1453 | 10805 | 1024.0  | 96083   | 7.2   |
| 8  | 480.1474 | 9388  | 350.5   | 32925   | 2.5   |
| 9  | 693.3539 | 11944 | 398.2   | 50607   | 3.8   |
| 10 | 729.3343 | 9913  | 247.7   | 33393   | 2.5   |

**Figure S29.** Copy of HRMS (ESI) spectra of compound **9e**.

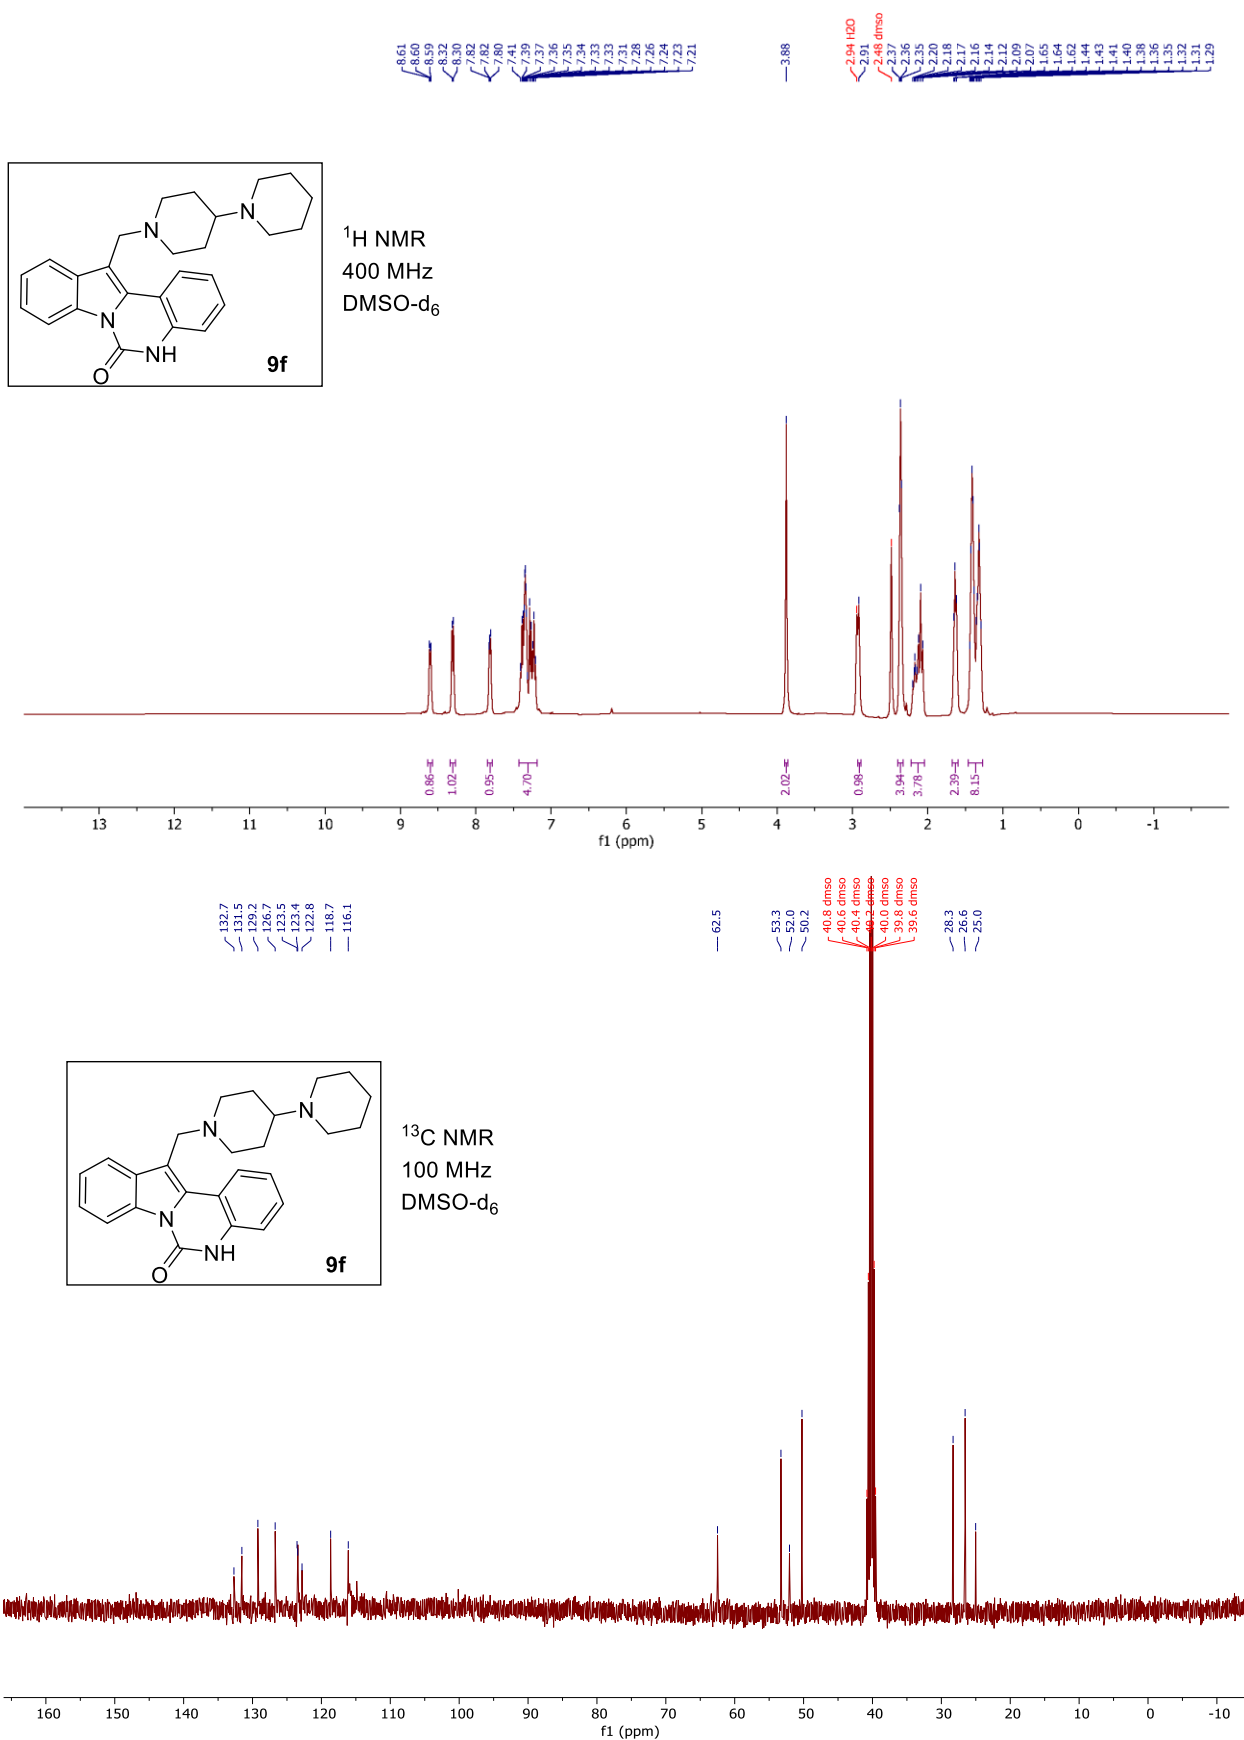

**Figure S30.** <sup>1</sup>H and <sup>13</sup>C NMR spectra of compound **9f**.

## Compound Spectrum List Report

### Analysis Info

Analysis Name D:\Data\AST\KDV-43.d  
 Method tune\_norm.m  
 Sample Name Tune wide  
 Comment

Acquisition Date 6/27/2025

Operator Mitrokhov  
 Instrument / Ser# microTOF-Q II 10225

### Acquisition Parameter

|             |            |                       |           |                  |           |
|-------------|------------|-----------------------|-----------|------------------|-----------|
| Source Type | ESI        | Ion Polarity          | Positive  | Set Nebulizer    | 0.4 Bar   |
| Focus       | Not active | Set Capillary         | 4500 V    | Set Dry Heater   | 180 °C    |
| Scan Begin  | 50 m/z     | Set End Plate Offset  | -500 V    | Set Dry Gas      | 4.0 l/min |
| Scan End    | 3000 m/z   | Set Collision Cell RF | 550.0 Vpp | Set Divert Valve | Source    |

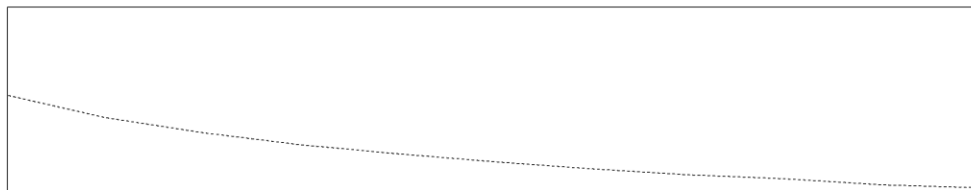

| #    | RT [min] | Area | Int. Type        | Intens. | S/N  | Chromatogram | Max. m/z |
|------|----------|------|------------------|---------|------|--------------|----------|
| n.a. | 0.1      | n.a. | Average spectrum | n.a.    | n.a. | n.a.         | 415.2498 |

### +MS, 0.0-0.1min #(2-6)

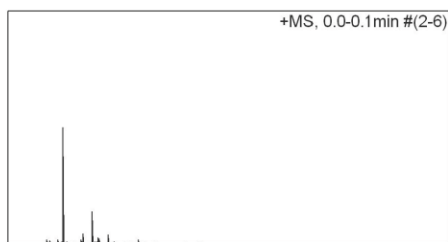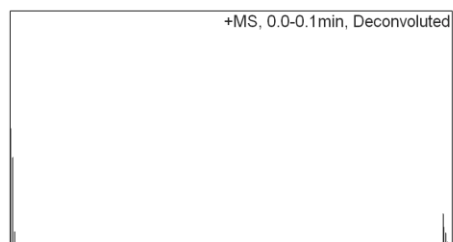

| #  | m/z      | Res. | S/N     | I       | I %   |
|----|----------|------|---------|---------|-------|
| 1  | 415.2498 | 4350 | 11097.2 | 1274871 | 100.0 |
| 2  | 416.2595 | 5750 | 8475.9  | 973879  | 76.4  |
| 3  | 417.2611 | 6506 | 1264.0  | 145333  | 11.4  |
| 4  | 554.2263 | 6585 | 950.4   | 111419  | 8.7   |
| 5  | 615.2815 | 6542 | 2957.6  | 351538  | 27.6  |
| 6  | 616.2833 | 6647 | 1182.6  | 140675  | 11.0  |
| 7  | 657.2928 | 7077 | 540.6   | 64999   | 5.1   |
| 8  | 661.3388 | 7199 | 430.0   | 51777   | 4.1   |
| 9  | 722.3950 | 6978 | 787.5   | 96072   | 7.5   |
| 10 | 922.4232 | 6858 | 329.5   | 50065   | 3.9   |

| # | m/z      | Res. | S/N | I       | I %   |
|---|----------|------|-----|---------|-------|
| 1 | 415.2558 |      |     | 1274870 | 100.0 |
| 2 | 615.2809 |      |     | 351537  | 27.6  |

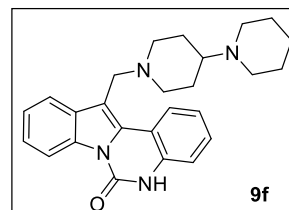

**Figure S31.** Copy of HRMS (ESI) spectra of compound **9f**.

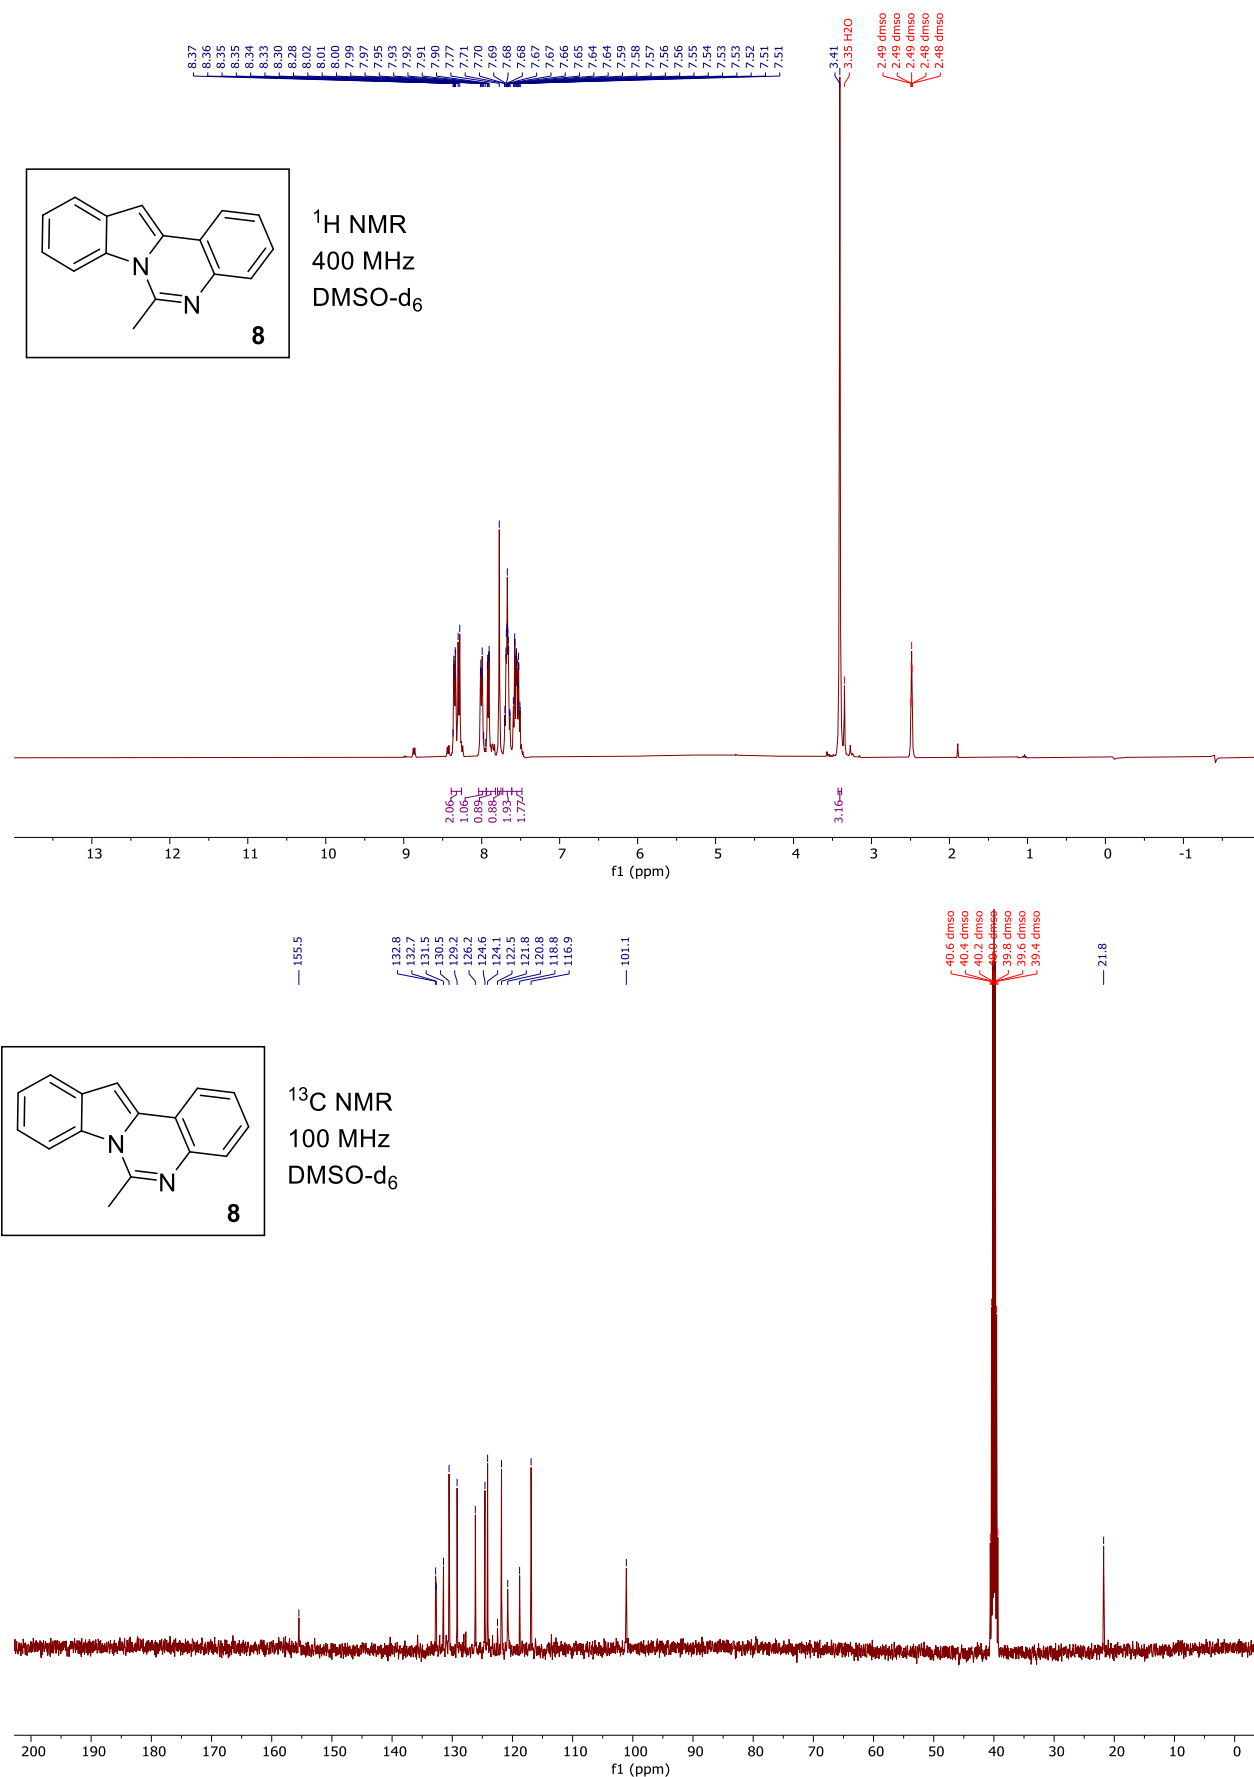

**Figure S32.** <sup>1</sup>H and <sup>13</sup>C NMR spectra of compound **9**.

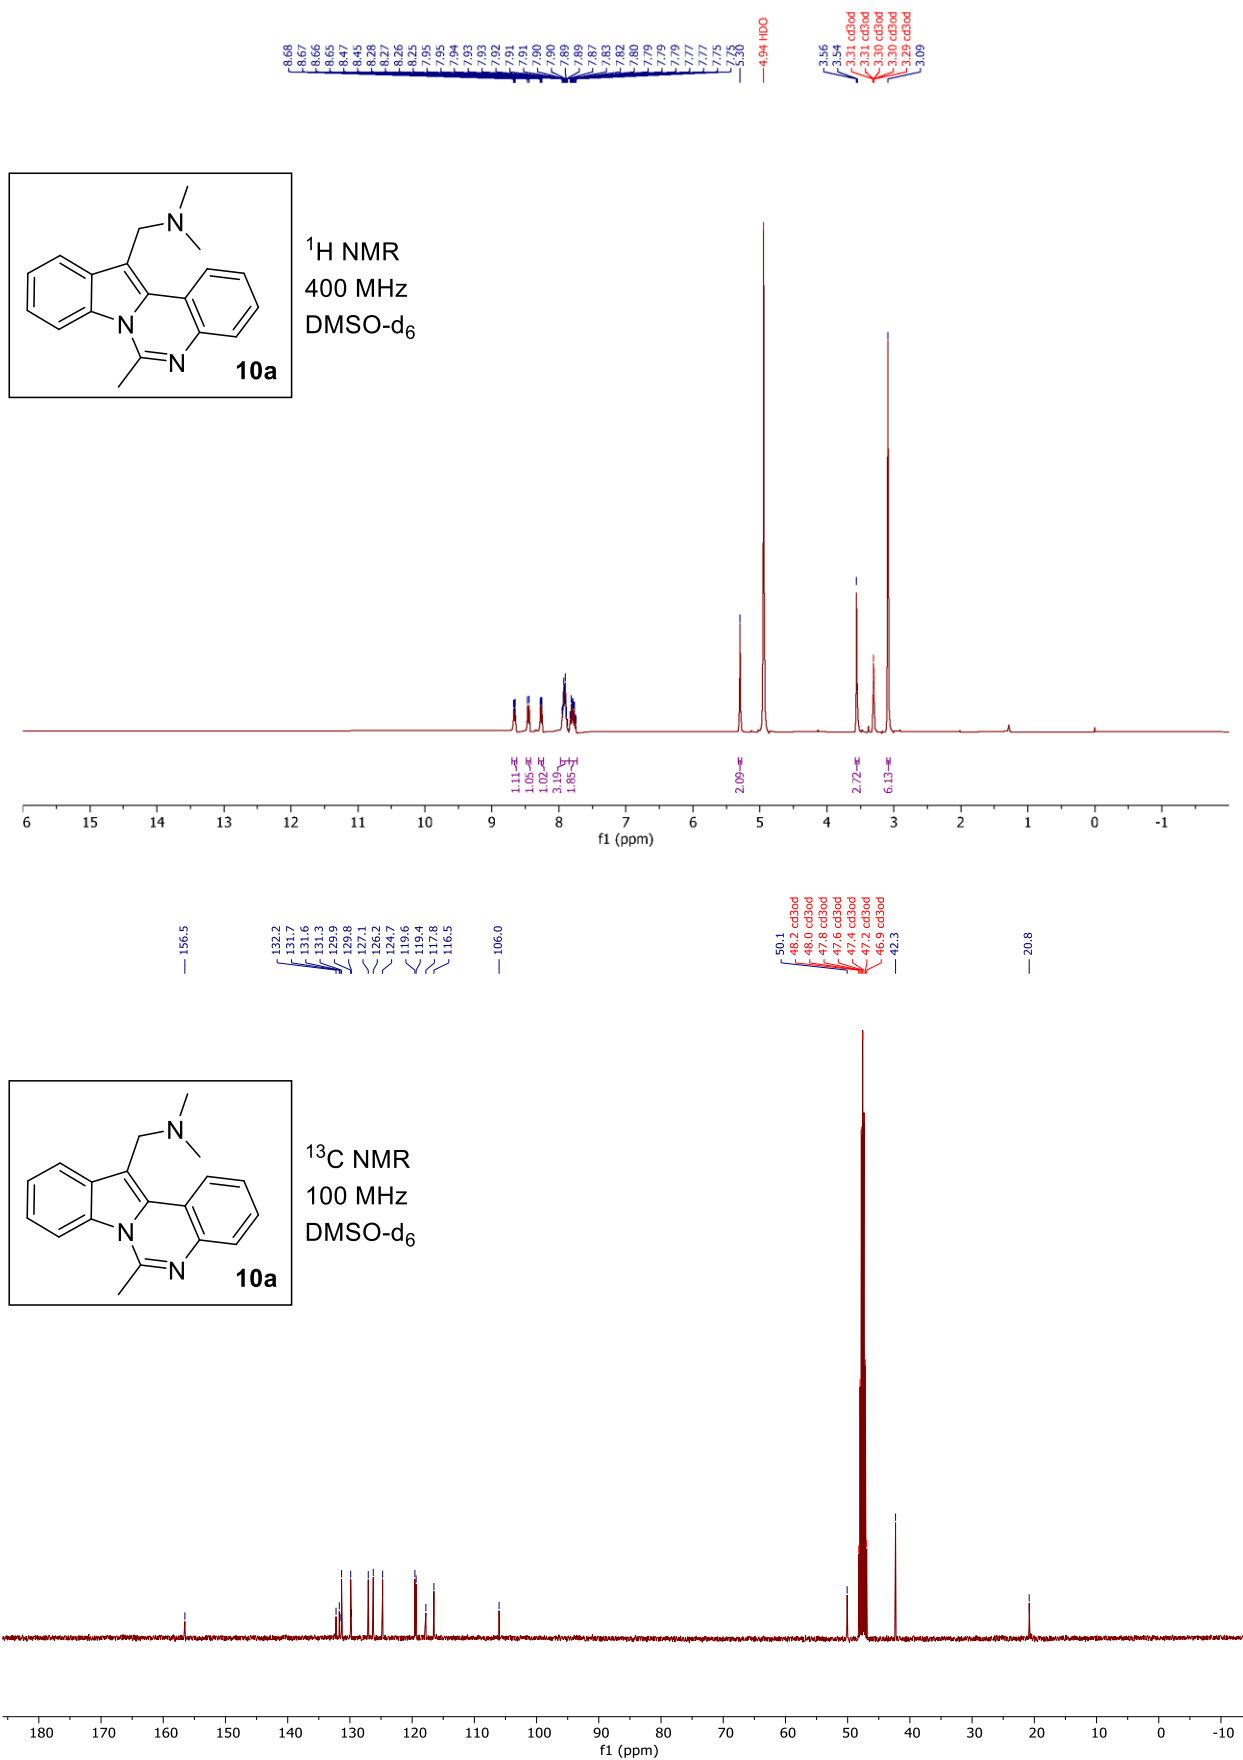

**Figure S33.** <sup>1</sup>H and <sup>13</sup>C NMR spectra of compound **10a**.



## Compound Spectrum List Report

### Analysis Info

Analysis Name D:\Data\AST\KDV-39(1).d  
 Method tune\_norm.m  
 Sample Name Tune wide  
 Comment

Acquisition Date 6/26/2025

Operator Mitrokhov  
 Instrument / Ser# microTOF-Q II 10225

### Acquisition Parameter

|             |            |                       |           |                  |           |
|-------------|------------|-----------------------|-----------|------------------|-----------|
| Source Type | ESI        | Ion Polarity          | Positive  | Set Nebulizer    | 0.4 Bar   |
| Focus       | Not active | Set Capillary         | 4500 V    | Set Dry Heater   | 180 °C    |
| Scan Begin  | 50 m/z     | Set End Plate Offset  | -500 V    | Set Dry Gas      | 4.0 l/min |
| Scan End    | 3000 m/z   | Set Collision Cell RF | 550.0 Vpp | Set Divert Valve | Source    |

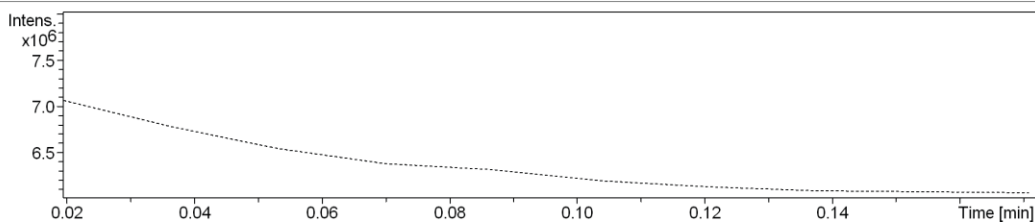

| #    | RT [min] | Area | Int. Type        | Intens. | S/N  | Chromatogram | Max. m/z |
|------|----------|------|------------------|---------|------|--------------|----------|
| n.a. | 0.1      | n.a. | Average spectrum | n.a.    | n.a. | n.a.         | 290.1664 |

### +MS, 0.0-0.1min #(2-8)

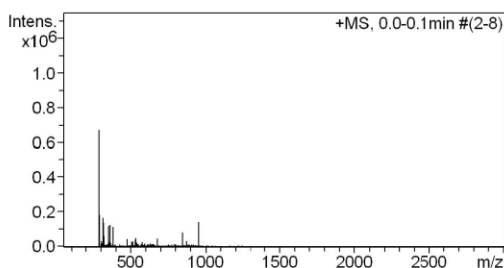

| #  | m/z      | Res. | S/N      | I      | I %   |
|----|----------|------|----------|--------|-------|
| 1  | 288.1511 | 5309 | 60582.2  | 95201  | 14.2  |
| 2  | 290.1664 | 4711 | 425221.7 | 668206 | 100.0 |
| 3  | 291.1698 | 5231 | 113017.9 | 177600 | 26.6  |
| 4  | 317.1302 | 5261 | 103009.9 | 161873 | 24.2  |
| 5  | 320.1204 | 5216 | 84832.2  | 133308 | 20.0  |
| 6  | 353.2677 | 5462 | 73575.5  | 115619 | 17.3  |
| 7  | 362.1875 | 5499 | 77166.1  | 121261 | 18.1  |
| 8  | 381.2988 | 5442 | 69969.1  | 109951 | 16.5  |
| 9  | 952.6167 | 6326 | 89358.1  | 140420 | 21.0  |
| 10 | 953.6190 | 6412 | 61787.9  | 97095  | 14.5  |

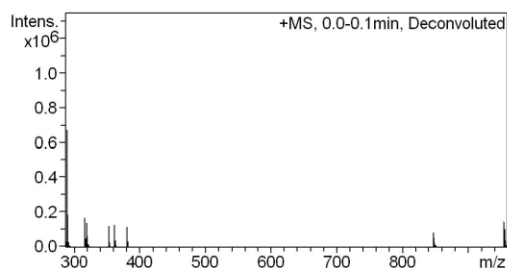

| # | m/z      | Res. | S/N | I      | I %   |
|---|----------|------|-----|--------|-------|
| 1 | 288.1511 |      |     | 95200  | 14.2  |
| 2 | 290.1677 |      |     | 668205 | 100.0 |
| 3 | 317.1312 |      |     | 161872 | 24.2  |
| 4 | 320.1230 |      |     | 133307 | 20.0  |
| 5 | 353.2678 |      |     | 115618 | 17.3  |
| 6 | 362.1871 |      |     | 121261 | 18.1  |
| 7 | 381.2988 |      |     | 109951 | 16.5  |
| 8 | 845.4804 |      |     | 76859  | 11.5  |
| 9 | 952.6159 |      |     | 140419 | 21.0  |

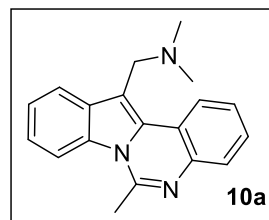

**Figure S34.** Copy of HRMS (ESI) spectra of compound **10a**.

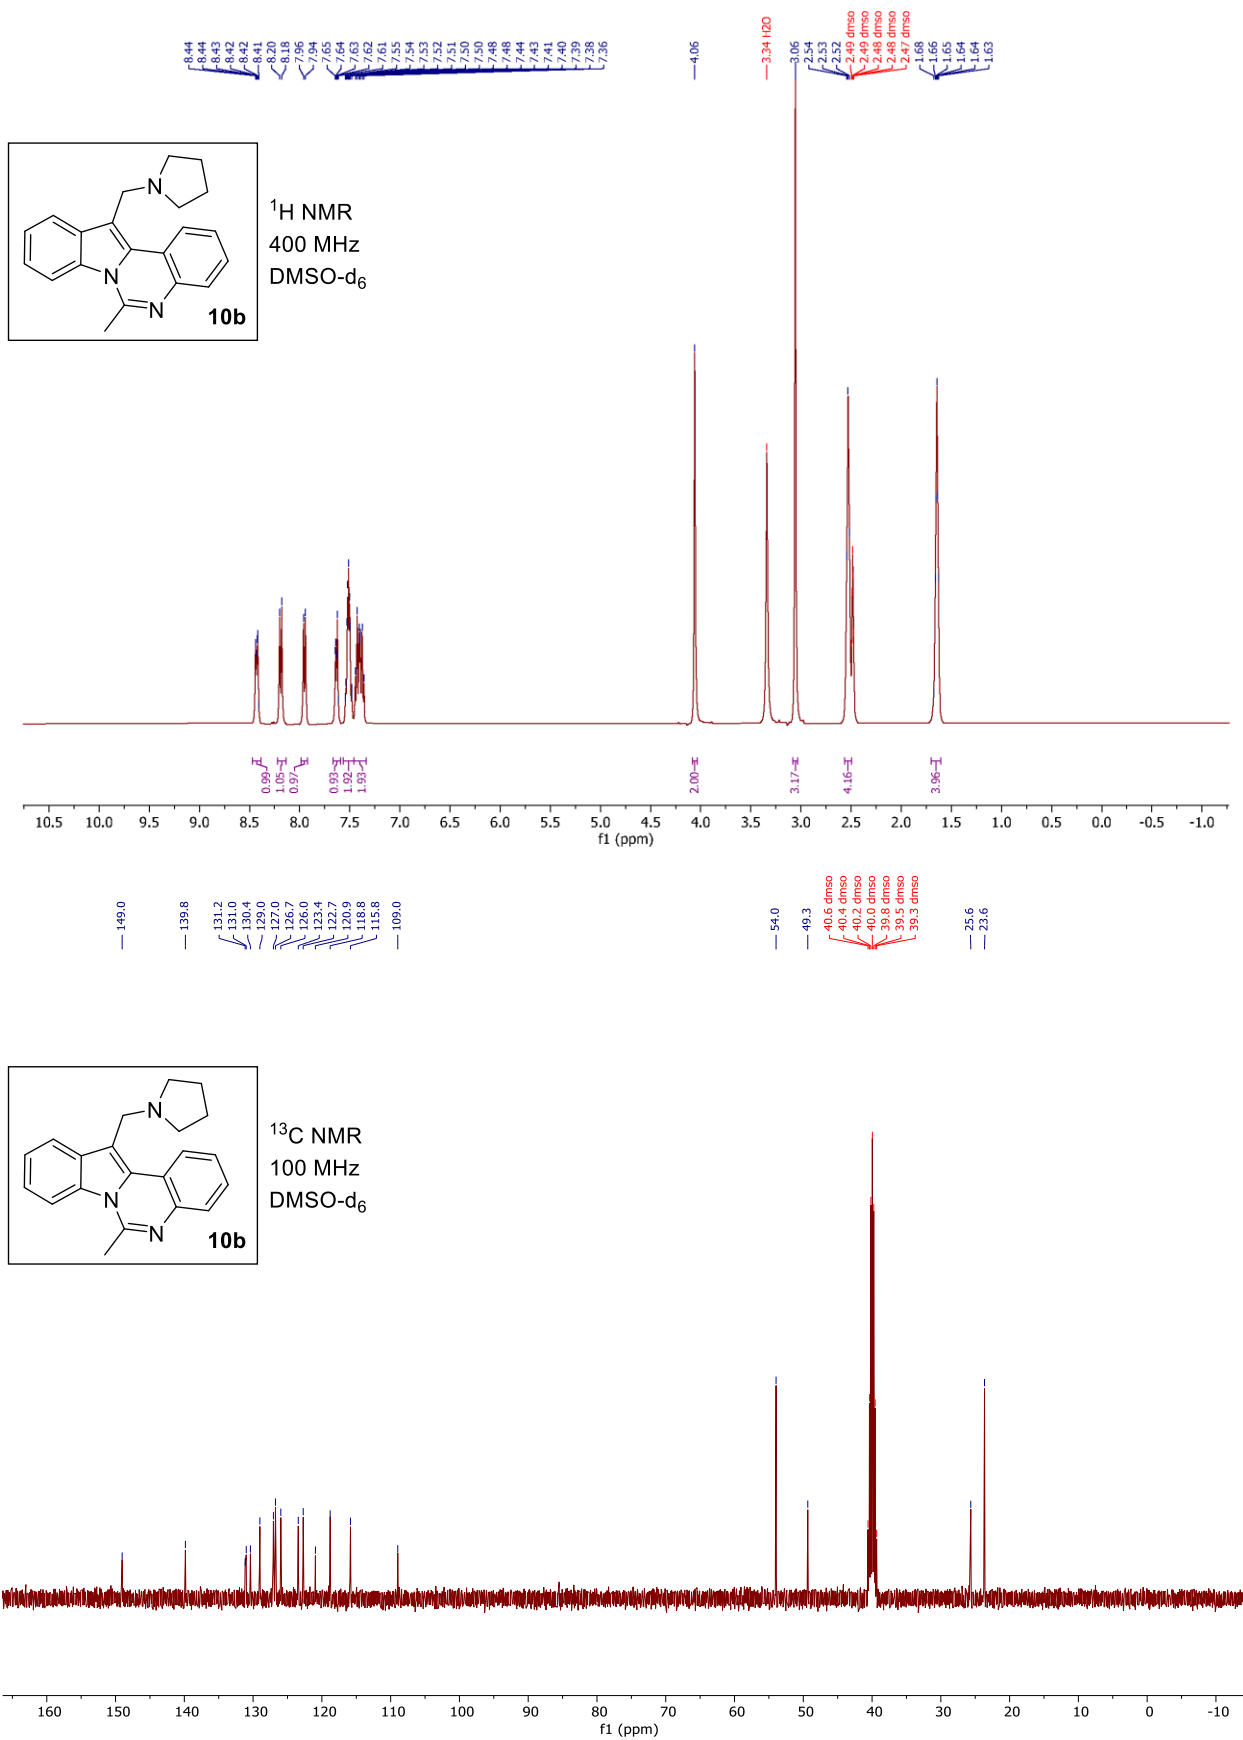

**Figure S35.** <sup>1</sup>H and <sup>13</sup>C NMR spectra of compound **10b**.

## Compound Spectrum List Report

### Analysis Info

Analysis Name D:\Data\AST\KDV-69.d  
 Method tune\_norm.m  
 Sample Name Tune wide  
 Comment

Acquisition Date 3/1/2025

Operator Mitrokhov  
 Instrument / Ser# microTOF-Q II 10225

### Acquisition Parameter

|             |            |                       |           |                  |           |
|-------------|------------|-----------------------|-----------|------------------|-----------|
| Source Type | ESI        | Ion Polarity          | Positive  | Set Nebulizer    | 0.4 Bar   |
| Focus       | Not active | Set Capillary         | 4500 V    | Set Dry Heater   | 180 °C    |
| Scan Begin  | 50 m/z     | Set End Plate Offset  | -500 V    | Set Dry Gas      | 4.0 l/min |
| Scan End    | 3000 m/z   | Set Collision Cell RF | 550.0 Vpp | Set Divert Valve | Source    |

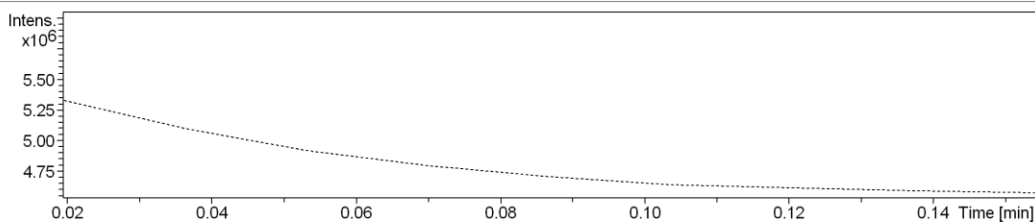

| #    | RT [min] | Area | Int. Type        | Intens. | S/N  | Chromatogram | Max. m/z |
|------|----------|------|------------------|---------|------|--------------|----------|
| n.a. | 0.1      | n.a. | Average spectrum | n.a.    | n.a. | n.a.         | 316.1819 |

### +MS, 0.0-0.1min #(2-8)

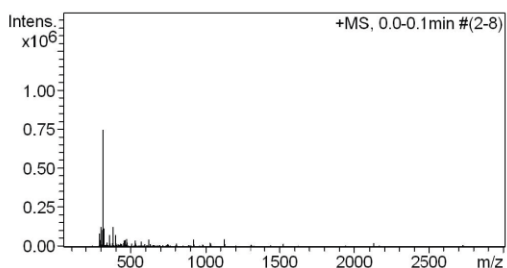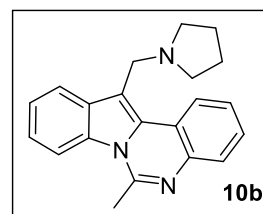

| #  | m/z      | Res. | S/N      | I      | I %   |
|----|----------|------|----------|--------|-------|
| 1  | 293.1746 | 5204 | 51249.3  | 80535  | 10.8  |
| 2  | 302.1653 | 5318 | 76733.9  | 120582 | 16.2  |
| 3  | 314.1629 | 5204 | 65558.2  | 103020 | 13.9  |
| 4  | 316.1819 | 4845 | 472432.5 | 742394 | 100.0 |
| 5  | 317.1835 | 5344 | 129812.6 | 203991 | 27.5  |
| 6  | 322.0483 | 5424 | 71338.6  | 112104 | 15.1  |
| 7  | 361.2228 | 5456 | 44991.9  | 70702  | 9.5   |
| 8  | 383.2037 | 5372 | 78445.2  | 123271 | 16.6  |
| 9  | 399.1779 | 5609 | 45014.5  | 70737  | 9.5   |
| 10 | 473.1098 | 5751 | 28759.5  | 45193  | 6.1   |

**Figure S36.** Copy of HRMS (ESI) spectra of compound **10b**.

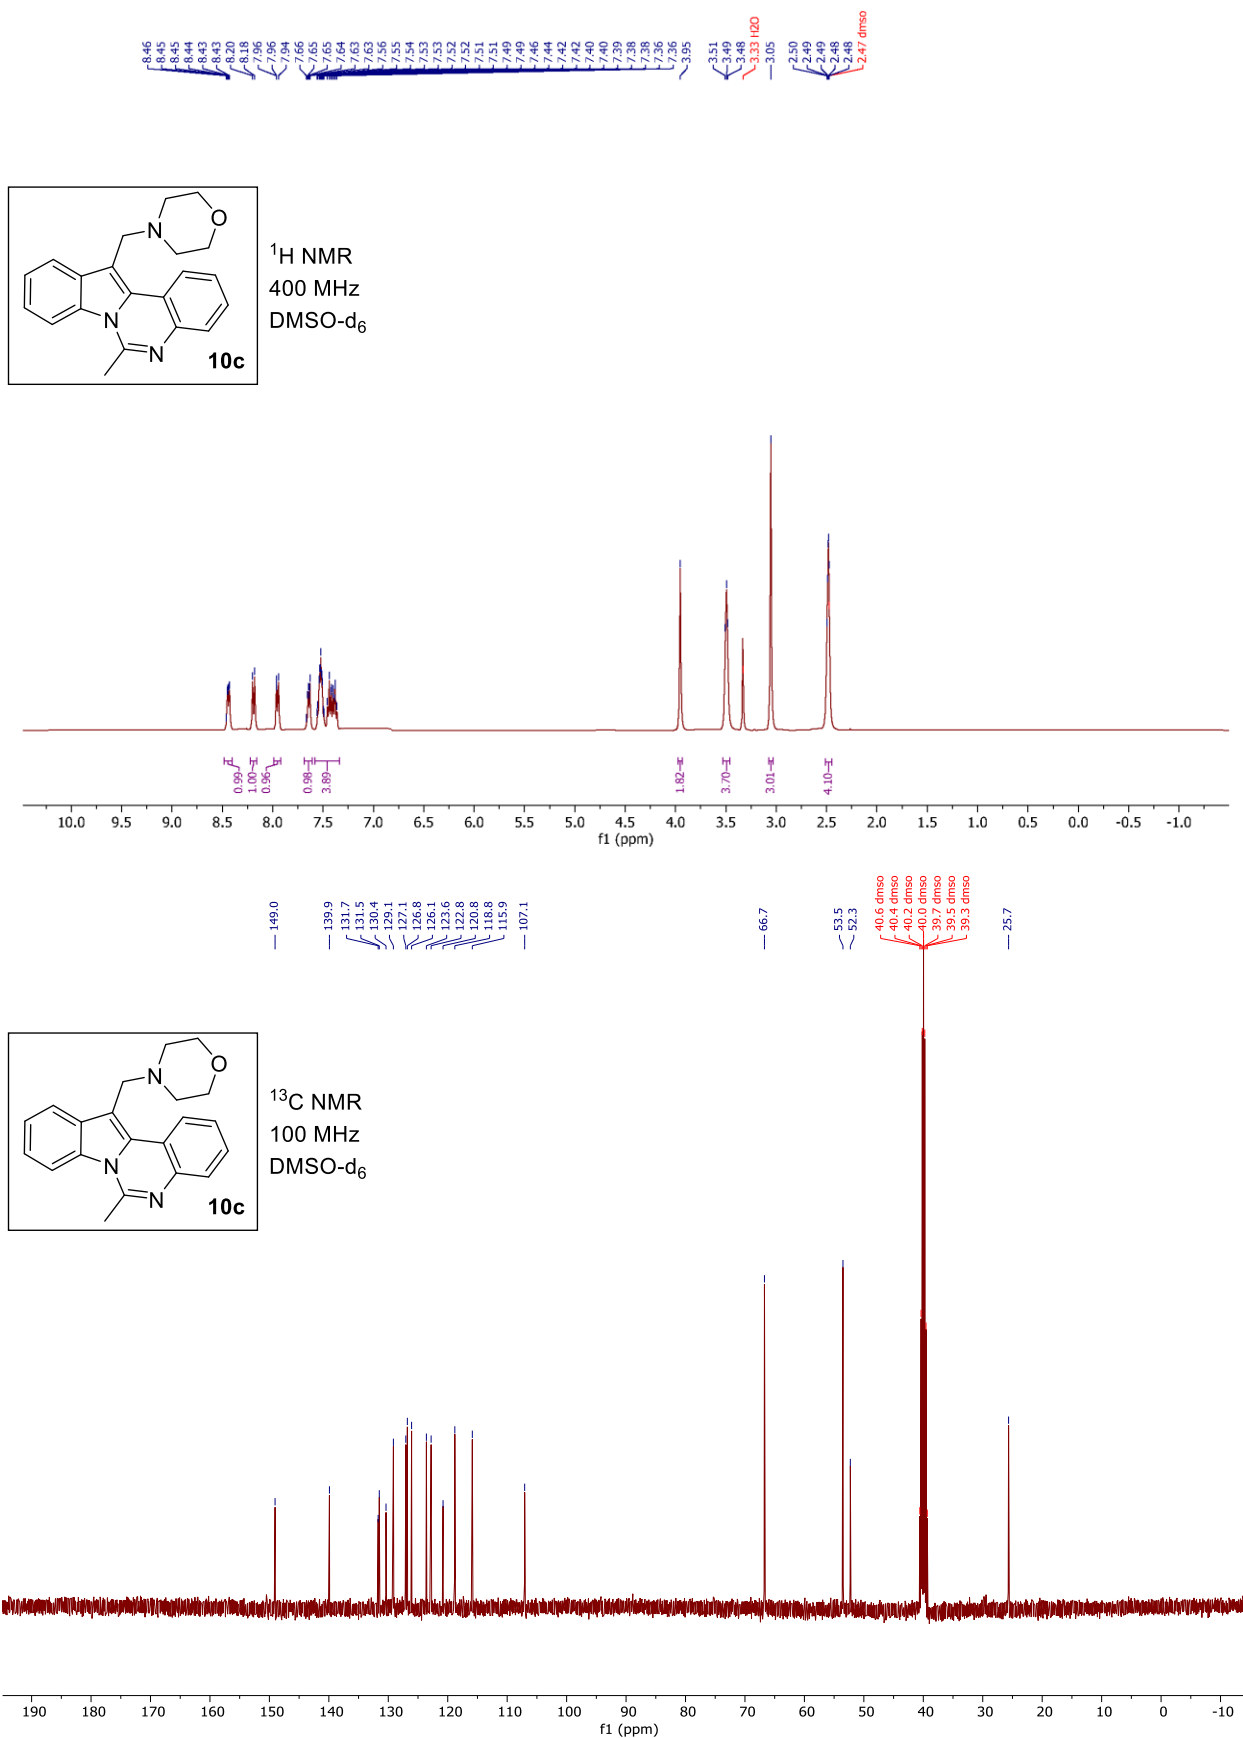

**Figure S37.** <sup>1</sup>H and <sup>13</sup>C NMR spectra of compound **10c**.

## Compound Spectrum List Report

### Analysis Info

Analysis Name D:\Data\AST\KDV-45().d  
 Method tune\_norm.m  
 Sample Name Tune wide  
 Comment

Acquisition Date 1/19/2025

Operator Mitrokhov  
 Instrument / Ser# microTOF-Q II 10225

### Acquisition Parameter

|             |            |                       |           |                  |           |
|-------------|------------|-----------------------|-----------|------------------|-----------|
| Source Type | ESI        | Ion Polarity          | Positive  | Set Nebulizer    | 0.4 Bar   |
| Focus       | Not active | Set Capillary         | 4500 V    | Set Dry Heater   | 180 °C    |
| Scan Begin  | 50 m/z     | Set End Plate Offset  | -500 V    | Set Dry Gas      | 4.0 l/min |
| Scan End    | 3000 m/z   | Set Collision Cell RF | 550.0 Vpp | Set Divert Valve | Source    |

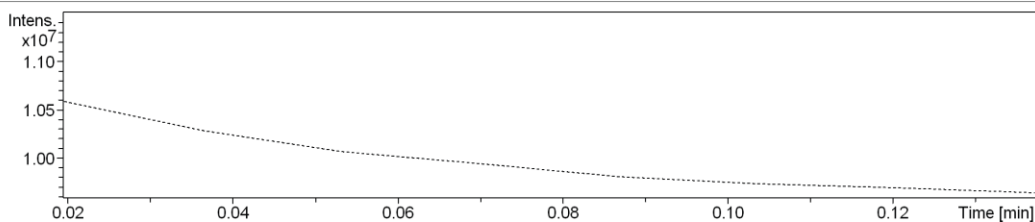

| #    | RT [min] | Area | Int. Type        | Intens. | S/N  | Chromatogram | Max. m/z |
|------|----------|------|------------------|---------|------|--------------|----------|
| n.a. | 0.1      | n.a. | Average spectrum | n.a.    | n.a. | n.a.         | 332.1748 |

### +MS, 0.0-0.1min #(2-7)

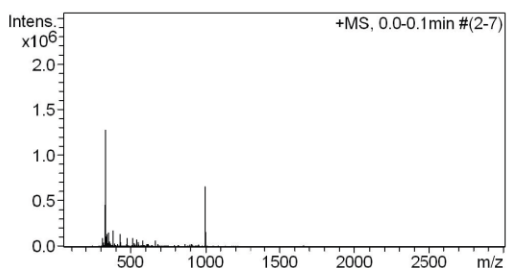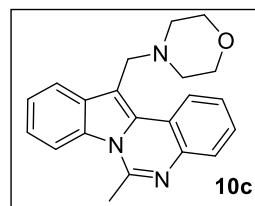

| #  | m/z      | Res. | S/N      | I       | I %   |
|----|----------|------|----------|---------|-------|
| 1  | 330.1603 | 5112 | 246424.1 | 451778  | 35.5  |
| 2  | 332.1748 | 3834 | 693610.7 | 1271620 | 100.0 |
| 3  | 333.1800 | 4984 | 405887.6 | 744127  | 58.5  |
| 4  | 341.3039 | 5470 | 71185.0  | 130506  | 10.3  |
| 5  | 353.2660 | 5397 | 80656.5  | 147870  | 11.6  |
| 6  | 381.2970 | 5432 | 91733.2  | 168178  | 13.2  |
| 7  | 431.2425 | 5568 | 72098.7  | 132181  | 10.4  |
| 8  | 994.6232 | 6345 | 357164.6 | 654802  | 51.5  |
| 9  | 995.6252 | 6532 | 253116.3 | 464047  | 36.5  |
| 10 | 996.6272 | 6549 | 87736.6  | 160851  | 12.6  |

**Figure S38.** Copy of HRMS (ESI) spectra of compound **10c**.

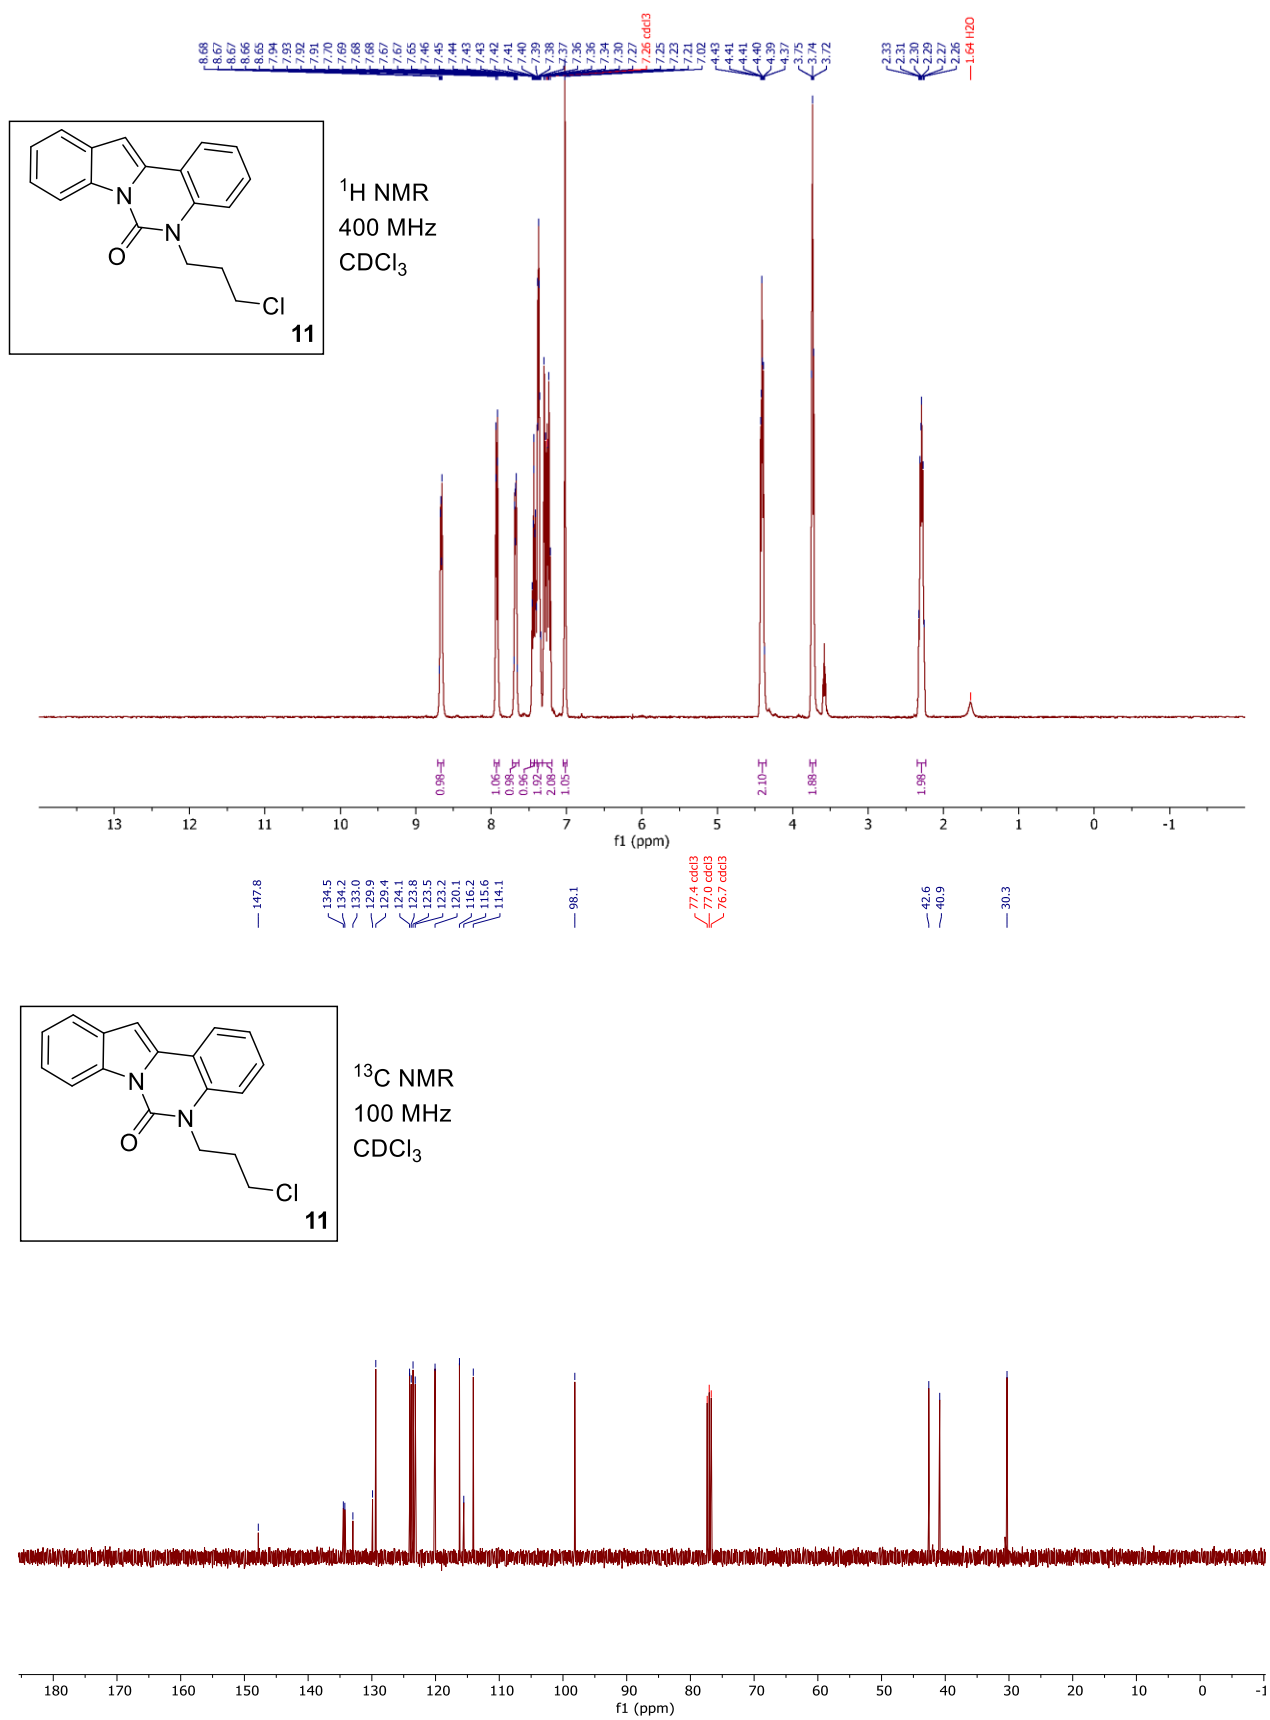

**Figure S39.** <sup>1</sup>H and <sup>13</sup>C NMR spectra of compound **11**.

## Compound Spectrum List Report

### Analysis Info

Analysis Name D:\Data\AST\VAL-142().d  
 Method tune\_norm.m  
 Sample Name Tune wide  
 Comment

Acquisition Date 6/29/2025

Operator Mitrokhov  
 Instrument / Ser# microTOF-Q II 10225

### Acquisition Parameter

|             |            |                       |           |                  |           |
|-------------|------------|-----------------------|-----------|------------------|-----------|
| Source Type | ESI        | Ion Polarity          | Positive  | Set Nebulizer    | 0.4 Bar   |
| Focus       | Not active | Set Capillary         | 4500 V    | Set Dry Heater   | 180 °C    |
| Scan Begin  | 50 m/z     | Set End Plate Offset  | -500 V    | Set Dry Gas      | 4.0 l/min |
| Scan End    | 3000 m/z   | Set Collision Cell RF | 550.0 Vpp | Set Divert Valve | Source    |

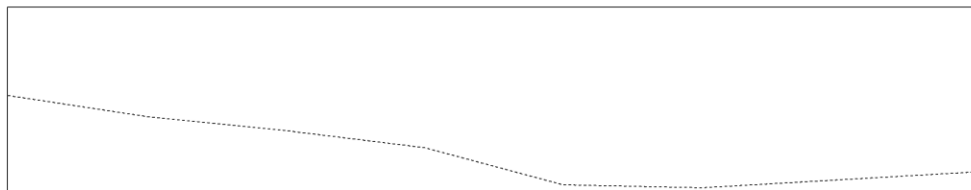

| #    | RT [min] | Area | Int. Type        | Intens. | S/N  | Chromatogram | Max. m/z |
|------|----------|------|------------------|---------|------|--------------|----------|
| n.a. | 0.1      | n.a. | Average spectrum | n.a.    | n.a. | n.a.         | 311.0955 |

### +MS, 0.0-0.1min #(2-6)

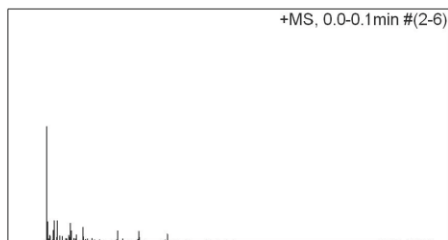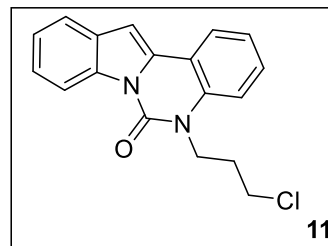

| #  | m/z      | Res. | S/N      | I      | I %   |
|----|----------|------|----------|--------|-------|
| 1  | 311.0955 | 5250 | 124893.2 | 274765 | 100.0 |
| 2  | 312.1040 | 5394 | 25271.4  | 55597  | 20.2  |
| 3  | 313.0984 | 5510 | 46011.9  | 101226 | 36.8  |
| 4  | 319.0745 | 5789 | 21882.3  | 48141  | 17.5  |
| 5  | 357.0491 | 5506 | 12727.7  | 28001  | 10.2  |
| 6  | 361.2283 | 5591 | 22926.4  | 50438  | 18.4  |
| 7  | 383.2122 | 5590 | 23325.5  | 51316  | 18.7  |
| 8  | 471.1119 | 5493 | 20567.5  | 45248  | 16.5  |
| 9  | 477.8143 | 6243 | 12427.9  | 27341  | 10.0  |
| 10 | 555.1395 | 5818 | 16022.9  | 35250  | 12.8  |

**Figure S40.** Copy of HRMS (ESI) spectra of compound **11**.

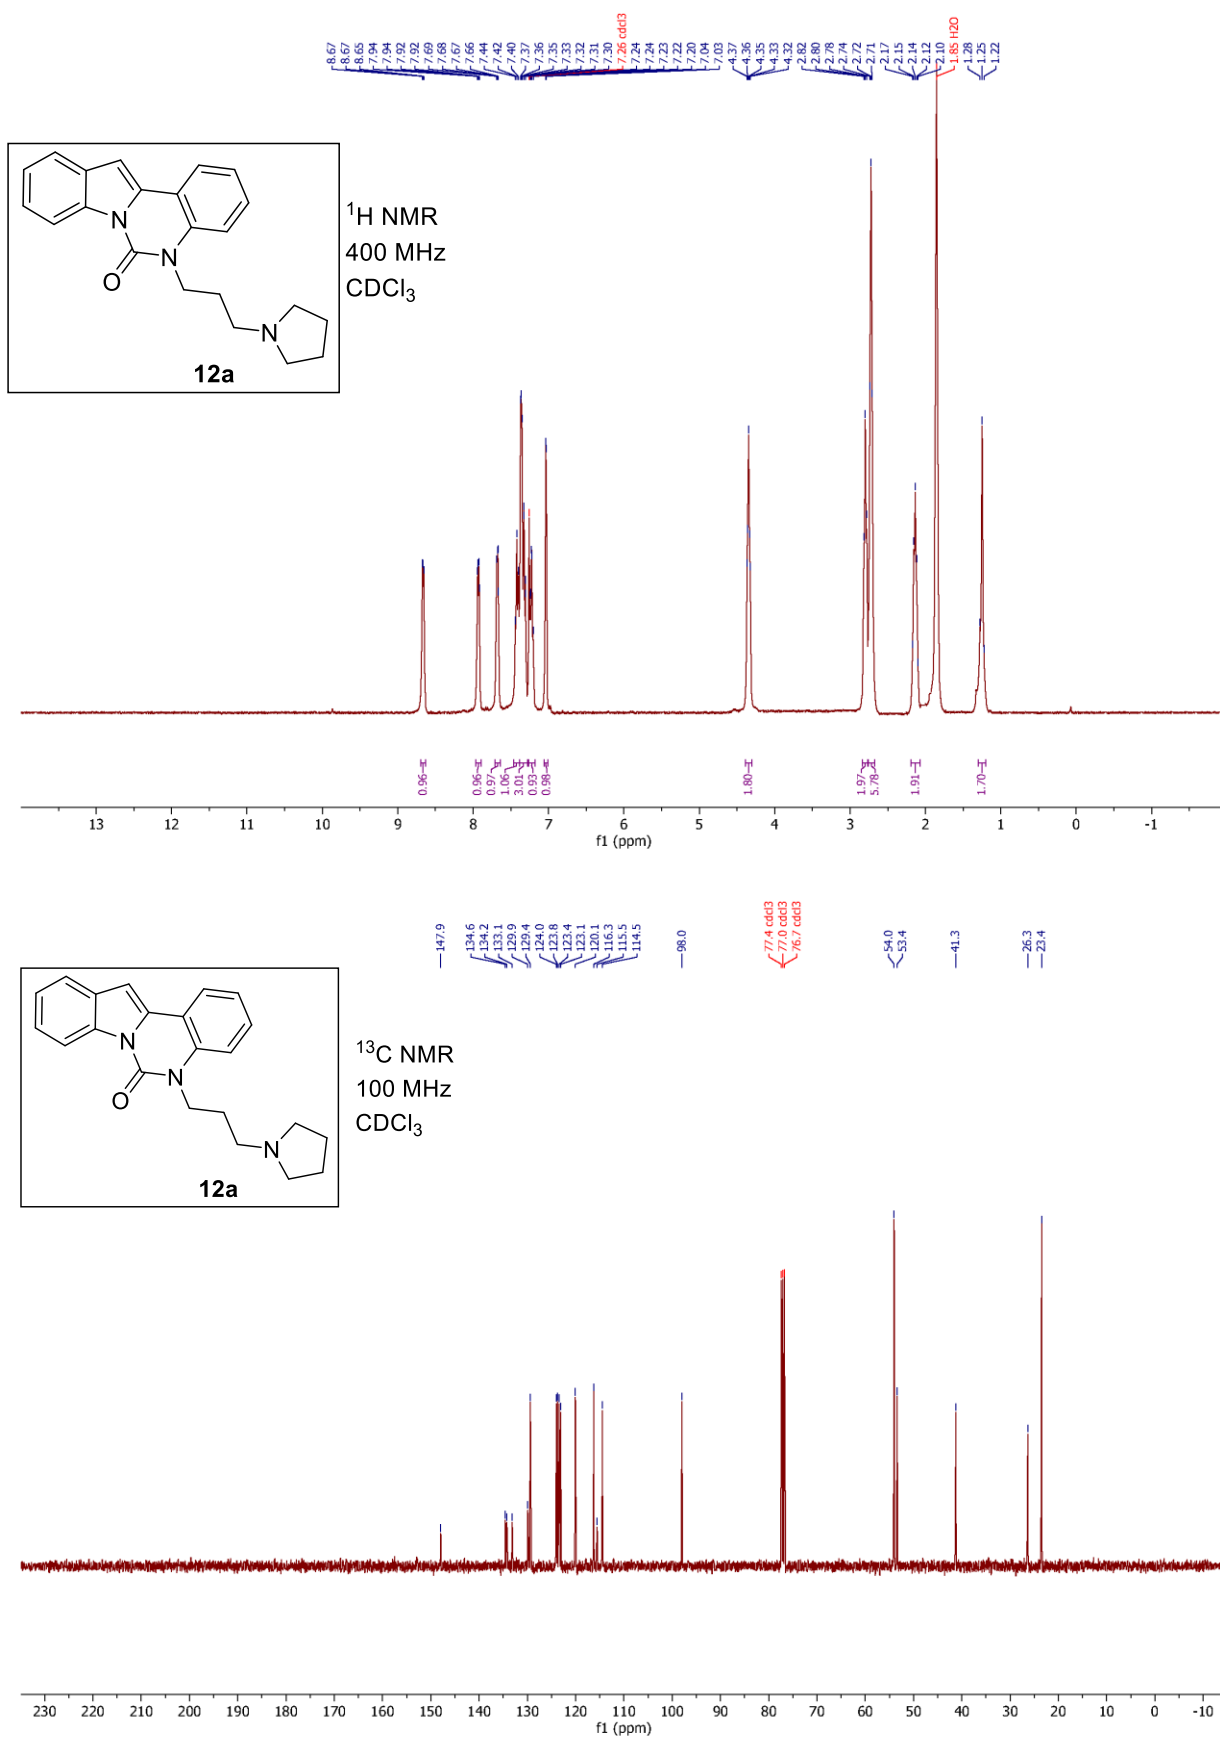

**Figure S41.** <sup>1</sup>H and <sup>13</sup>C NMR spectra of compound **12a**.



## Compound Spectrum List Report

### Analysis Info

Analysis Name D:\Data\Litvinova\VAL-146.d  
 Method tune\_norm.m  
 Sample Name Tune wide  
 Comment

Acquisition Date 6/28/2025

Operator Mitrokhov  
 Instrument / Ser# microTOF-Q II 10225

### Acquisition Parameter

|             |          |                       |           |                  |           |
|-------------|----------|-----------------------|-----------|------------------|-----------|
| Source Type | ESI      | Ion Polarity          | Positive  | Set Nebulizer    | 0.4 Bar   |
| Focus       | Active   | Set Capillary         | 4500 V    | Set Dry Heater   | 180 °C    |
| Scan Begin  | 50 m/z   | Set End Plate Offset  | -500 V    | Set Dry Gas      | 4.0 l/min |
| Scan End    | 3000 m/z | Set Collision Cell RF | 550.0 Vpp | Set Divert Valve | Source    |

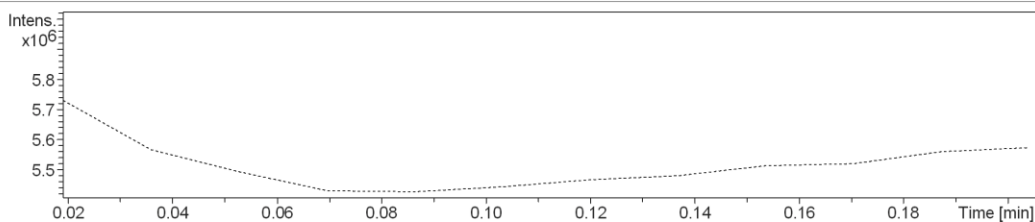

| #    | RT [min] | Area | Int. Type        | Intens. | S/N  | Chromatogram | Max. m/z |
|------|----------|------|------------------|---------|------|--------------|----------|
| n.a. | 0.1      | n.a. | Average spectrum | n.a.    | n.a. | n.a.         | 346.1925 |

### +MS, 0.1-0.2min #(3-10)

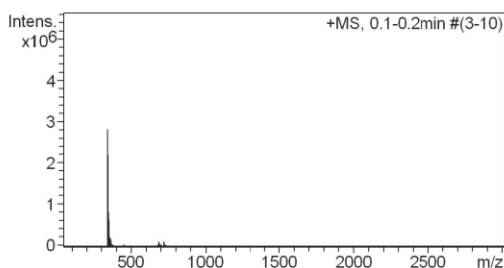

| #  | m/z      | Res.  | S/N     | I       | I %   |
|----|----------|-------|---------|---------|-------|
| 1  | 344.1878 | 10152 | 415.1   | 52987   | 1.9   |
| 2  | 346.1925 | 19625 | 22135.5 | 2817008 | 100.0 |
| 3  | 347.2109 | 14022 | 6340.3  | 805829  | 28.6  |
| 4  | 348.2099 | 10120 | 694.3   | 88151   | 3.1   |
| 5  | 362.2000 | 11023 | 1317.9  | 164192  | 5.8   |
| 6  | 363.2025 | 9808  | 308.2   | 38359   | 1.4   |
| 7  | 685.3503 | 12603 | 722.2   | 93417   | 3.3   |
| 8  | 686.3535 | 11497 | 346.2   | 44872   | 1.6   |
| 9  | 723.3893 | 12342 | 640.5   | 88550   | 3.1   |
| 10 | 724.3917 | 11397 | 312.4   | 43281   | 1.5   |

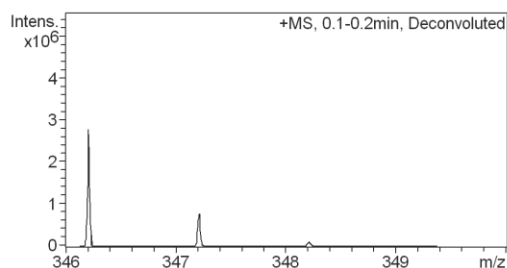

| # | m/z      | Res. | S/N | I       | I %   |
|---|----------|------|-----|---------|-------|
| 1 | 346.2091 |      |     | 2817008 | 100.0 |

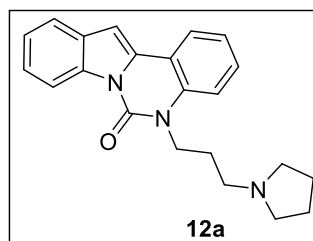

**Figure S42.** Copy of HRMS (ESI) spectra of compound **12a**.

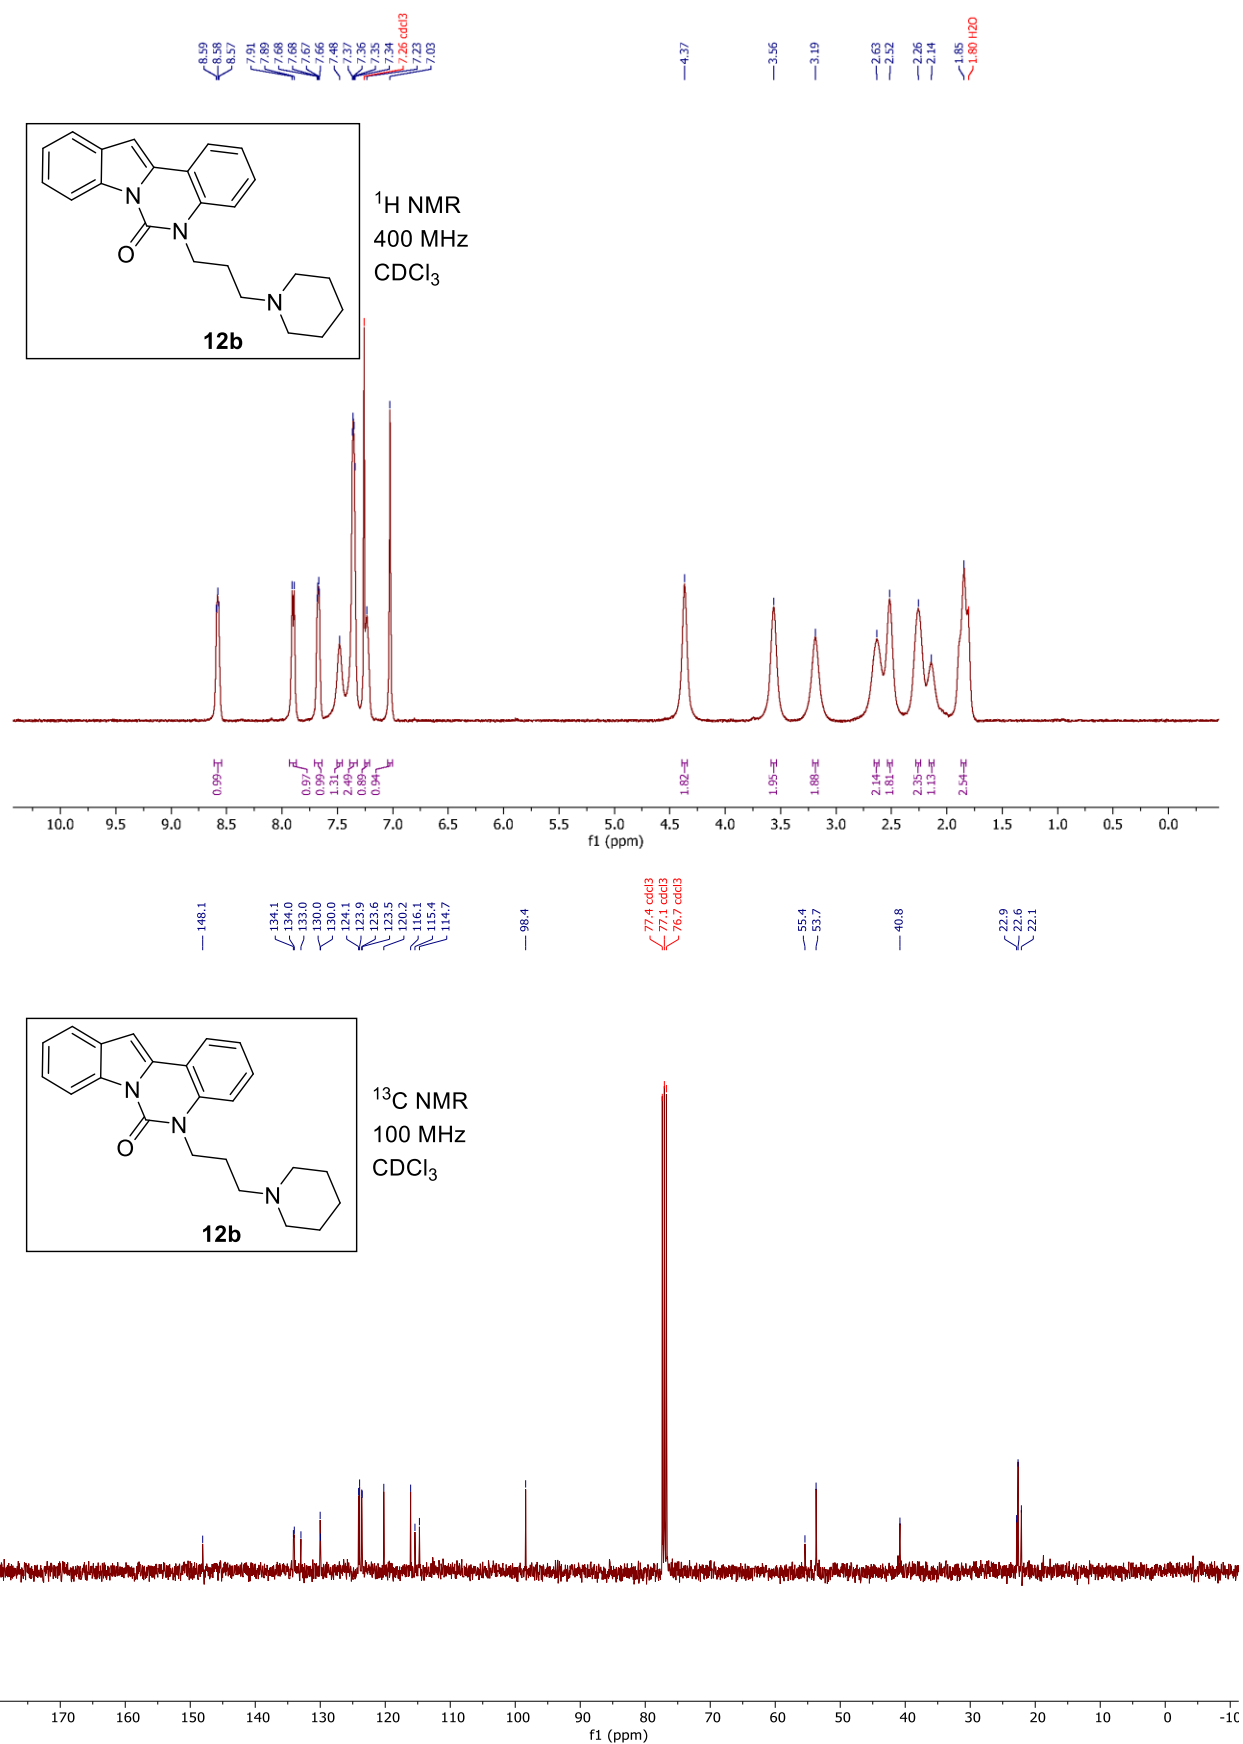

**Figure S43.** <sup>1</sup>H and <sup>13</sup>C NMR spectra of compound **12b**.

## Compound Spectrum List Report

### Analysis Info

Analysis Name D:\Data\Litvinova\VAL-153().d  
 Method tune\_norm.m  
 Sample Name Tune wide  
 Comment

Acquisition Date 4/23/2023

Operator Mitrokhov  
 Instrument / Ser# microTOF-Q II 10225

### Acquisition Parameter

|             |          |                       |           |                  |           |
|-------------|----------|-----------------------|-----------|------------------|-----------|
| Source Type | ESI      | Ion Polarity          | Positive  | Set Nebulizer    | 0.4 Bar   |
| Focus       | Active   | Set Capillary         | 4500 V    | Set Dry Heater   | 180 °C    |
| Scan Begin  | 50 m/z   | Set End Plate Offset  | -500 V    | Set Dry Gas      | 4.0 l/min |
| Scan End    | 3000 m/z | Set Collision Cell RF | 550.0 Vpp | Set Divert Valve | Source    |

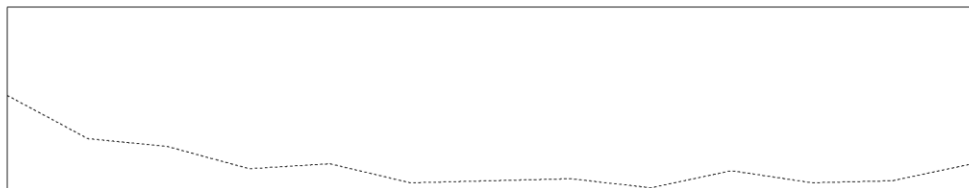

| #    | RT [min] | Area | Int. Type        | Intens. | S/N  | Chromatogram | Max. m/z |
|------|----------|------|------------------|---------|------|--------------|----------|
| n.a. | 0.1      | n.a. | Average spectrum | n.a.    | n.a. | n.a.         | 360.2081 |

### +MS, 0.1-0.2min #(4-11)

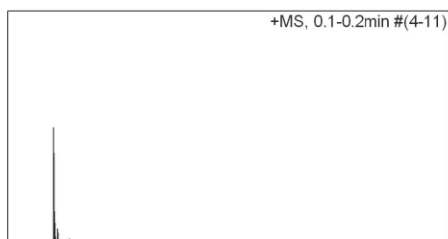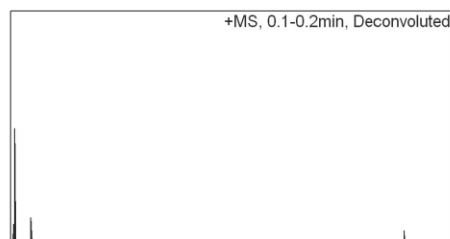

| #  | m/z      | Res.  | S/N    | I       | I %   |
|----|----------|-------|--------|---------|-------|
| 1  | 360.2081 | 14165 | 5870.3 | 1307348 | 100.0 |
| 2  | 361.2088 | 11824 | 1374.6 | 307183  | 23.5  |
| 3  | 362.2087 | 10045 | 192.5  | 43217   | 3.3   |
| 4  | 374.1831 | 9435  | 150.2  | 35064   | 2.7   |
| 5  | 375.1878 | 9563  | 132.6  | 31066   | 2.4   |
| 6  | 376.1969 | 9421  | 186.0  | 43681   | 3.3   |
| 7  | 383.2008 | 11215 | 727.3  | 174299  | 13.3  |
| 8  | 384.2015 | 9706  | 143.4  | 34555   | 2.6   |
| 9  | 464.2303 | 10660 | 197.3  | 59156   | 4.5   |
| 10 | 515.7894 | 11083 | 86.7   | 29427   | 2.3   |

| # | m/z      | Res. | S/N | I       | I %   |
|---|----------|------|-----|---------|-------|
| 1 | 360.2086 |      |     | 1307347 | 100.0 |
| 2 | 383.2003 |      |     | 174298  | 13.3  |

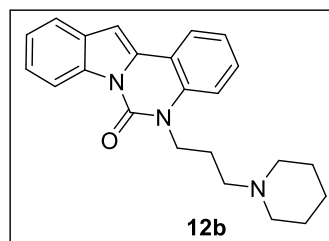

**Figure S44.** Copy of HRMS (ESI) spectra of compound **12b**.

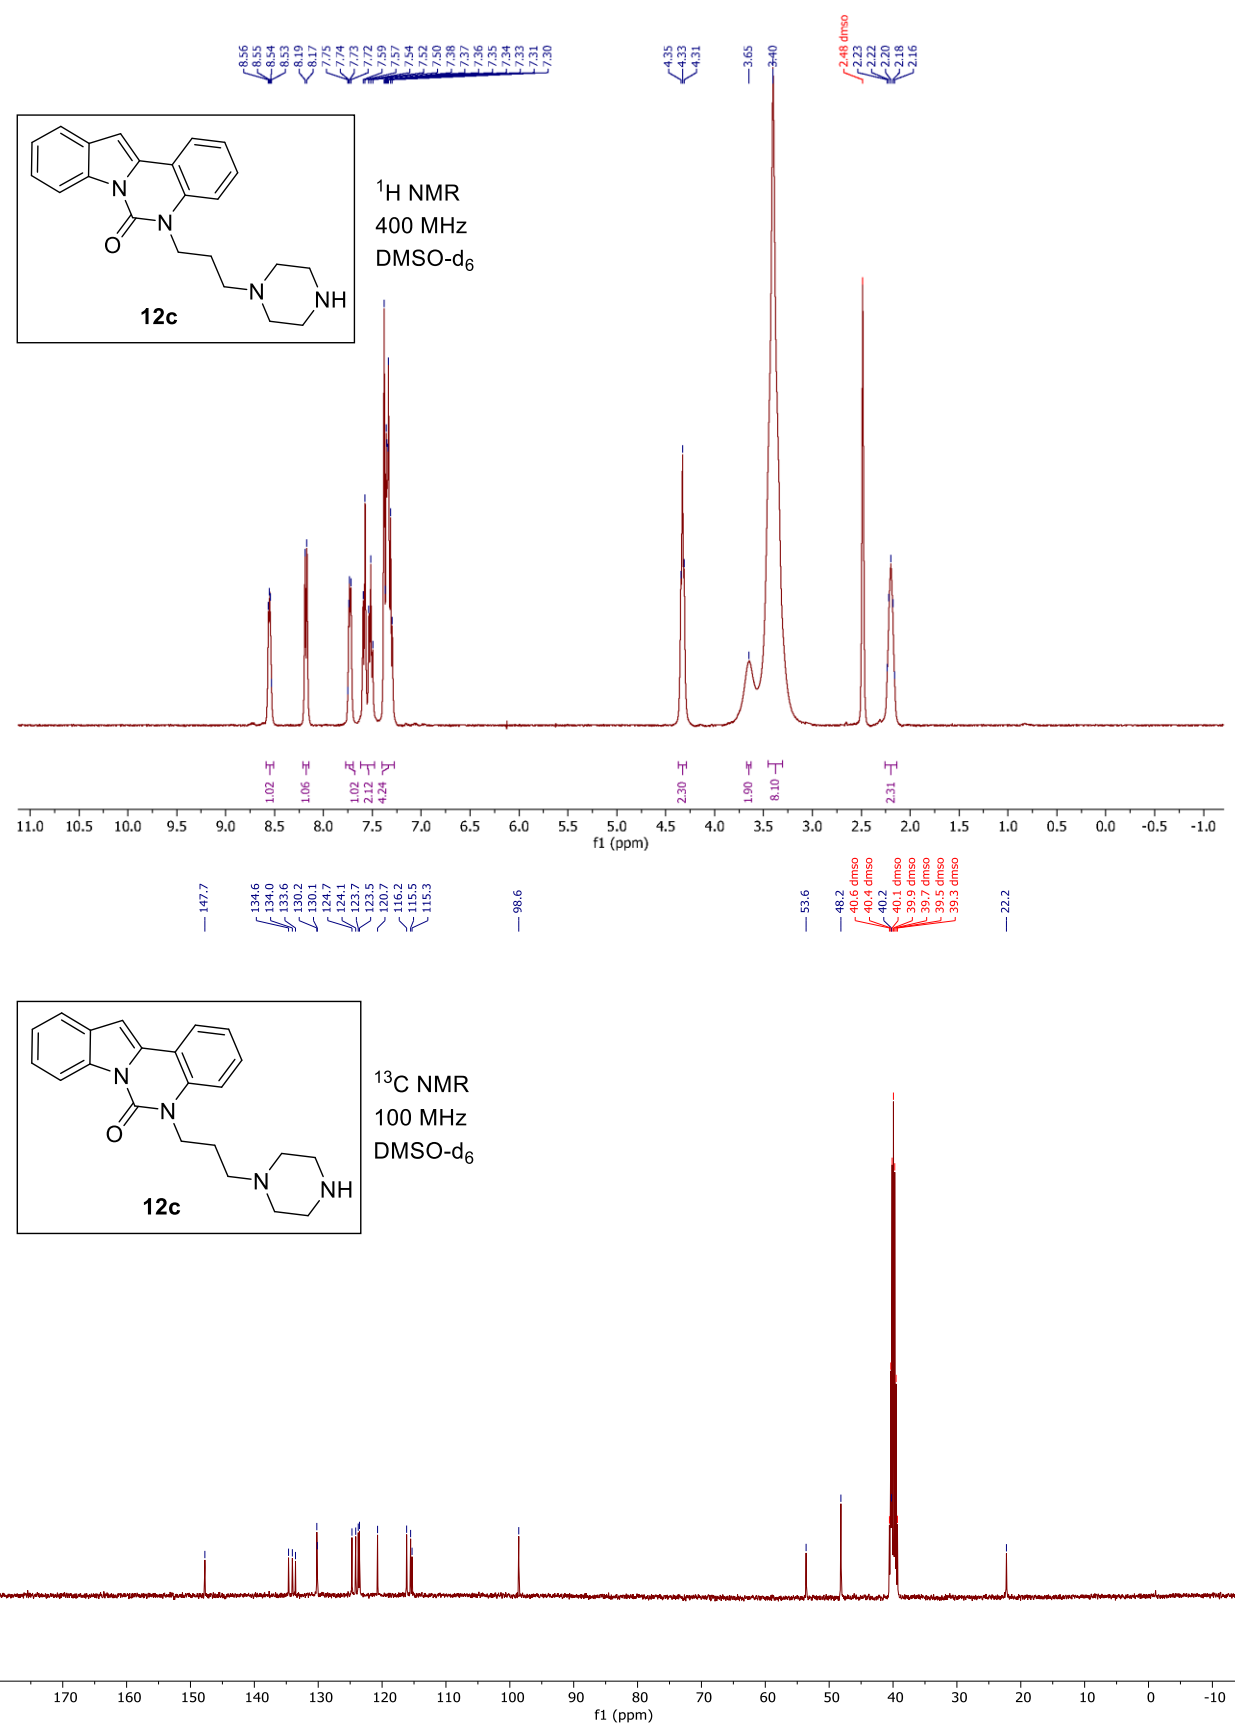

**Figure S45.** <sup>1</sup>H and <sup>13</sup>C NMR spectra of compound **12c**.

## Compound Spectrum List Report

### Analysis Info

Analysis Name D:\Data\Litvinova\VAL-157.d  
 Method tune\_norm.m  
 Sample Name Tune wide  
 Comment

Acquisition Date 6/29/2025

Operator Mitrokhov  
 Instrument / Ser# microTOF-Q II 10225

### Acquisition Parameter

|             |          |                       |           |                  |           |
|-------------|----------|-----------------------|-----------|------------------|-----------|
| Source Type | ESI      | Ion Polarity          | Positive  | Set Nebulizer    | 0.4 Bar   |
| Focus       | Active   | Set Capillary         | 4500 V    | Set Dry Heater   | 180 °C    |
| Scan Begin  | 50 m/z   | Set End Plate Offset  | -500 V    | Set Dry Gas      | 4.0 l/min |
| Scan End    | 3000 m/z | Set Collision Cell RF | 550.0 Vpp | Set Divert Valve | Source    |

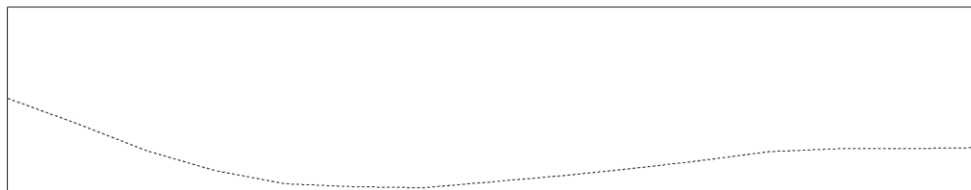

| #    | RT [min] | Area | Int. Type        | Intens. | S/N  | Chromatogram | Max. m/z |
|------|----------|------|------------------|---------|------|--------------|----------|
| n.a. | 0.1      | n.a. | Average spectrum | n.a.    | n.a. | n.a.         | 361.2013 |

### +MS, 0.1-0.2min #(3-13)

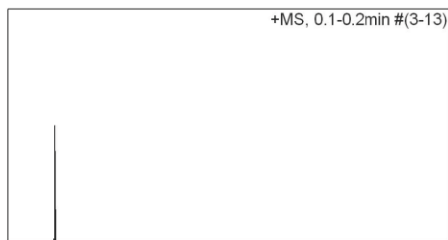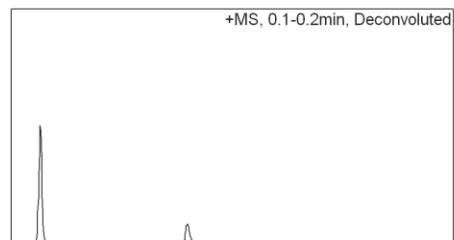

| #  | m/z      | Res.  | S/N     | I      | I %   |
|----|----------|-------|---------|--------|-------|
| 1  | 341.2985 | 11666 | 114.6   | 2009   | 0.3   |
| 2  | 357.1664 | 10869 | 346.8   | 6195   | 1.0   |
| 3  | 358.1704 | 9970  | 88.8    | 1588   | 0.3   |
| 4  | 359.1808 | 11816 | 871.4   | 15599  | 2.5   |
| 5  | 360.1830 | 11636 | 182.5   | 3271   | 0.5   |
| 6  | 361.2013 | 19220 | 34114.9 | 612088 | 100.0 |
| 7  | 362.1996 | 12248 | 4986.4  | 89569  | 14.6  |
| 8  | 363.2028 | 10300 | 338.4   | 6087   | 1.0   |
| 9  | 375.1758 | 10555 | 146.8   | 2677   | 0.4   |
| 10 | 383.1891 | 7747  | 97.0    | 1785   | 0.3   |

| # | m/z      | Res. | S/N    | I     | I % |
|---|----------|------|--------|-------|-----|
| 1 | 361.1991 |      | 612088 | 100.0 |     |

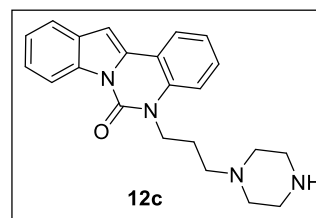

**Figure S46.** Copy of HRMS (ESI) spectra of compound **12c**.

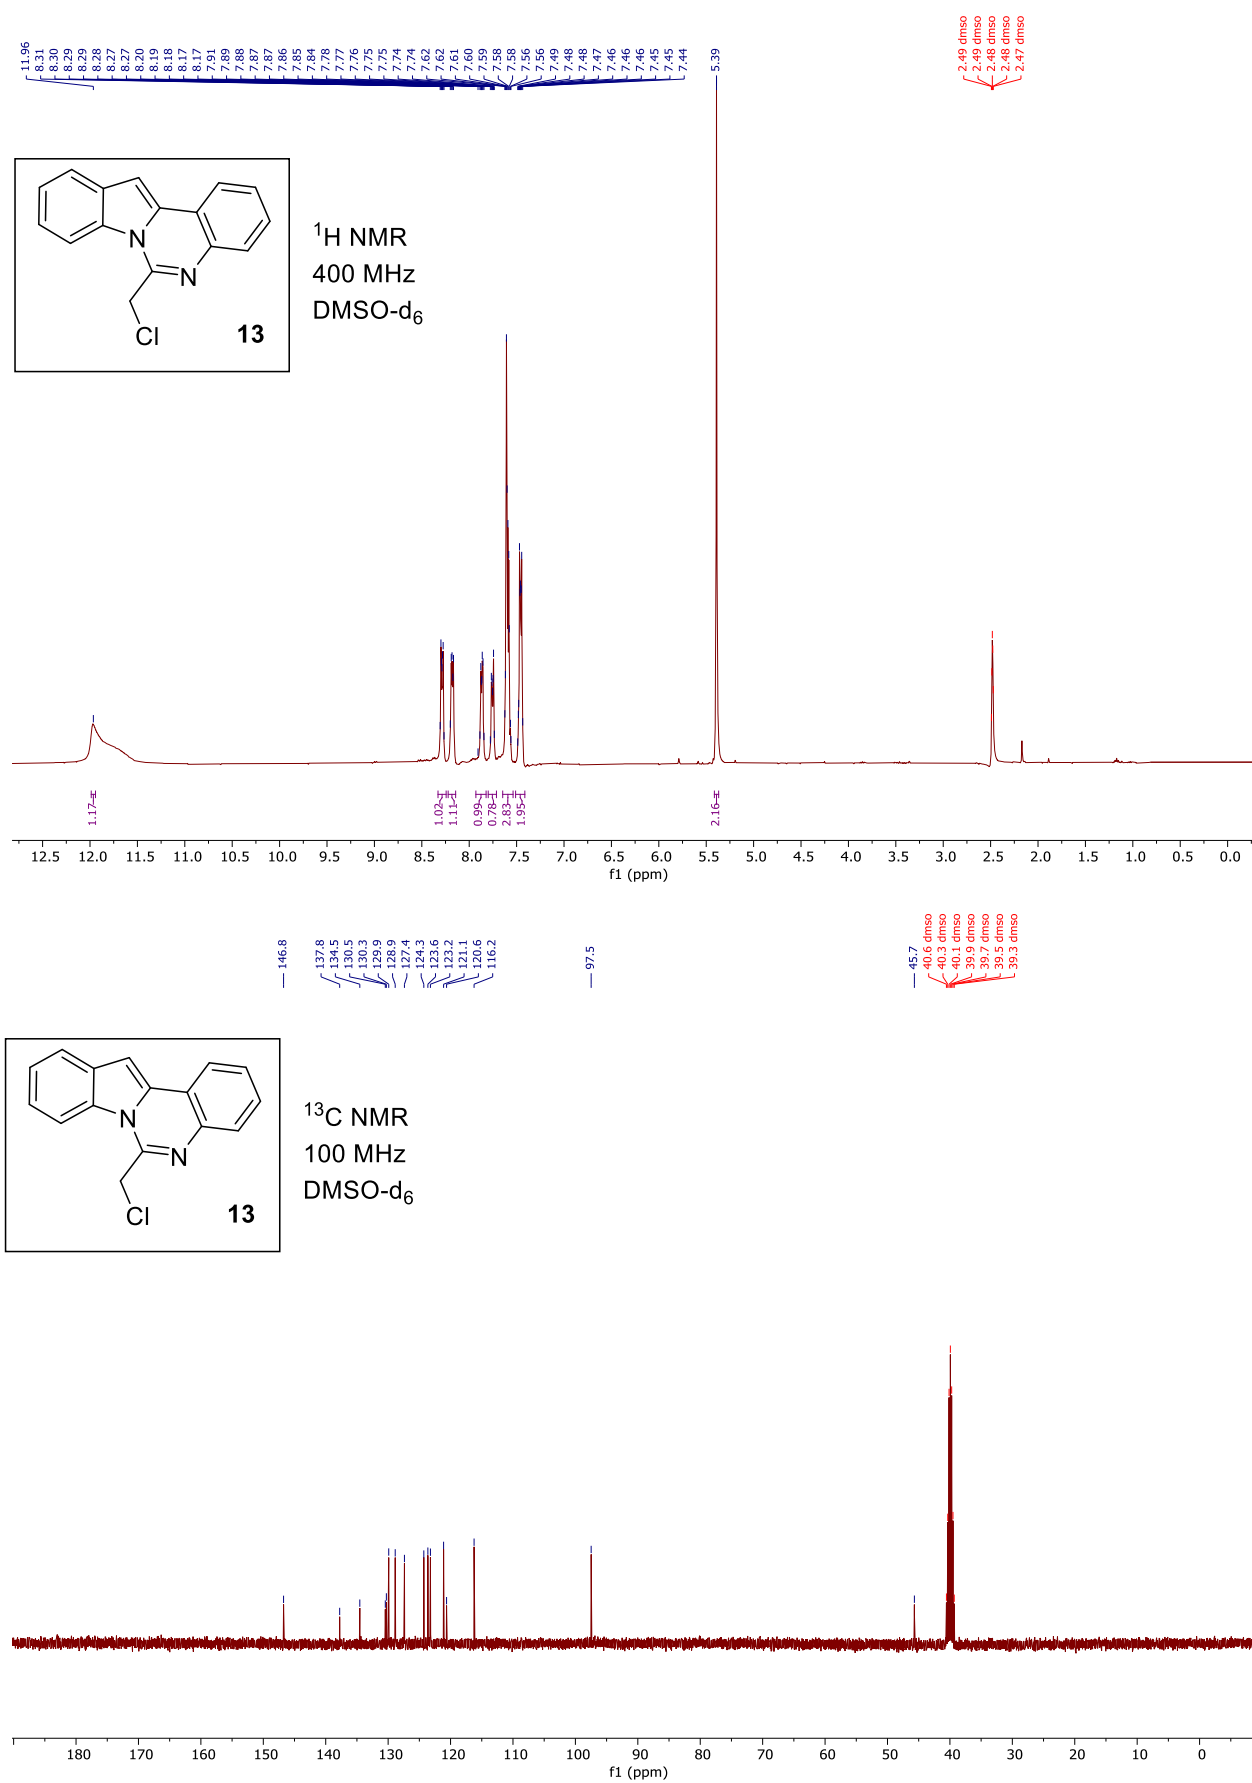

**Figure S47.** Copy of HRMS (ESI) spectra of compound **12c**.

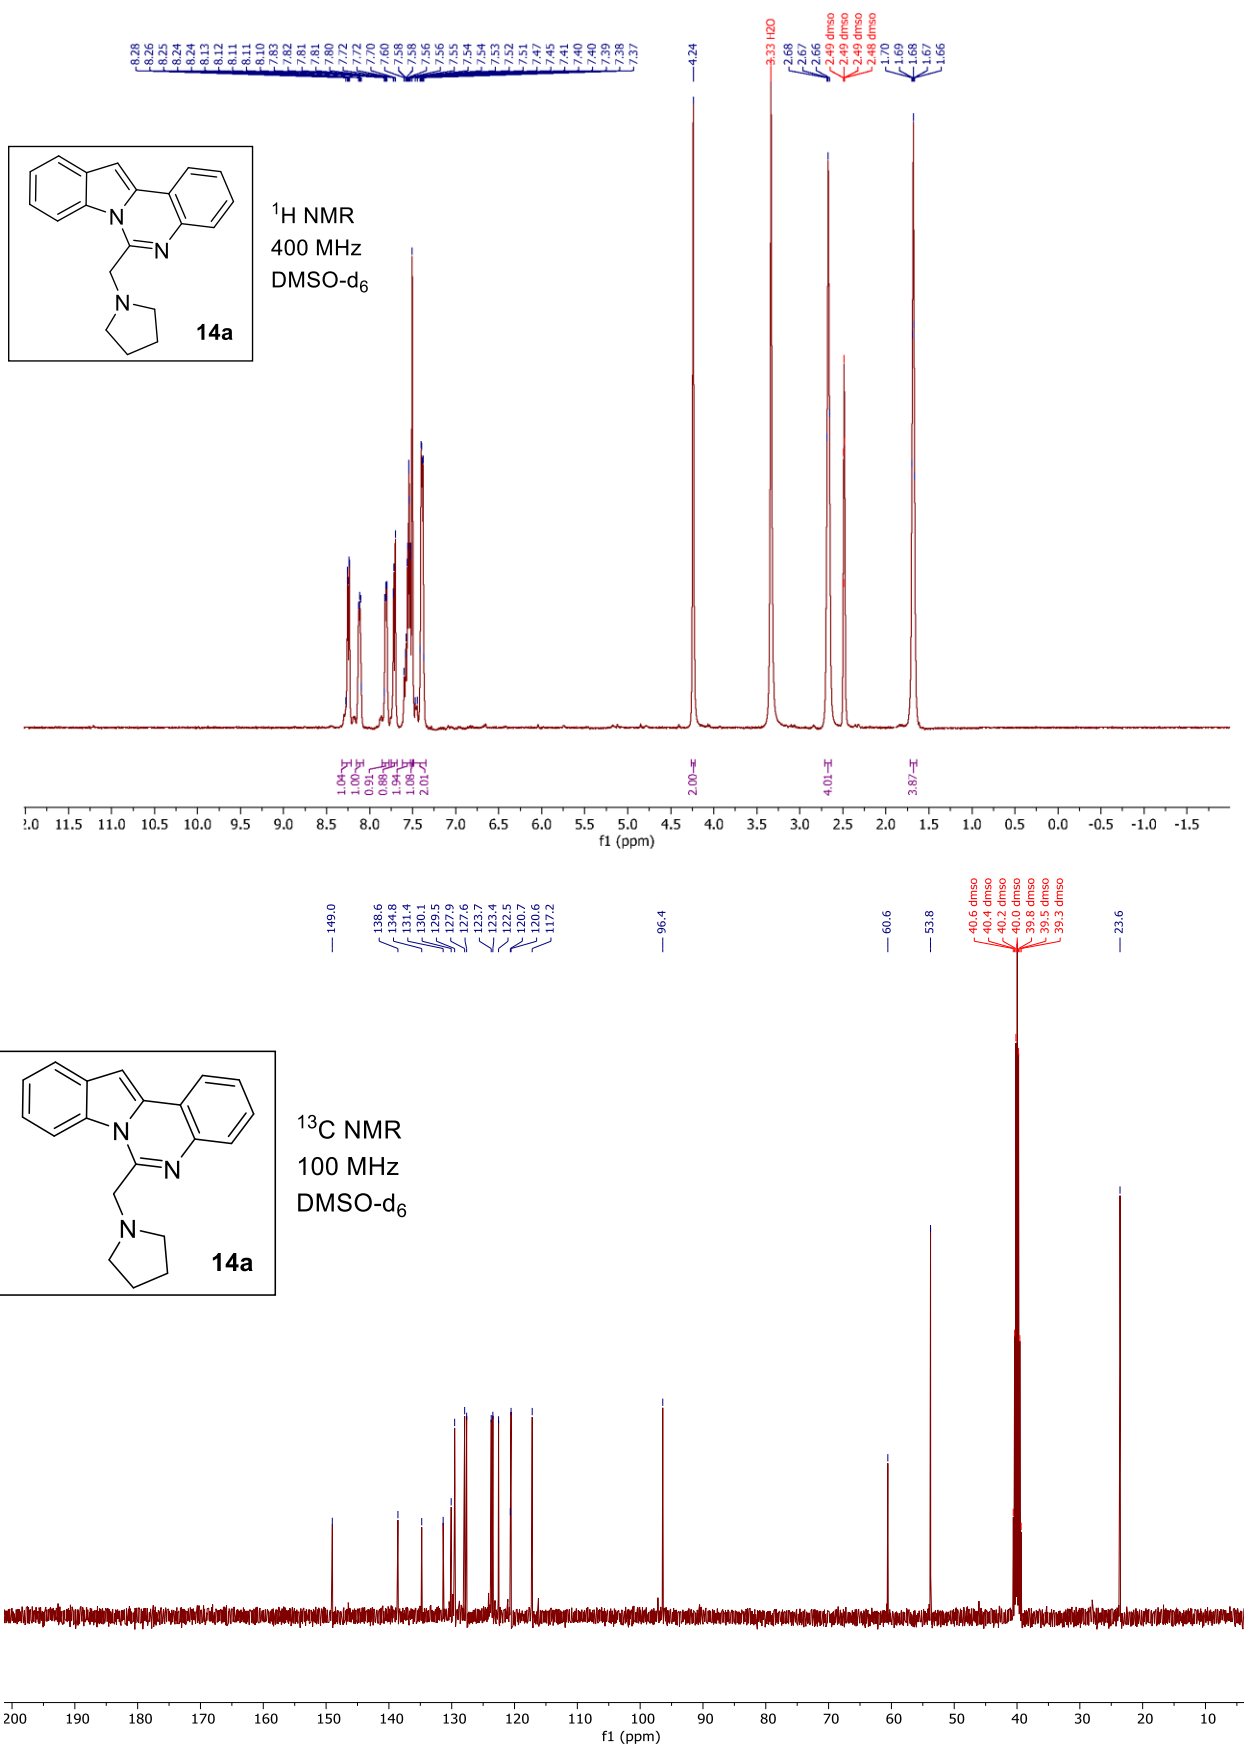

**Figure S48.** <sup>1</sup>H and <sup>13</sup>C NMR spectra of compound 14a.

## Compound Spectrum List Report

### Analysis Info

Analysis Name D:\Data\AST\KDV-68.d  
 Method tune\_norm.m  
 Sample Name Tune wide  
 Comment

Acquisition Date 6/27/2025

Operator Mitrokhov  
 Instrument / Ser# microTOF-Q II 10225

### Acquisition Parameter

|             |            |                       |           |                  |           |
|-------------|------------|-----------------------|-----------|------------------|-----------|
| Source Type | ESI        | Ion Polarity          | Positive  | Set Nebulizer    | 0.4 Bar   |
| Focus       | Not active | Set Capillary         | 4500 V    | Set Dry Heater   | 180 °C    |
| Scan Begin  | 50 m/z     | Set End Plate Offset  | -500 V    | Set Dry Gas      | 4.0 l/min |
| Scan End    | 3000 m/z   | Set Collision Cell RF | 550.0 Vpp | Set Divert Valve | Source    |

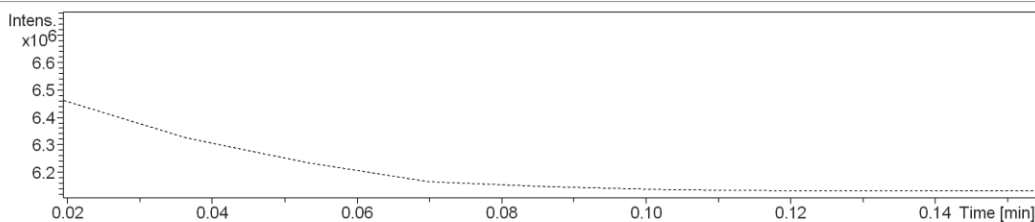

| #    | RT [min] | Area | Int. Type        | Intens. | S/N  | Chromatogram | Max. m/z |
|------|----------|------|------------------|---------|------|--------------|----------|
| n.a. | 0.1      | n.a. | Average spectrum | n.a.    | n.a. | n.a.         | 302.1661 |

### +MS, 0.0-0.1min #(2-7)

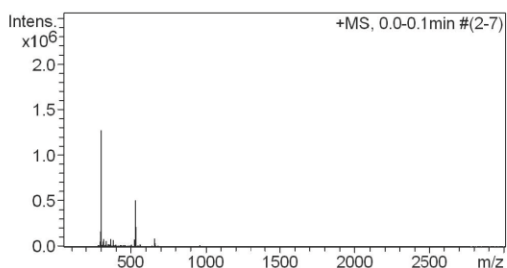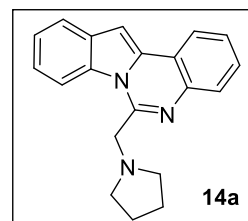

| #  | m/z      | Res. | S/N      | I       | I %   |
|----|----------|------|----------|---------|-------|
| 1  | 298.1386 | 5305 | 40042.5  | 73411   | 5.8   |
| 2  | 300.1544 | 5275 | 87086.4  | 159658  | 12.5  |
| 3  | 302.1661 | 3304 | 695297.9 | 1274713 | 100.0 |
| 4  | 303.1749 | 4553 | 519779.4 | 952929  | 74.8  |
| 5  | 304.1766 | 5572 | 73691.5  | 135101  | 10.6  |
| 6  | 318.2415 | 5296 | 41333.8  | 75779   | 5.9   |
| 7  | 367.1970 | 5537 | 41340.5  | 75791   | 5.9   |
| 8  | 532.2594 | 5719 | 272699.1 | 499948  | 39.2  |
| 9  | 533.2616 | 5887 | 114669.4 | 210227  | 16.5  |
| 10 | 660.2596 | 6306 | 44630.5  | 81823   | 6.4   |

**Figure S49.** Copy of HRMS (ESI) spectra of compound **14a**.



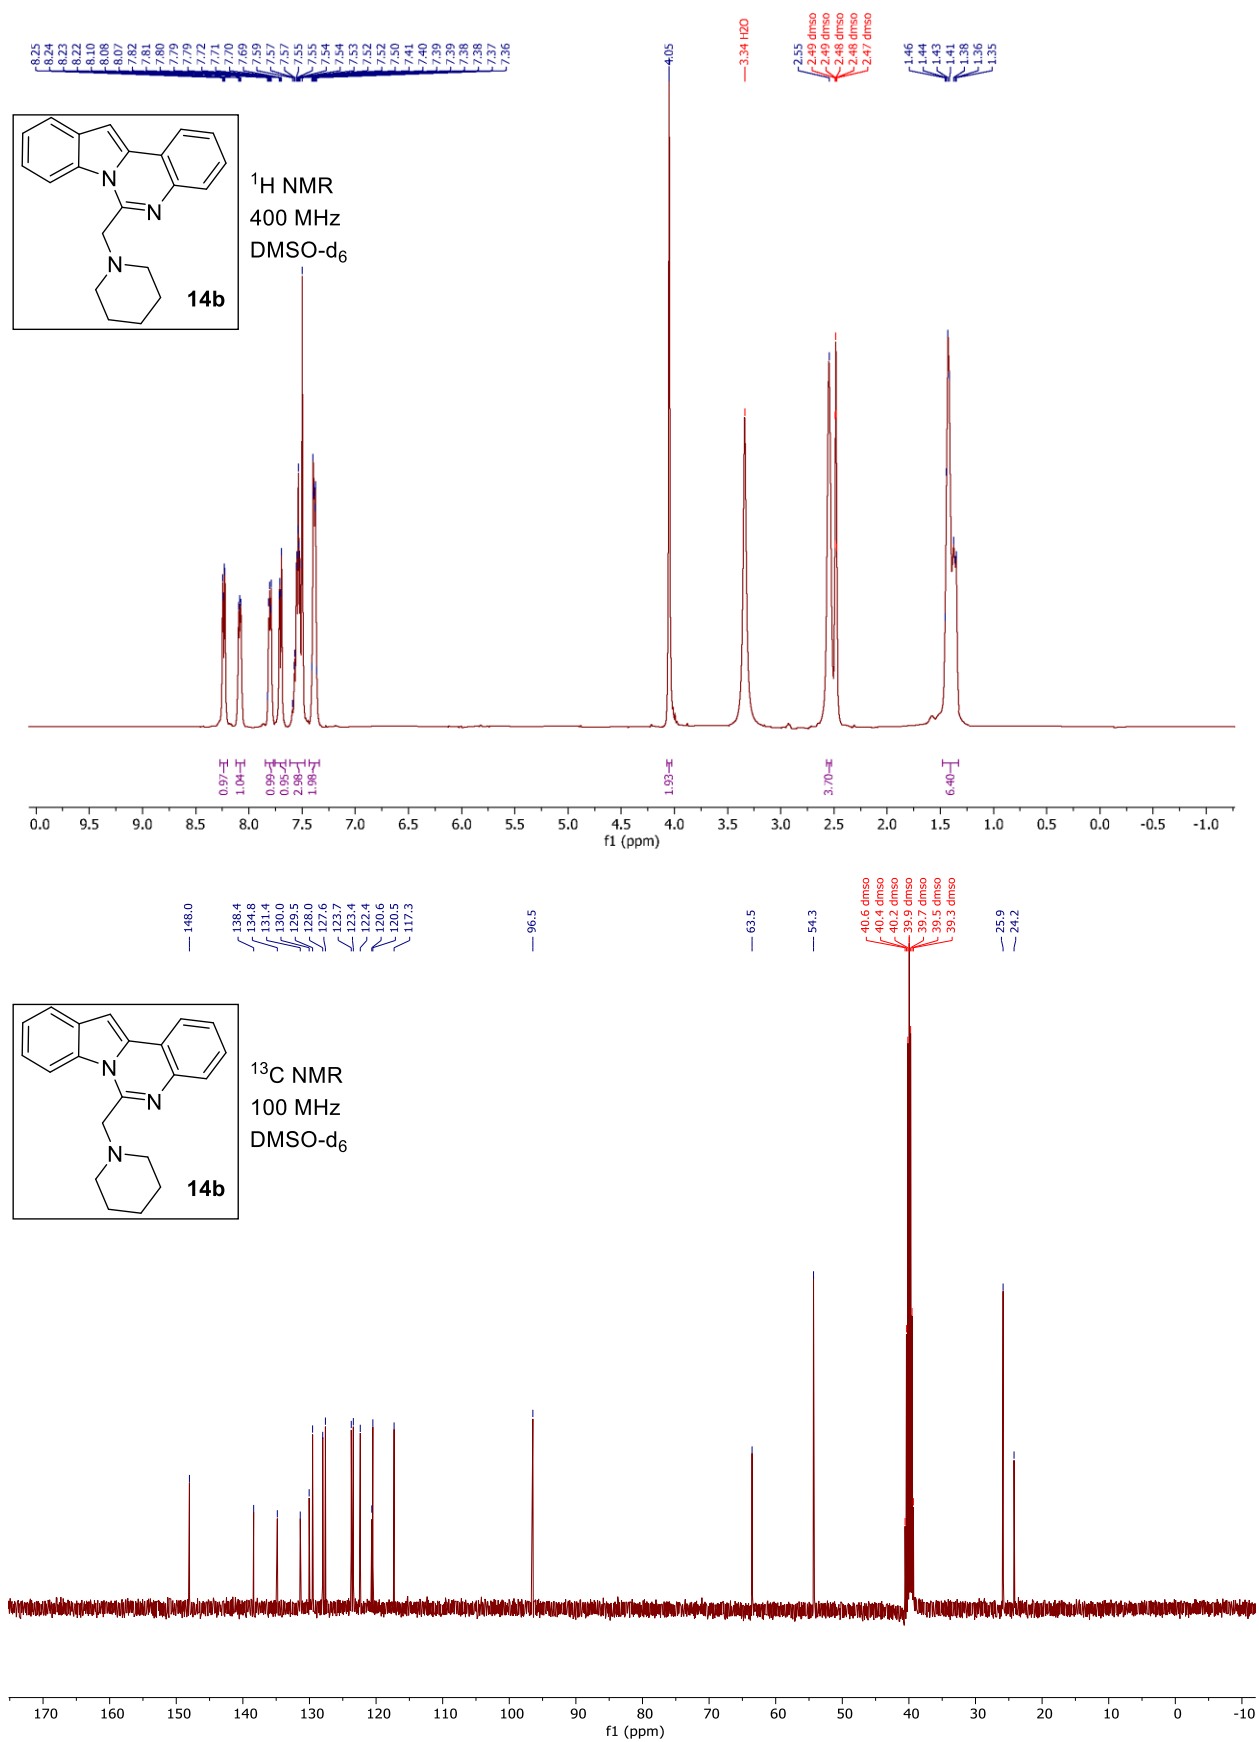

**Figure S50.** <sup>1</sup>H and <sup>13</sup>C NMR spectra of compound **14b**.

## Compound Spectrum List Report

### Analysis Info

Analysis Name D:\Data\AST\KDV-51.d  
 Method tune\_low\_norm.m  
 Sample Name Tune wide  
 Comment

Acquisition Date 11/22/2024

Operator Mitrokhov  
 Instrument / Ser# microTOF-Q II 10225

### Acquisition Parameter

|             |          |                       |           |                  |           |
|-------------|----------|-----------------------|-----------|------------------|-----------|
| Source Type | ESI      | Ion Polarity          | Positive  | Set Nebulizer    | 0.4 Bar   |
| Focus       | Active   | Set Capillary         | 4500 V    | Set Dry Heater   | 180 °C    |
| Scan Begin  | 50 m/z   | Set End Plate Offset  | -500 V    | Set Dry Gas      | 4.0 l/min |
| Scan End    | 3000 m/z | Set Collision Cell RF | 150.0 Vpp | Set Divert Valve | Source    |

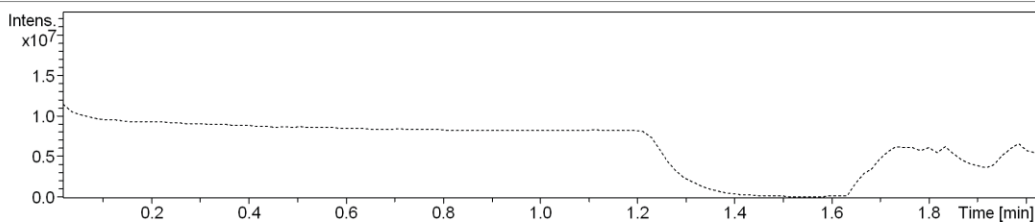

| #    | RT [min] | Area | Max. m/z |
|------|----------|------|----------|
| n.a. | 0.1      | n.a. | 316.1816 |

### +MS, 0.1-0.2min #(3-13)

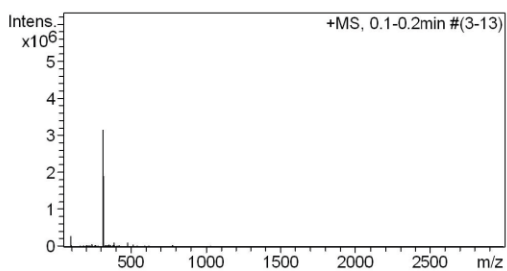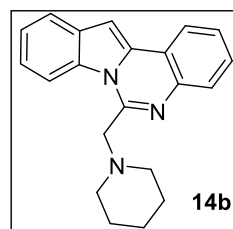

| #  | m/z      | I       | I %   |
|----|----------|---------|-------|
| 1  | 98.0988  | 275078  | 8.8   |
| 2  | 242.2875 | 52502   | 1.7   |
| 3  | 314.1680 | 305100  | 9.7   |
| 4  | 315.1699 | 79574   | 2.5   |
| 5  | 316.1816 | 3138921 | 100.0 |
| 6  | 317.1898 | 1876999 | 59.8  |
| 7  | 318.1880 | 279458  | 8.9   |
| 8  | 389.2641 | 98243   | 3.1   |
| 9  | 477.8087 | 89475   | 2.9   |
| 10 | 478.3101 | 49494   | 1.6   |

**Figure S51.** Copy of HRMS (ESI) spectra of compound **14b**.

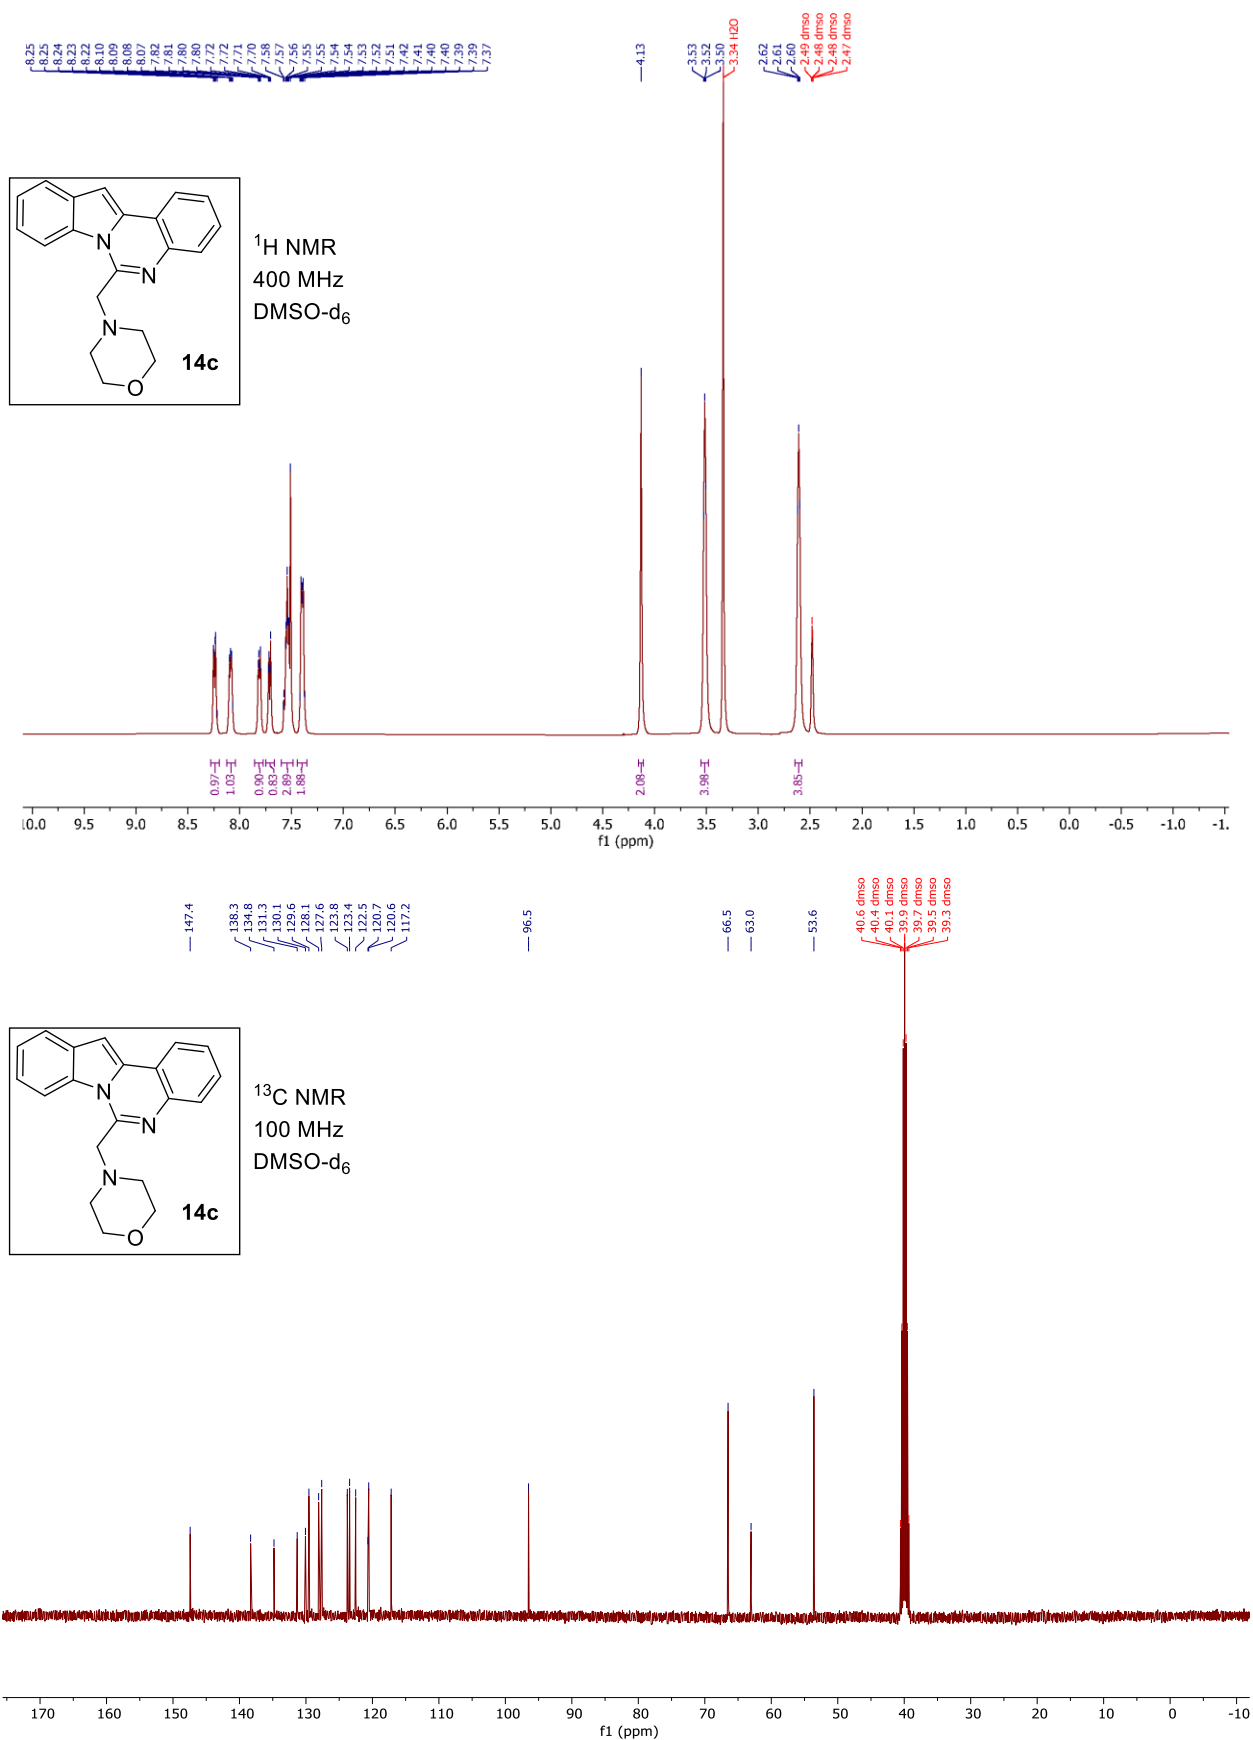

**Figure S52.** <sup>1</sup>H and <sup>13</sup>C NMR spectra of compound **14c**.

## Compound Spectrum List Report

### Analysis Info

Analysis Name D:\Data\AST\KDV-53().d  
 Method tune\_low\_norm.m  
 Sample Name Tune wide  
 Comment

Acquisition Date 6/28/2025

Operator Mitrokhov  
 Instrument / Ser# microTOF-Q II 10225

### Acquisition Parameter

|             |          |                       |           |                  |           |
|-------------|----------|-----------------------|-----------|------------------|-----------|
| Source Type | ESI      | Ion Polarity          | Negative  | Set Nebulizer    | 0.4 Bar   |
| Focus       | Active   | Set Capillary         | 3500 V    | Set Dry Heater   | 180 °C    |
| Scan Begin  | 50 m/z   | Set End Plate Offset  | -500 V    | Set Dry Gas      | 4.0 l/min |
| Scan End    | 3000 m/z | Set Collision Cell RF | 150.0 Vpp | Set Divert Valve | Source    |

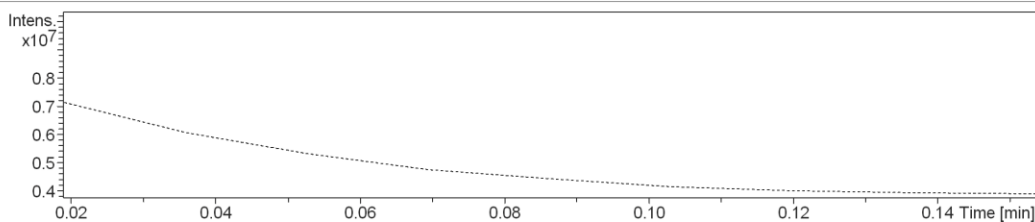

| #    | RT [min] | Area | Max. m/z |
|------|----------|------|----------|
| n.a. | 0.1      | n.a. | 316.1439 |

### -MS, 0.1-0.1min #(3-8)

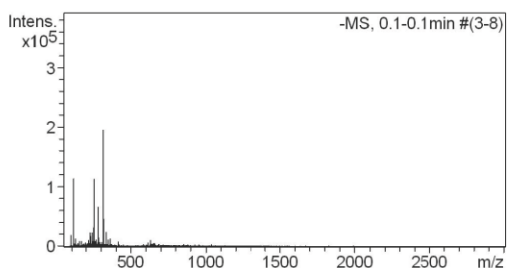

| #  | m/z      | I      | I %   |
|----|----------|--------|-------|
| 1  | 112.9812 | 112917 | 57.9  |
| 2  | 227.1952 | 22360  | 11.5  |
| 3  | 241.2097 | 22377  | 11.5  |
| 4  | 253.2088 | 31152  | 16.0  |
| 5  | 255.2266 | 112395 | 57.6  |
| 6  | 281.2408 | 24633  | 12.6  |
| 7  | 283.2567 | 65619  | 33.7  |
| 8  | 316.1439 | 194993 | 100.0 |
| 9  | 317.1405 | 45266  | 23.2  |
| 10 | 334.1486 | 23280  | 11.9  |

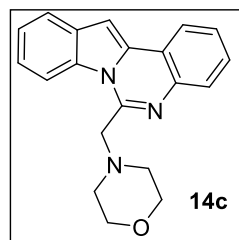

**Figure S53.** Copy of HRMS (ESI) spectra of compound **14c**.

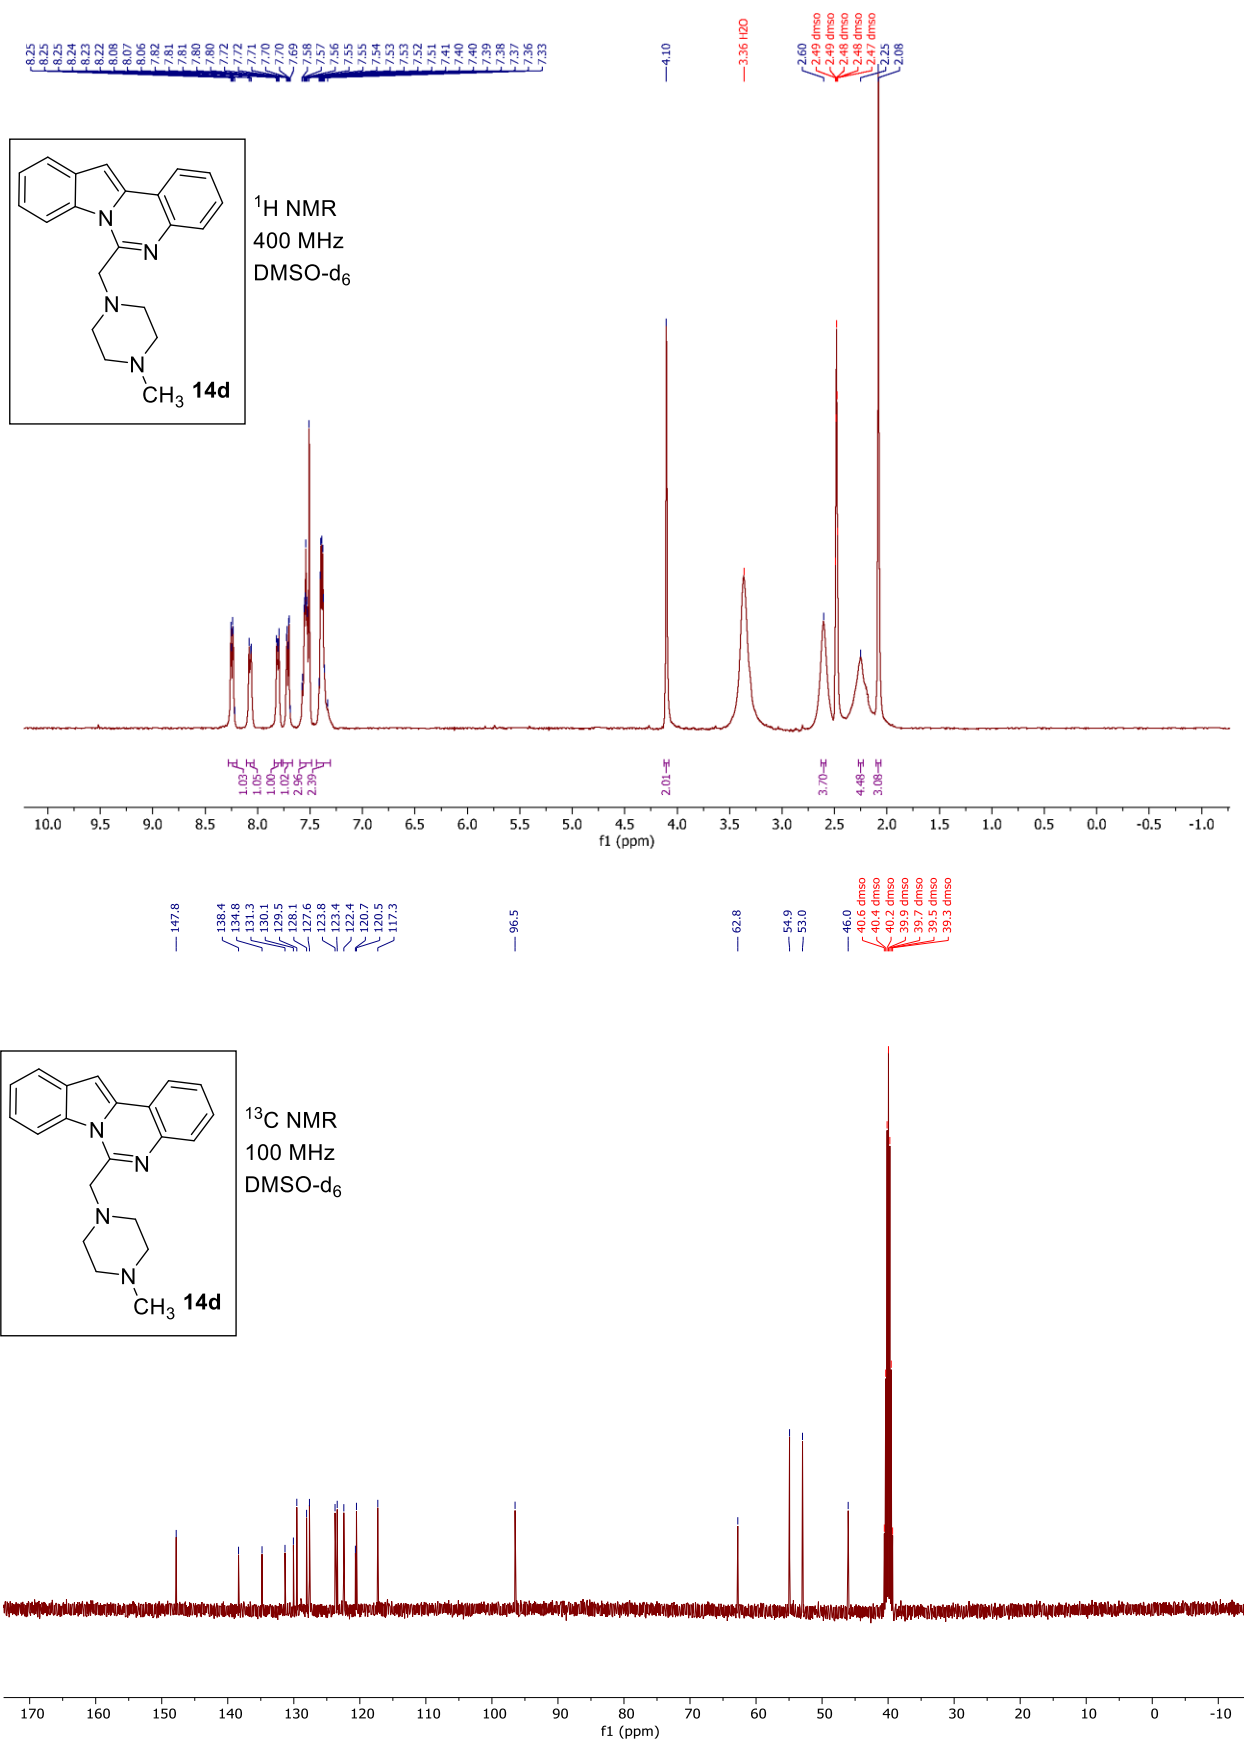

**Figure S54.** <sup>1</sup>H and <sup>13</sup>C NMR spectra of compound **14d**.

## Compound Spectrum List Report

### Analysis Info

Analysis Name D:\Data\AST\KDV-52.d  
 Method tune\_norm.m  
 Sample Name Tune wide  
 Comment

Acquisition Date 6/29/2025

Operator Mitrokhov  
 Instrument / Ser# microTOF-Q II 10225

### Acquisition Parameter

|             |            |                       |           |                  |           |
|-------------|------------|-----------------------|-----------|------------------|-----------|
| Source Type | ESI        | Ion Polarity          | Positive  | Set Nebulizer    | 0.4 Bar   |
| Focus       | Not active | Set Capillary         | 4500 V    | Set Dry Heater   | 180 °C    |
| Scan Begin  | 50 m/z     | Set End Plate Offset  | -500 V    | Set Dry Gas      | 4.0 l/min |
| Scan End    | 3000 m/z   | Set Collision Cell RF | 550.0 Vpp | Set Divert Valve | Source    |

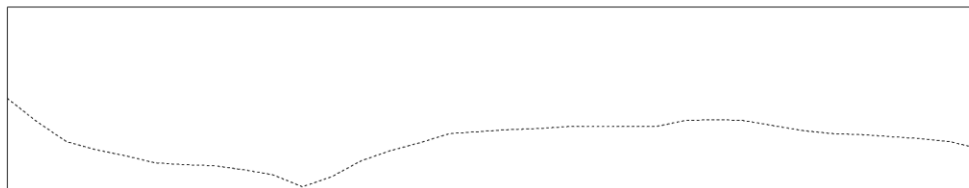

| #    | RT [min] | Area | Int. Type        | Intens. | S/N  | Chromatogram | Max. m/z |
|------|----------|------|------------------|---------|------|--------------|----------|
| n.a. | 0.3      | n.a. | Average spectrum | n.a.    | n.a. | n.a.         | 331.1922 |

### +MS, 0.1-0.5min #(5-28)

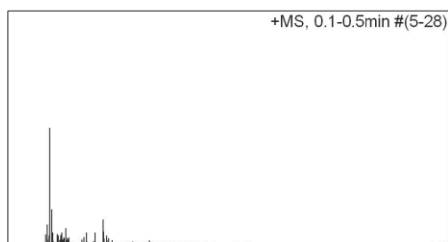

| #  | m/z      | Res. | S/N       | I       | I%    |
|----|----------|------|-----------|---------|-------|
| 1  | 317.1741 | 5399 | 465509.8  | 213359  | 16.7  |
| 2  | 331.1922 | 2740 | 2781818.0 | 1275000 | 100.0 |
| 3  | 332.1941 | 4292 | 2708072.8 | 1241200 | 97.3  |
| 4  | 333.1945 | 5746 | 576094.9  | 264044  | 20.7  |
| 5  | 347.1845 | 5554 | 823752.3  | 377553  | 29.6  |
| 6  | 413.2401 | 5684 | 279561.5  | 128132  | 10.0  |
| 7  | 439.2215 | 5810 | 385652.8  | 176758  | 13.9  |
| 8  | 577.2676 | 6252 | 278484.6  | 127639  | 10.0  |
| 9  | 689.3326 | 6394 | 586869.3  | 268982  | 21.1  |
| 10 | 690.3352 | 6592 | 293402.7  | 134476  | 10.5  |

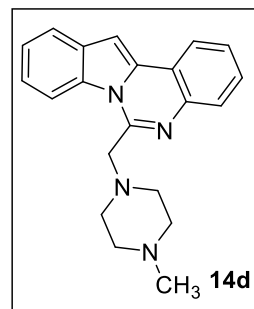

**Figure S55.** Copy of HRMS (ESI) spectra of compound **14d**.
